# Supplementary material
Source: PubMed Central journal article supplement (PMC4246258)
Supplement: pnas.1406304111.sapp.pdf [file pnas.1406304111.sapp.pdf]

## Supporting Information

### SI Methods

**Compatibility for Unordered Multistate Characters.** Compatibility is easy to calculate for binary characters: any pair with 3 or fewer combinations (state-pairs) fits any number of trees with only one derivation per state (Fig. S1A). However, once a 4<sup>th</sup> combination appears, then there must have been a parallelism or reversal in one or both characters (1, 2). It is slightly more difficult to calculate compatibility if one character has 3+ states. The characters clearly are incompatible if every possible combination is present. However, incompatibility is possible with fewer than the maximum number of state-pairs. Here, we calculate multistate character compatibility by breaking down the characters into all possible binary comparisons. There are two criteria for compatibility: 1) all of the binary comparisons must have fewer than 4 combinations; 2) at least one state-pair must not be the intermediate pair in any of those comparisons.

Consider two 3-state characters with the following state-pairs. Italics denote the state-pair that is intermediate between the other two. For all comparisons, there are fewer than four state-

| Data      | Binary Breakdowns |           |           |           |           |           |           |           |  |
|-----------|-------------------|-----------|-----------|-----------|-----------|-----------|-----------|-----------|--|
| <b>00</b> | <i>00</i>         | <b>00</b> |           | <b>00</b> |           |           |           |           |  |
| <b>01</b> | <b>10</b>         |           | <b>01</b> | <i>01</i> | <b>01</b> |           |           |           |  |
| <b>10</b> | <b>01</b>         | <i>10</i> |           |           |           | <b>10</b> | <b>10</b> |           |  |
| <b>12</b> |                   | <b>12</b> | <b>12</b> |           |           |           | <b>12</b> | <b>12</b> |  |
| <b>21</b> |                   |           |           | <b>21</b> | <b>21</b> | <b>21</b> |           | <b>21</b> |  |

pairs. Moreover, two of those state-pairs (**12** & **21**) are not the intermediate state-pair in any of its combinations. We can create a character state tree that does not demand homoplasy (Fig. S1B), meaning that the characters are compatible.

Now, consider a similar pair of characters that have one extra state-pair, 22. Again, italicized pairs are the “intermediate” state-pair in each comparison. In all cases, there are fewer than four state-pairs. However, every state-pair now is intermediate in one breakdown. This means that we cannot draw a tree with open branches; instead, there must be a parallelism or reversal somewhere and the characters are incompatible (Fig. S1C).

| Data |           | Binary Breakdowns |    |           |    |           |    |           |           |
|------|-----------|-------------------|----|-----------|----|-----------|----|-----------|-----------|
| 00   | <i>00</i> | 00                | 00 | 00        | 00 |           |    |           |           |
| 01   | 10        |                   | 01 | <i>01</i> |    | 01        |    |           |           |
| 10   | <i>01</i> | <i>10</i>         |    |           |    |           | 10 | 10        |           |
| 12   |           | 12                | 12 |           |    |           |    | <i>12</i> | 12        |
| 21   |           |                   |    | 21        |    | <i>21</i> | 21 |           | <i>21</i> |
| 22   |           |                   |    |           | 22 | <i>22</i> |    | <i>22</i> | <i>22</i> |

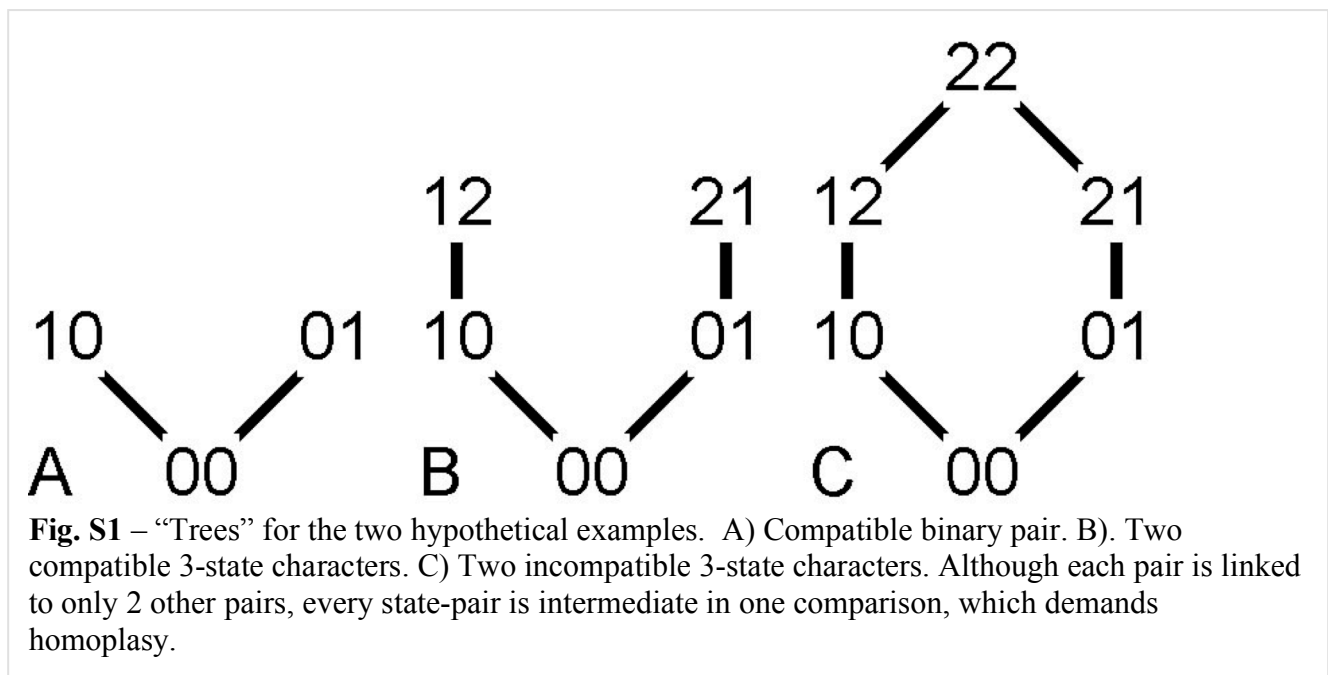

Finally, when dealing with more than 3 states per character, the same routine must be broken down to ensure that there are no “closed circuits” among any state trio (e.g., Fig. S1C).

### Stratigraphic Compatibility for Unordered Multistate Characters.

We examine stratigraphic compatibility for all binary breakdowns with three combinations. For a binary + 3-

state character, we can have

two comparisons. This can

generate two hierarchical

(HSC) pairs (Fig. S2A) if a

derived pair (e.g., 10) is

intermediate on two

sequences. Alternatively,

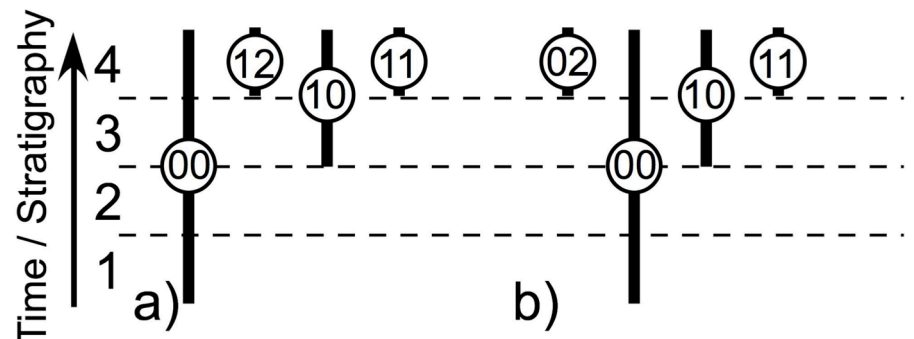

**Fig. S2** – A 2-state and 3-state character pair. A. Two case of hierarchical stratigraphic compatibility (HSC;  $00 \rightarrow 10 \rightarrow 11$  and  $00 \rightarrow 10 \rightarrow 12$ ). B. One case of HSC ( $00 \rightarrow 10 \rightarrow 11$ ) and one case of divergent stratigraphic compatibility (DSC;  $00 \rightarrow 10$ ,  $00 \rightarrow 02$ ).

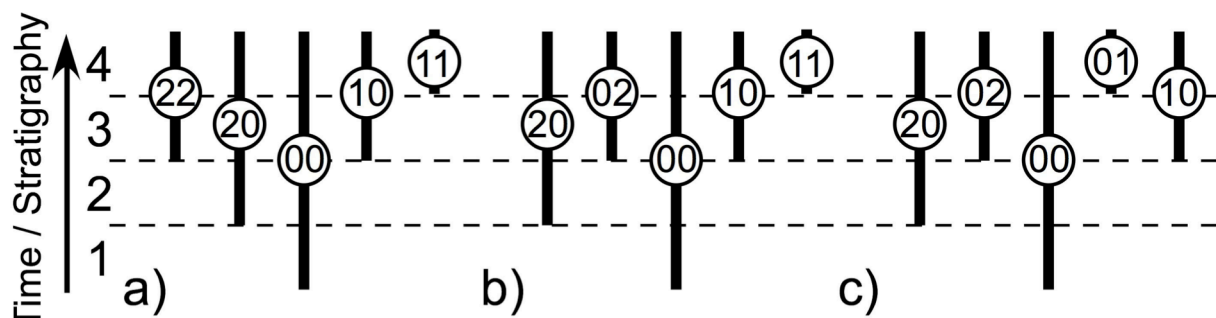

**Fig. S3** – Two 3-state character pair. A. Two case of HSC ( $00 \rightarrow 10 \rightarrow 11$  and  $00 \rightarrow 20 \rightarrow 22$ ). B. One case of HSC ( $00 \rightarrow 10 \rightarrow 11$ ) and two cases of DSC ( $00 \rightarrow 10$ ,  $00 \rightarrow 20$ ,  $00 \rightarrow 02$  and  $00 \rightarrow 20$ ,  $00 \rightarrow 02$ ). C. Four cases of DSC ( $00 \rightarrow 10$ ,  $00 \rightarrow 20$ ,  $00 \rightarrow 10$ ,  $00 \rightarrow 20$ ,  $00 \rightarrow 01$ ,  $00 \rightarrow 01$ ,  $00 \rightarrow 02$  and  $00 \rightarrow 02$ ).

this can generate one HSC and one divergent (DSC) pair if the oldest combination (00) is

intermediate on one sequence but not on the other (Fig. S2B). If both characters have 3-states,

then we can see two HSC cases (Fig. S3A). However, we can see up to four DSC cases if we get

all four possible binary breakdowns with the oldest combination intermediate each time (Fig.

S3C). Note also that this example is compatible if we assume unordered character state

evolution.

**On the Relationship between Compatibility and Homoplasy.** The first principles deduction

that numbers of compatible

character-pairs should decrease as

amounts of homoplasy increase is

easy to verify through simulations

(4-6). We repeat these here (Fig.

S4), in simulations using 32 taxa

with 100 binary characters (and

thus 100 derived states). As the

number of changes per derived

state increases (i.e., as the number

of homoplasies increases),

compatibility for the whole matrix

decreases. This illustrates that simulations can generate a probabilistic distribution of expected

compatibility given  $X$  changes among  $Y$  characters with  $Z$  derived states. For our purposes,

when simulations of  $S$  taxa with  $Y$  characters and  $Z$  derived states matches compatibility

observed in a real dataset of  $S$  taxa with  $Y$  characters and  $Z$  derived states, then the simulation

has used a plausible number of total changes.

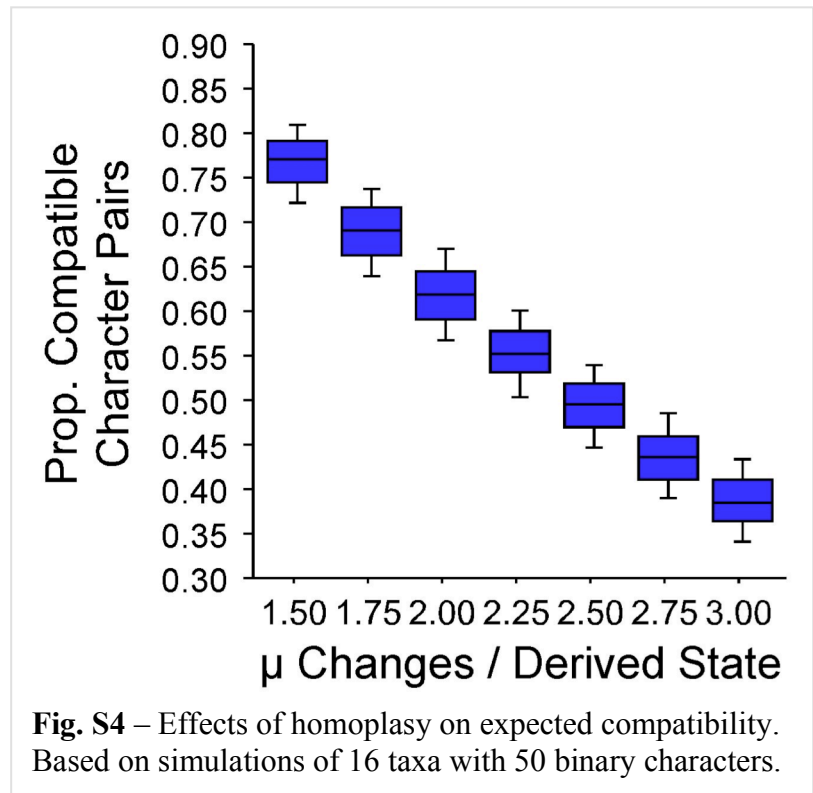

**The Effects of Different Sampling and Evolutionary Parameters on Expected Hierarchical**

**Stratigraphic Compatibility.** We simulate the evolution of 32 taxa with 100 binary characters

to explore the effects of a variety of sampling and evolutionary parameters on the expectations of

both general stratigraphic compatibility (GSC) and hierarchical stratigraphic compatibility (HSC;

see main text). The varying parameters include: 1) basic speciation/cladogenetic model; 2) typical sampling intensity; 3) temporal variation in sampling intensity; 4) frequencies of homoplasy; and, 5) continuous exponential versus logistic diversification over different logistic parameters. We assess the effects of speciation models by using both budding and bifurcating cladogenesis. The budding model is used in many Monte Carlo analyses conducted by paleobiologists (7-11) and it is the expectation of speciation models such as punctuated equilibrium (12). For the genus-level, budding is an expectation among polytypic genera even if speciation is anagenetic: even if one species anagenetically evolves so much that later (morpho)species are placed in another genus, other species from the “ancestral” genus will persist. The bifurcating model is frequently assumed in neontological analyses (e.g., 14). If rates of anagenesis match those of cladogenesis, then bifurcating patterns will be common. Models such as vicariance also predict bifurcating patterns (15). The primary difference is that ancestral species persist after speciation in the budding model and thus a single species can have any number of descendants, whereas ancestral species become anagenetically extinct (“pseudoextinct”; 16) at cladogenesis and give rise to two descendants in the bifurcating model. Pseudo-extinction raises expected stratigraphic compatibility slightly by making it impossible for ancestors to first appear in younger strata than their descendants (Fig. 3A-D). However, budding generally raises expected HSC by making it easier for a single species to have multiple descendants without shifts in speciation rates (Fig. 3A-D).

We address two effects of sampling intensity: that of relatively good/poor sampling, and that of variation in sampling over time. This is critical because different higher taxonomic groups have different general sampling rates: e.g., molluscs typically show higher preservation rates than do fishes (17). We examine expectations given the same general rate of character change

per sampled taxon (here, 1.5 changes per character state) and assuming exponential diversification with both budding and bifurcating models. The cladogenesis rates are  $1.1\times$  extinction rates. We give the sampling rates relative to extinction rates; when these are equal, then we expect to sample a species of median duration once; at 0.01 we expect to sample 1% of taxa with median durations. We expect GSC in 90-95% of compatible character pairs over all ranges of sampling (Fig. S5A); as noted above, we expect slightly higher GSC given bifurcating cladogenesis than given budding cladogenesis. Expectations for HSC also show little trend, with an expectation of approximately 40% over all sampling rates, with slightly higher expectations with budding cladogenesis rather than bifurcating cladogenesis.

In addition to varying among taxa, sampling intensity also can vary fairly substantially over time within higher taxonomic groups (e.g., 18, 19). This *decreases* rather than increases the expected stratigraphic gaps implied by phylogenies (20) and thus might affect stratigraphic compatibility. Therefore, we repeat the simulations with lognormal variation in the sampling rates. We scale the variation so that every standard deviation doubles the rate; thus, 15.8% of “stages” have more than twice the median sampling rate and 15.8% have less than one half the median sampling rate; 2.2% have more than four times the median sampling rate, and 2.2% have less than one quarter the median sampling rate, etc. This has little effect on the expected GSC (Fig S3B). Variable sampling decreases expected HSC among stratigraphically compatible pairs, albeit only very slightly. This suggests that our overall results are slightly conservative.

To assess the effect of homoplasy, we repeat the simulations over a wide range of rates of character-change. Sampling rates here is  $0.31\times$  extinction rates and diversification is exponential. We again use both budding and bifurcating cladogenetic models. As frequencies of homoplasy increase, expected GSC drops slightly whereas the expected HSC increases slightly

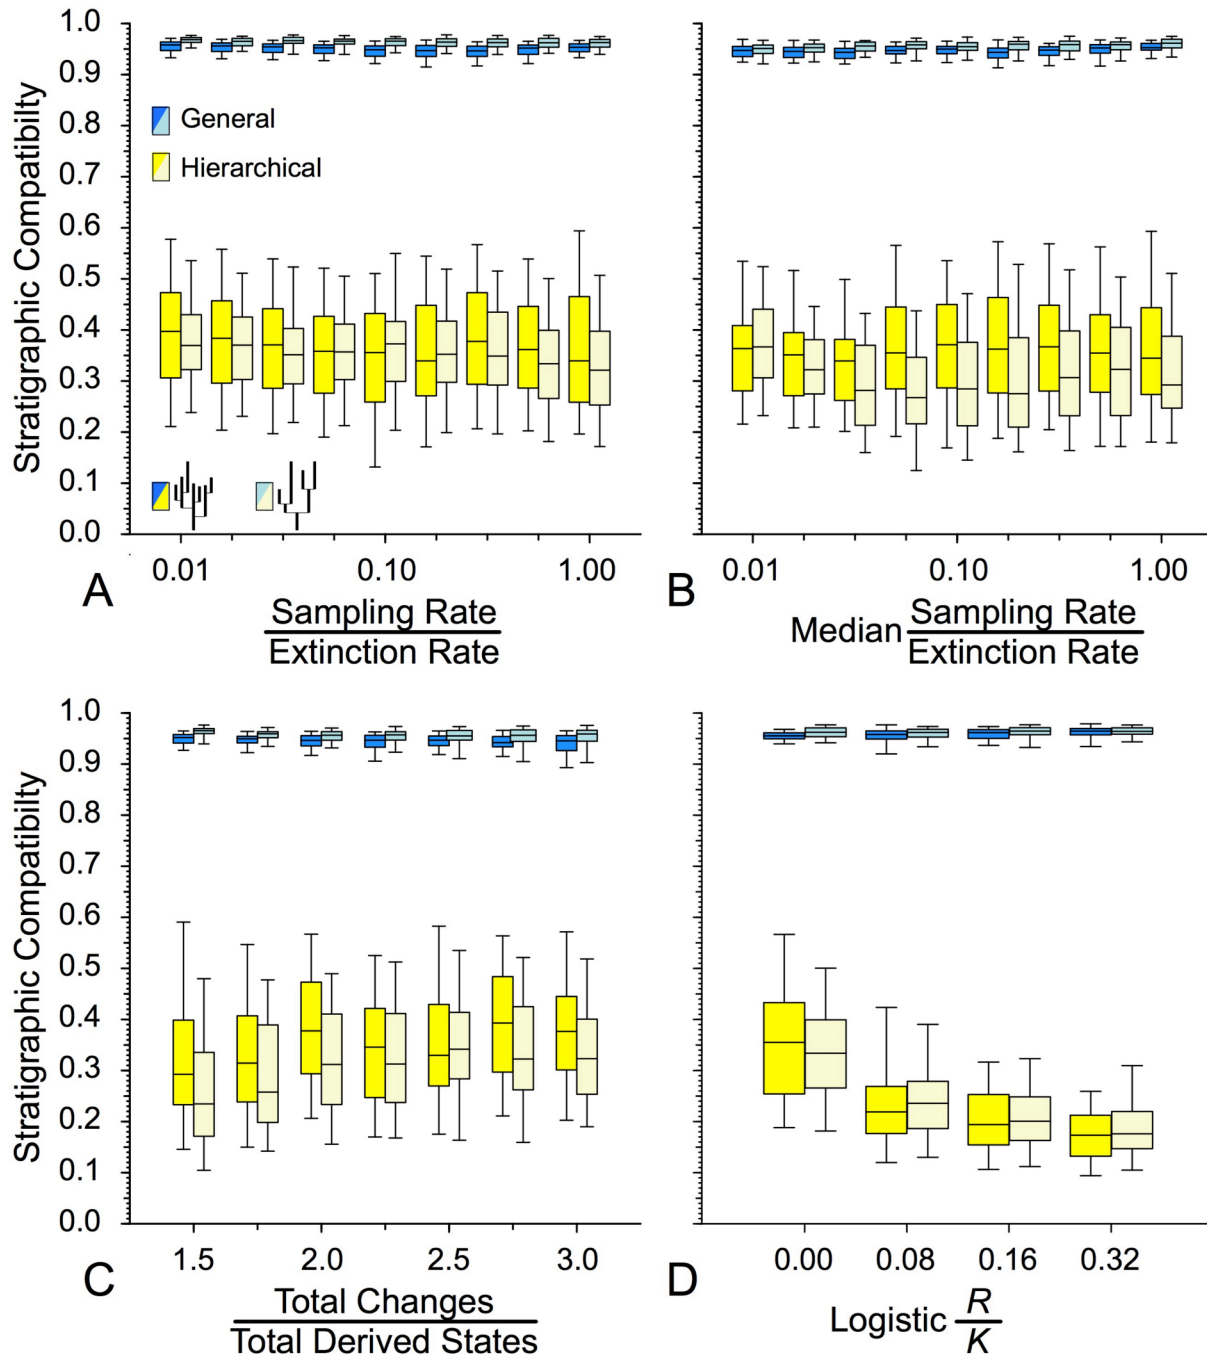

**Fig. S5** – Simulated expectations for general (GSC) and hierarchical (HSC) stratigraphic compatibility using 32 taxa and 100 binary characters. Dark shades give expectations from budding cladogenesis and pale shades give expectations from bifurcating cladogenesis. (A) Sampling intensity relative to extinction intensity. (B) Sampling intensity varying over time. (C) Effects of homoplasy. (D) Effects of logistic diversification.  $R$  is the intrinsic rate of diversification. Equilibrium richness  $K=\infty$  at  $R/K = 0$ , making diversification exponential;  $K=25$  in all other cases. Diversification is exponential in (A), (B) and (C). Characters average 1.5 changes per derived state in (A), (B) and (D); Sampling intensity is uniform and  $0.31 \times$  the extinction rate in (C) and (D).

(Fig. S5C). Again, expected GSC is slightly higher given bifurcation and expected HSC is slightly higher given budding.

Numerous paleontological studies (21-24) and some molecular studies (25) suggest that diversification is not exponential, but instead decreases as standing richness increases. We use logistic diversification (e.g., 26) to assess the possible effects of decreasing net origination over time. Under this model,

$$\Delta S = RS\left(1 - \frac{S}{K}\right)$$

where  $S$  is the standing richness,  $\Delta S$  is the change in richness,  $R$  is an intrinsic rate of increase, and  $K$  is the equilibrium richness (27). We assume constant extinction rates ( $\mu$ ), which means that cladogenesis rate  $\lambda$  shifts so that:

$$\lambda = \mu + \ln(S + \Delta S) - \ln(S) \text{ (see 28).}$$

Thus, as  $R$  increases relative to  $K$ , the difference between  $\mu$  and initial  $\lambda$  increases and the time required to reach  $K$  decreases. (Thus, exponential diversification is essentially a special case of logistic diversification in which  $K=\infty$  and thus  $R/K$  is essentially 0). We expect slightly more GSC given logistic diversification than we do given exponential diversification; we also expect markedly less HSC given logistic diversification than we do given exponential diversification ( $R/K = 0$ ; Fig. S5D). Within different logistic systems, expectations for both GSC and HSC become more pronounced as  $R$  (and thus early cladogenesis rates) increases relative to  $K$ . Both patterns simply reflect speciation rates being highest among taxa that have had the fewest chances to accumulate derivations. Thus, **00** taxa frequently have (over their history) higher speciation rates than **01** taxa, which in turn elevates expected divergent stratigraphic compatibility for the same reasons that elevated net speciation would elevate expected HSC. More complex richness-dependent diversification models such as hierarchical diversification



(e.g., 29) typically predict more rapid early rises in diversity than do logistic models do. Thus, the differences between exponential and richness-dependent models should become more pronounced as the intrinsic rate of diversification increases relative to maximum richness.

**Estimating Cumulative Disparity for the First Half of Clade Evolution.** Disparity studies typically examine relative amounts of disparity (however measured) in different time units or different clades. However, the relevant hypotheses here make explicit predictions about the cumulative character space (= morphospace) occupied by a clade; that is, the size of the character

**Table S1. Estimating Cumulative Disparity at  $S/2$  among Devonian *Floweria* species (3).**

| Taxon         | <i>F. be.</i> | <i>F. de.</i> | <i>F. pa.</i> | <i>F. pe.</i> | <i>F. an.</i> | <i>F. ar.</i> | <i>F. co.</i> | <i>F. cr.</i> | <i>F. li.</i> | <i>F. ch.</i> | <i>F. io.</i> | <i>F. ma.</i> | <i>F. pr.</i> | <i>F. tr.</i> |
|---------------|---------------|---------------|---------------|---------------|---------------|---------------|---------------|---------------|---------------|---------------|---------------|---------------|---------------|---------------|
| <i>F. be.</i> | •             | 0.520         | 0.643         | 0.536         | 0.536         | 0.464         | 0.375         | 0.375         | 0.583         | 0.464         | 0.444         | 0.583         | 0.500         | 0.542         |
| <i>F. de.</i> | 0.520         | •             | 0.720         | 0.720         | 0.240         | 0.640         | 0.208         | 0.500         | 0.208         | 0.400         | 0.417         | 0.667         | 0.400         | 0.500         |
| <i>F. pa.</i> | 0.643         | 0.720         | •             | 0.179         | 0.571         | 0.321         | 0.750         | 0.625         | 0.708         | 0.464         | 0.556         | 0.333         | 0.607         | 0.458         |
| <i>F. pe.</i> | 0.536         | 0.720         | 0.179         | •             | 0.536         | 0.393         | 0.708         | 0.667         | 0.667         | 0.429         | 0.556         | 0.375         | 0.643         | 0.500         |
| <i>F. an.</i> | 0.536         | 0.240         | 0.571         | 0.536         | •             | 0.643         | 0.292         | 0.542         | 0.250         | 0.321         | 0.296         | 0.625         | 0.321         | 0.542         |
| <i>F. ar.</i> | 0.464         | 0.640         | 0.321         | 0.393         | 0.643         | •             | 0.667         | 0.500         | 0.792         | 0.429         | 0.667         | 0.333         | 0.679         | 0.458         |
| <i>F. co.</i> | 0.375         | 0.208         | 0.750         | 0.708         | 0.292         | 0.667         | •             | 0.333         | 0.208         | 0.458         | 0.208         | 0.708         | 0.208         | 0.500         |
| <i>F. cr.</i> | 0.375         | 0.500         | 0.625         | 0.667         | 0.542         | 0.500         | 0.333         | •             | 0.458         | 0.458         | 0.375         | 0.625         | 0.458         | 0.583         |
| <i>F. li.</i> | 0.583         | 0.208         | 0.708         | 0.667         | 0.250         | 0.792         | 0.208         | 0.458         | •             | 0.417         | 0.333         | 0.708         | 0.333         | 0.542         |
| <i>F. ch.</i> | 0.464         | 0.400         | 0.464         | 0.429         | 0.321         | 0.429         | 0.458         | 0.458         | 0.417         | •             | 0.481         | 0.375         | 0.571         | 0.458         |
| <i>F. io.</i> | 0.444         | 0.417         | 0.556         | 0.556         | 0.296         | 0.667         | 0.208         | 0.375         | 0.333         | 0.481         | •             | 0.667         | 0.074         | 0.458         |
| <i>F. ma.</i> | 0.583         | 0.667         | 0.333         | 0.375         | 0.625         | 0.333         | 0.708         | 0.625         | 0.708         | 0.375         | 0.667         | •             | 0.667         | 0.208         |
| <i>F. pr.</i> | 0.500         | 0.400         | 0.607         | 0.643         | 0.321         | 0.679         | 0.208         | 0.458         | 0.333         | 0.571         | 0.074         | 0.667         | •             | 0.458         |
| <i>F. tr.</i> | 0.542         | 0.500         | 0.458         | 0.500         | 0.542         | 0.458         | 0.500         | 0.583         | 0.542         | 0.458         | 0.458         | 0.208         | 0.458         | •             |

*F. be.*=*Floweria becraftensis*; *F. de.*=*F. deformis*; *F. pa.*=*F. pandora*; *F. pe.*=*F. perversa*; *F. an.*=*F. anomala*; *F. ar.*=*F. arctostriata*; *F. co.*=*F. cornucopia*; *F. cr.*=*F. crassa*; *F. li.*=*F. lirella*; *F. ch.*=*F. chemungensis*; *F. io.*=*F. iowensis*; *F. ma.*=*F. magnacatrix*; *F. pr.*=*F. prava*; *F. tr.*=*F. transversalis*. Numbers give pairwise dissimilarity between species, i.e. the number differing characters divided by the number of characters for which both species are coded. This is done after polymorphic characters are fixed to the state maximizing stratigraphic compatibility. Cumulative disparity is estimated from the average pairwise dissimilarity among: 1) *F. becraftensis* – *F. perversa* (the four early Devonian species); 2) *F. becraftensis* – *F. lirella* (the nine early-middle Devonian species); and, 3) *F. becraftensis* – *F. transversalis* (the 14 total species). Note that *F. perversa* survives into the Middle Devonian. The final number gives the cumulative disparity for all 14 species. The disparity for the first 7.5 species (i.e., the first half of *Floweria* evolution) is interpolated from the first and second numbers assuming a linear change in disparity with a logarithmic change in richness (13; Fig. S6).

space occupied by all  $S$  species in a clade. Elevated evolvability predicts that available character space is greater at the end of clade evolution than it was at the onset, whereas the null hypothesis predicts that there are no major additions to character space. If elevated evolvability is correct, then the cumulative disparity among early members of the clade (say, the first  $S/2$  species) should be less than expected if the entire character space is available to all species and that rates of change are reasonably consistent through time. The null hypothesis (no major addition of characters to any derived taxa) predicts that cumulative disparity at  $S/2$  is simply a product of the size of total character space and the average overall rate of change (13).

We present an empirical example of how we estimate cumulative disparity at  $S/2$  using 14 Devonian brachiopod species from the genus *Floweria* (3). Table S1 gives the average pairwise dissimilarity between each species, which is a common metric of disparity (e.g., 30). We separate these species into three general stratigraphic units: Early Devonian (*F. becraftensis* – *F. perversa*), Middle Devonian (*F. anomala* – *F. lirella*) and Late Devonian (*F. chemungensis* – *F. transversalis*). The key difference between our approach and typical approaches is that we estimate disparity not among just Middle Devonian or Late Devonian species, but among all species sampled in through the Middle Devonian or Late Devonian; thus, cumulative disparity for the first 9 species (i.e., through the middle Devonian) is the average of the pairwise dissimilarities among the first 9 species in Table S1, and the cumulative disparity for the entire clade is the average of all disparities in Table S1 (Fig. S6A).

As often is the case, the stratigraphic divisions do not neatly partition the 14 species into a first and second half; moreover, the true midpoint for 14 species is at 7.5 species because clades start with one species, not zero. Therefore, we interpolate cumulative disparity at  $S/2$  assuming a log-linear relationship between richness and disparity (13, 31). For example, the average

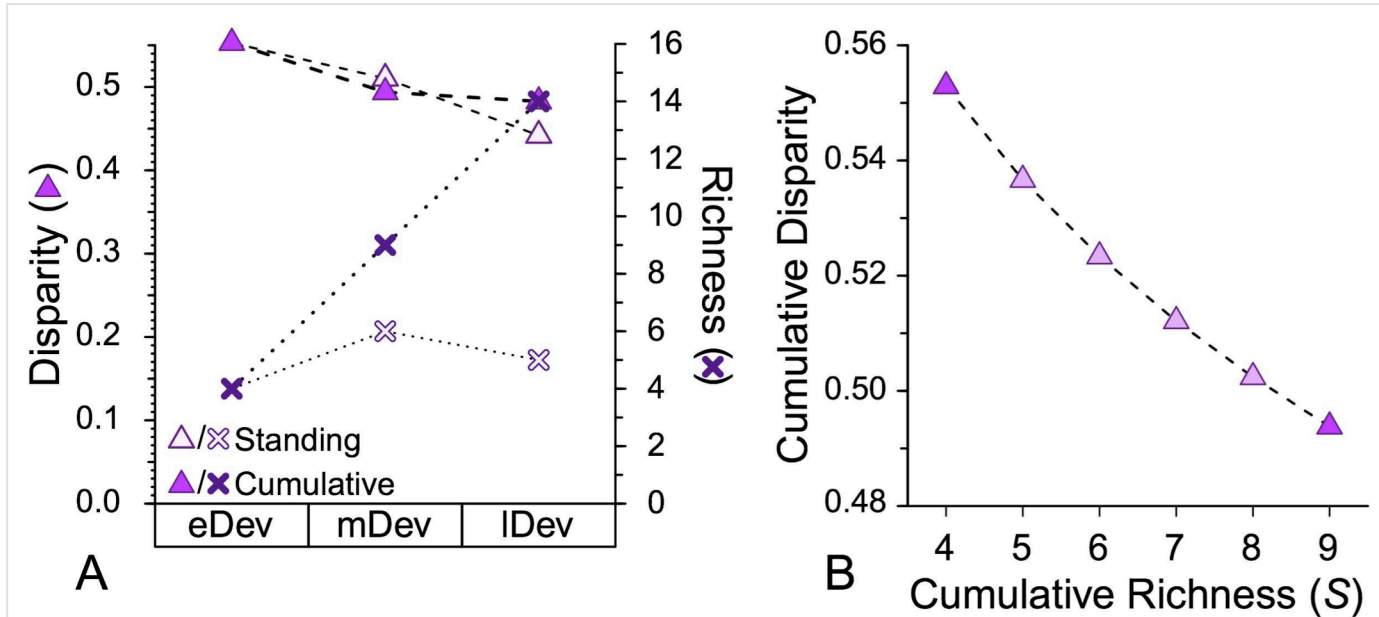

**Fig. S6** – Cumulative vs. standing disparity and richness for *Floweria* species (A) and interpolated cumulative disparity halfway through clade evolution (B). Cumulative richness and disparity sum all species sampled through the Middle or Late Devonian, whereas standing richness and disparity reflect only species present at those times. (B) Interpolates the shift in disparity from the Early Devonian (i.e., the first 4 species) and the Middle Devonian (i.e., the first 9 species). The pale triangles give the estimated cumulative disparity assuming an linear increase change in disparity with an exponential change in richness. Finally, note that the actual midpoint here (and in all clades with even numbers of species) used is at  $S=7.5$ , as clade evolution starts at  $S=1$ .

pairwise dissimilarity among the first 4 species is 0.553 whereas the average pairwise

dissimilarity is 0.494 among the first 9 species. Therefore, the slope is:  $\frac{0.553-0.494}{\ln(9)-\ln(4)}=-0.073$ , and

the interpolated disparity among the first 5 species is  $0.553-0.073 \times (\ln[5]-\ln[4])=0.537$  (Fig.

S6B). Isolated experiments show that we obtain nearly identical values if we randomly order the

5 Middle Devonian species repeatedly and take average cumulative disparities; as this is

computationally more time consuming, we used interpolation instead.

Finally, note that disparity actually decreases in this group, which is not uncommon (see Table S7). This simply reflects the rapid exhaustion of character space, which is common among fossil taxa (32), resulting in later evolution generating new combinations of existing character states and filling in character space, which in turn reduces disparity.

## SI Results

**Additional Summaries of Results Presented in Main Text.** The  $P$ -values from multiple independent tests should follow a uniform distribution. Table 1 in the main text shows this is not the case. A histogram of the  $P$ -values further emphasizes this (Fig. S7).

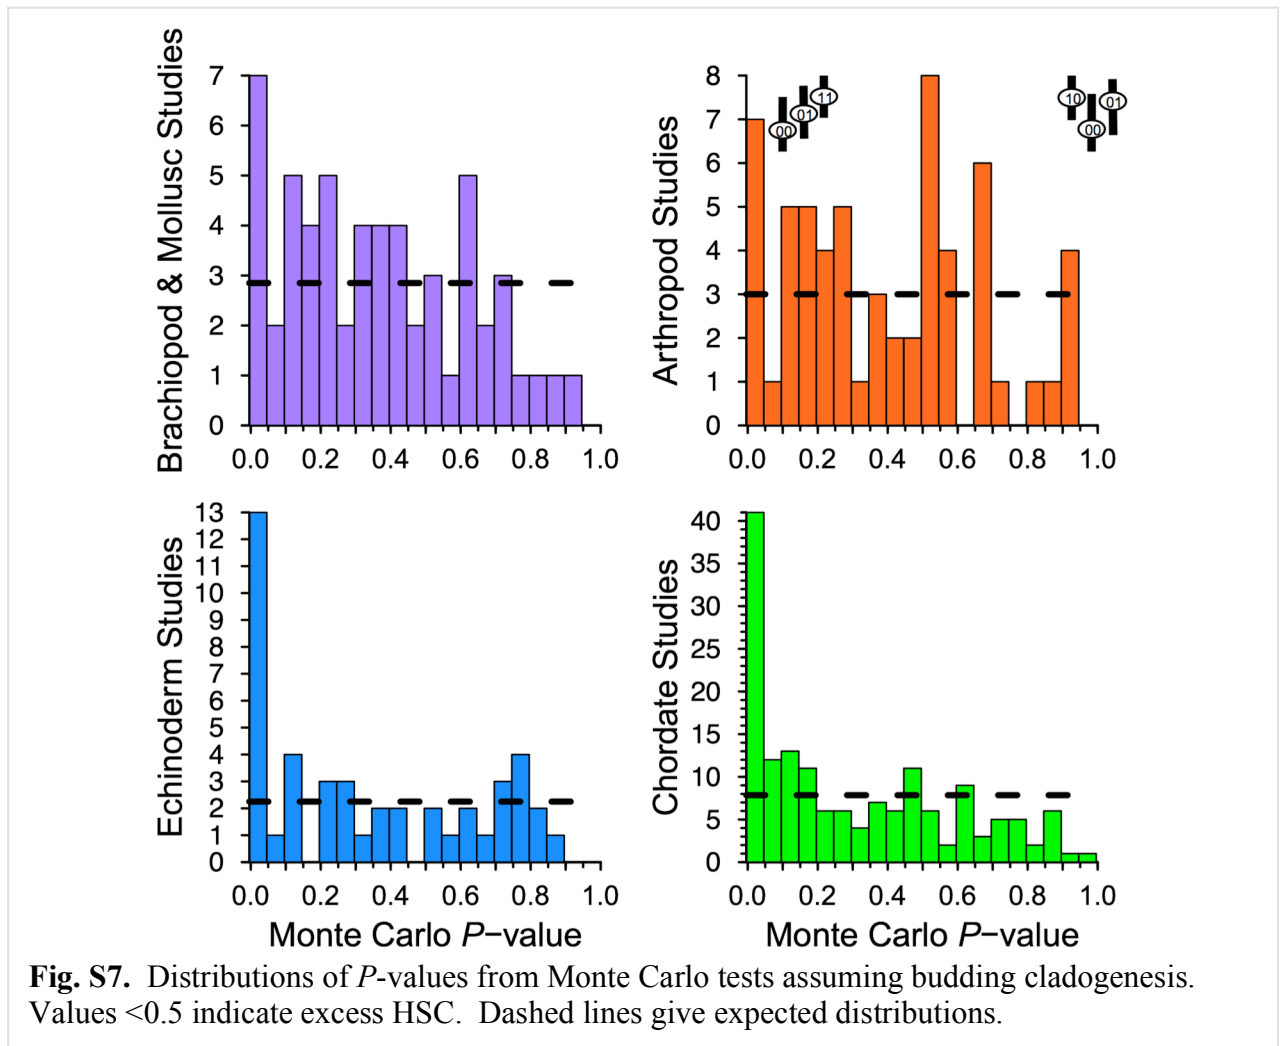

**Additional Correlations between Paraclade Durations and HSC.** Excess HSC shows a strong correlation with paraclade center-of-gravity (CG) that is lower than expected given trait-independent diversification. Additional correlations exist showing that paraclades retaining primitive state-pairs go extinct earlier than expected given null models of diversification.

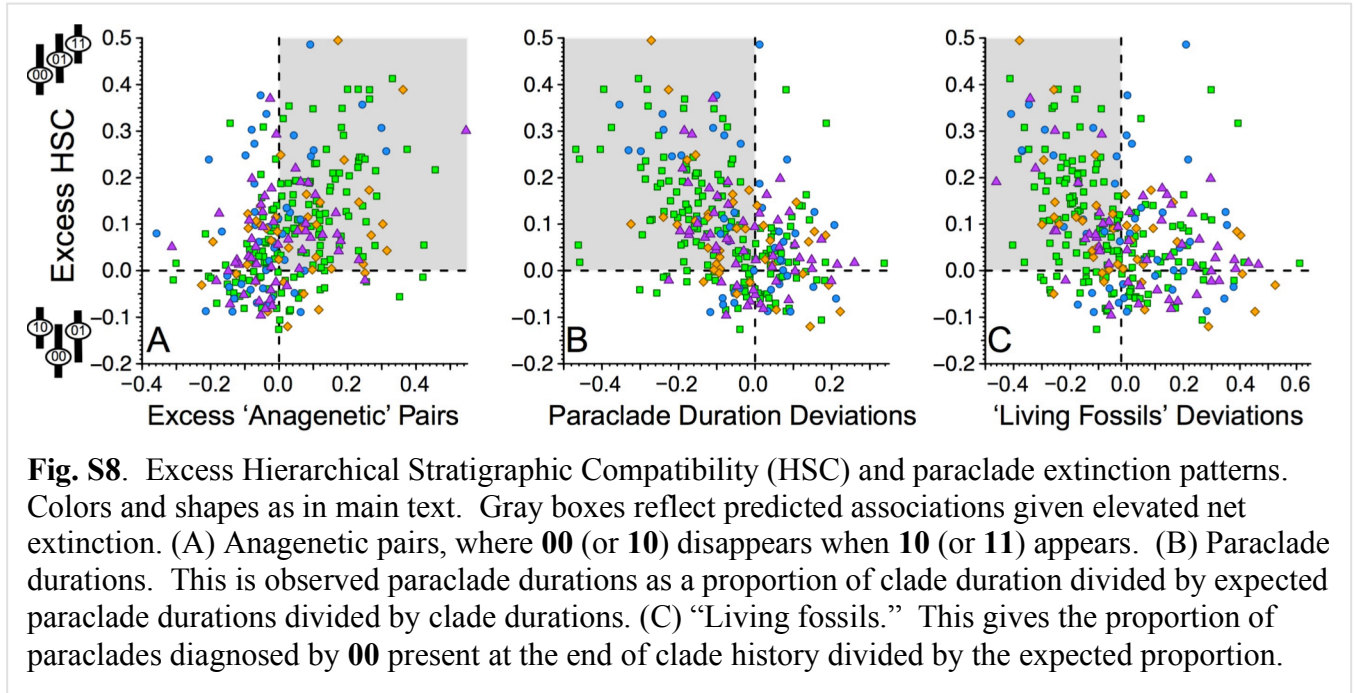

**Fig. S8.** Excess Hierarchical Stratigraphic Compatibility (HSC) and paraclade extinction patterns. Colors and shapes as in main text. Gray boxes reflect predicted associations given elevated net extinction. (A) Anagenetic pairs, where **00** (or **10**) disappears when **10** (or **11**) appears. (B) Paraclade durations. This is observed paraclade durations as a proportion of clade duration divided by expected paraclade durations divided by clade durations. (C) “Living fossils.” This gives the proportion of paraclades diagnosed by **00** present at the end of clade history divided by the expected proportion.

“Anagenetic” HSC pairs are those where the last taxa scored **00** occur in the same or prior interval as the first taxa scored **10**. (We allow for **00**-taxa and **10**-taxa to occur in the same intervals because we use broad intervals such as stages in which both anagenetic ancestor and descendant are present.) “Anagenetic” patterns tend to increase as HSC increases (Kendall’s  $\tau=0.248$ ,  $P=4.2\times 10^{-11}$ ; Fig. S8A). We measure paraclade duration as the proportion of a clade’s history that a paraclade retaining any **00** state-pair persists. Paraclade durations decrease as HSC increases (Kendall’s  $\tau=-0.298$ ,  $P=2.2\times 10^{-15}$ ; Fig. S8B). The frequency of “living fossils” (paraclades bearing **00** state-pairs extant late in clade history) is important for neontological studies. “Living fossil” paraclades decrease as HSC increases (Kendall’s  $\tau=-0.247$ ,  $P=4.8\times 10^{-11}$ ; Fig. S8C).

**Results given Bifurcating Cladogenesis.** Tests assuming bifurcating cladogenesis provide slightly more emphatic support for our conclusions (Table S3; Fig. S9). Thus, our conclusions do not depend on a particular model of speciation/cladogenesis prevailing.

**Table S3. Cases of excess Hierarchical Stratigraphic Compatibility (HSC) at Monte Carlo significance of  $P \leq 0.05$ ,  $\leq 0.25$  and  $< 0.50$  assuming Bifurcating Cladogenesis.**

| Group                  | N   | $P[\text{HSC}] \leq 0.05$    | $P[\text{HSC}] \leq 0.25$    | $P[\text{HSC}] < 0.50$        |
|------------------------|-----|------------------------------|------------------------------|-------------------------------|
| Brachiopods + Molluscs | 57  | 7 ( $7.2 \times 10^{-3}$ )   | 26 ( $2.1 \times 10^{-4}$ )  | 36 (0.017)                    |
| Arthropods             | 60  | 9 ( $7.4 \times 10^{-4}$ )   | 25 ( $1.5 \times 10^{-3}$ )  | 43 ( $2.0 \times 10^{-4}$ )   |
| Echinoderms            | 45  | 13 ( $2.3 \times 10^{-8}$ )  | 23 ( $4.4 \times 10^{-5}$ )  | 33 ( $4.1 \times 10^{-4}$ )   |
| Chordates              | 153 | 54 ( $3.2 \times 10^{-31}$ ) | 88 ( $7.7 \times 10^{-20}$ ) | 121 ( $2.9 \times 10^{-14}$ ) |

Numbers of clades from each major group showing different levels of significance for excess HSC. Numbers in parentheses give binomial probabilities of these outcomes given an expectation of uniform distributions of binomial  $P$  values.

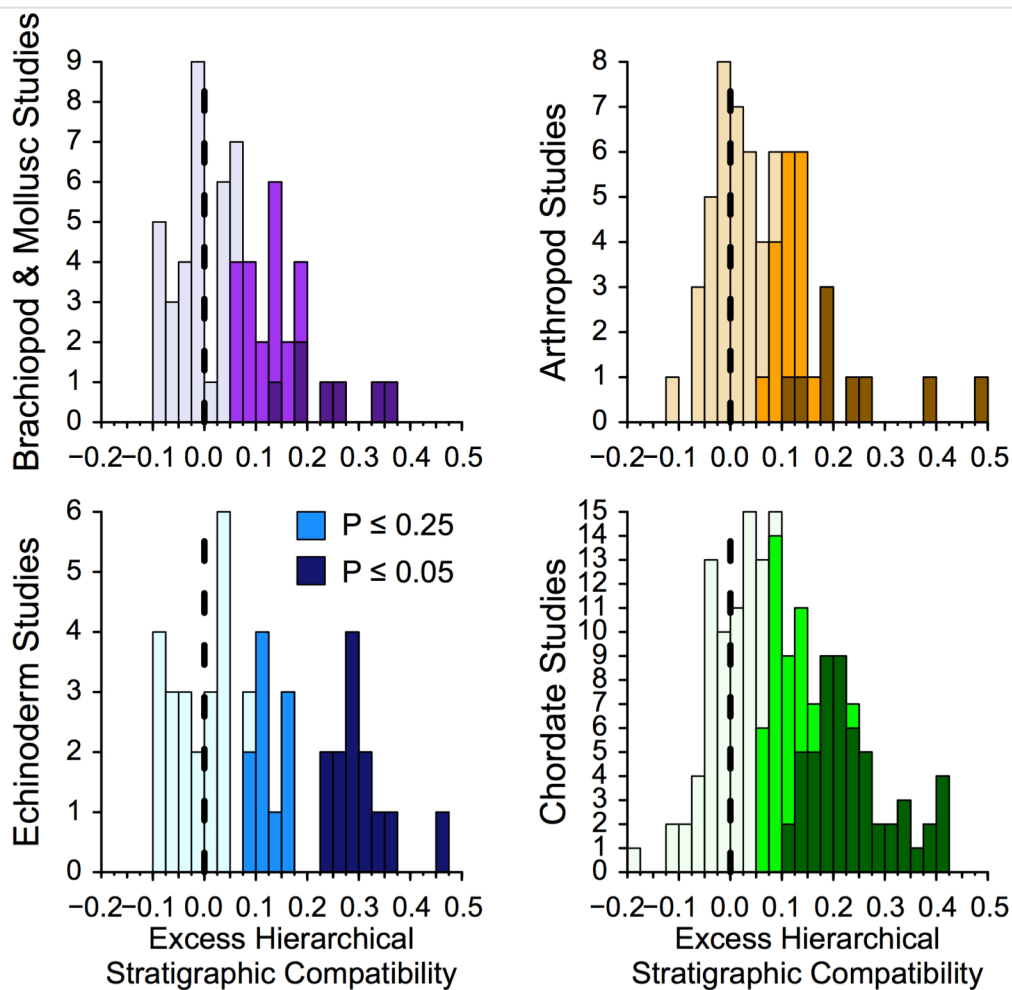

**Fig. S9.** Deviations from expectations given bifurcating cladogenesis. Observed hierarchical stratigraphic compatibility deviates even further from expectations than under the budding model. Shading denotes general significance of deviations.

**Table S4. Period-by-Period contrasts of HSC Deviations assuming Budding Cladogenesis.**

| Period        | Cm           | O            | S     | D                  | C     | P     | Tr    | J     | K                  | Pg                 | Ng                 |
|---------------|--------------|--------------|-------|--------------------|-------|-------|-------|-------|--------------------|--------------------|--------------------|
| Cambrian      | •            | 0.042        | 0.040 | $8 \times 10^{-4}$ | 0.169 | 0.015 | 0.018 | 0.026 | $5 \times 10^{-4}$ | $5 \times 10^{-4}$ | $4 \times 10^{-3}$ |
| Ordovician    | <b>0.794</b> | •            | 0.485 | 0.230              | 0.737 | 0.355 | 0.591 | 0.396 | 0.090              | 0.048              | 0.206              |
| Silurian      | <b>0.837</b> | 0.975        | •     | 0.974              | 0.540 | 0.955 | 0.547 | 0.772 | 0.935              | 0.887              | 0.766              |
| Devonian      | <b>0.689</b> | 0.943        | 1.000 | •                  | 0.281 | 0.944 | 0.681 | 0.876 | 0.964              | 0.491              | 0.761              |
| Carboniferous | 0.891        | 1.017        | 1.073 | 1.065              | •     | 0.273 | 0.662 | 0.360 | 0.156              | 0.128              | 0.234              |
| Permian       | <b>0.816</b> | 0.968        | 1.008 | 0.996              | 0.898 | •     | 0.665 | 1.000 | 0.771              | 0.646              | 0.694              |
| Triassic      | <b>0.796</b> | 0.977        | 1.071 | 1.028              | 0.950 | 1.061 | •     | 0.627 | 0.589              | 0.321              | 0.411              |
| Jurassic      | <b>0.801</b> | 0.960        | 1.031 | 1.015              | 0.898 | 1.005 | 0.962 | •     | 0.639              | 0.636              | 0.604              |
| Cretaceous    | <b>0.645</b> | 0.907        | 0.997 | 0.996              | 0.830 | 0.960 | 0.947 | 0.959 | •                  | 0.674              | 0.828              |
| Paleogene     | <b>0.644</b> | <b>0.890</b> | 0.982 | 0.942              | 0.821 | 0.943 | 0.905 | 0.962 | 0.975              | •                  | 0.982              |
| Neogene       | <b>0.778</b> | 0.952        | 0.970 | 0.987              | 0.888 | 0.960 | 0.939 | 0.963 | 0.991              | 1.000              | •                  |

Lower left gives summed ranks for the older interval divided by the expected summed ranks given the null hypothesis. Numbers less than one indicate that deviations for the older period are lower than expected given the null hypothesis. Bold values indicate “significant” differences. Upper right gives the probability of the distributions of ranked HSC deviations given the same null hypothesis as assessed by a Mann-Whitney test.

**Period-by-Period Contrasts.** The Cambrian is unique for not deviating strongly from the expectations of trait-independent diversification. Mann-Whitney tests (Table S4) show that the Cambrian deviations are significantly lower than those for all intervals other than the Cambrian. Among the remaining 45 contrasts, only Ordovician and Paleogene datasets differ significantly in excess HSC. This is well within the expectations of Type I error.

**Cambrian vs. Post-Cambrian Arthropods.** The Cambrian vs. Post-Cambrian pattern in HSC almost entirely reflects Cambrian trilobites. This distinction is very strong within arthropods alone (Fig. S10; Table S5. Cambrian arthropods fit the null expectations very well. In contrast,

**Table S5. Numbers of cases of excess Hierarchical Stratigraphic Compatibility (HSC) at Monte Carlo significance of  $P \leq 0.05$ ,  $\leq 0.25$  and  $< 0.50$  for Arthropods only.**

| Group           | N  | $P[\text{HSC}] \leq 0.05$  | $P[\text{HSC}] \leq 0.25$   | $P[\text{HSC}] < 0.50$      |
|-----------------|----|----------------------------|-----------------------------|-----------------------------|
| Cambrian        | 19 | 0 (0.377)                  | 4 (0.465)                   | 6 (0.916)                   |
| Post-Cambrian   |    |                            |                             |                             |
| All Arthropods  | 41 | 7 ( $8.5 \times 10^{-4}$ ) | 18 ( $2.4 \times 10^{-3}$ ) | 29 ( $2.2 \times 10^{-3}$ ) |
| Trilobites Only | 31 | 6 ( $7.1 \times 10^{-4}$ ) | 13 (0.012)                  | 21 (0.015)                  |

Numbers of clades from each major group showing different levels of significance for excess HSC. Numbers in parentheses give binomial probabilities of these outcomes given an expectation of uniform distributions of binomial  $P$  values.

Ordovician – Neogene arthropods deviate from null expectations as strongly as do echinoderms or vertebrates.

The bulk (30 of 40) of the post-Cambrian studies also represent trilobites. Thus, this pattern largely reflects Cambrian vs. Post-Cambrian trilobites (see also Fig. S11A below). Note, however, that Ordovician trilobites fail to show strong excess HSC patterns, too (Fig. S11A).

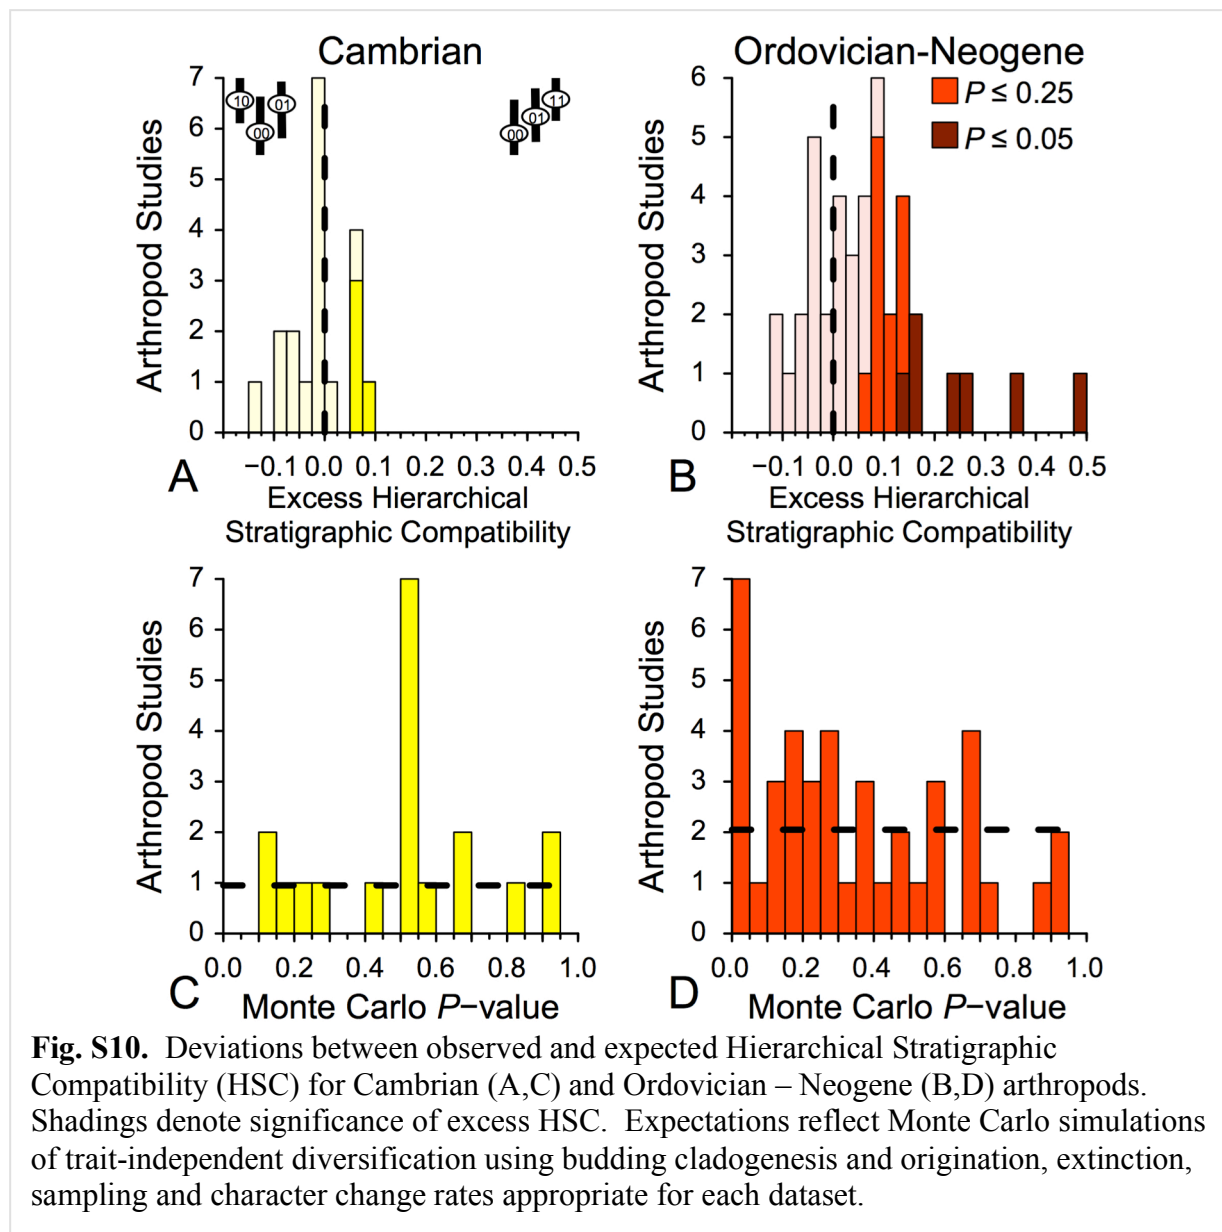



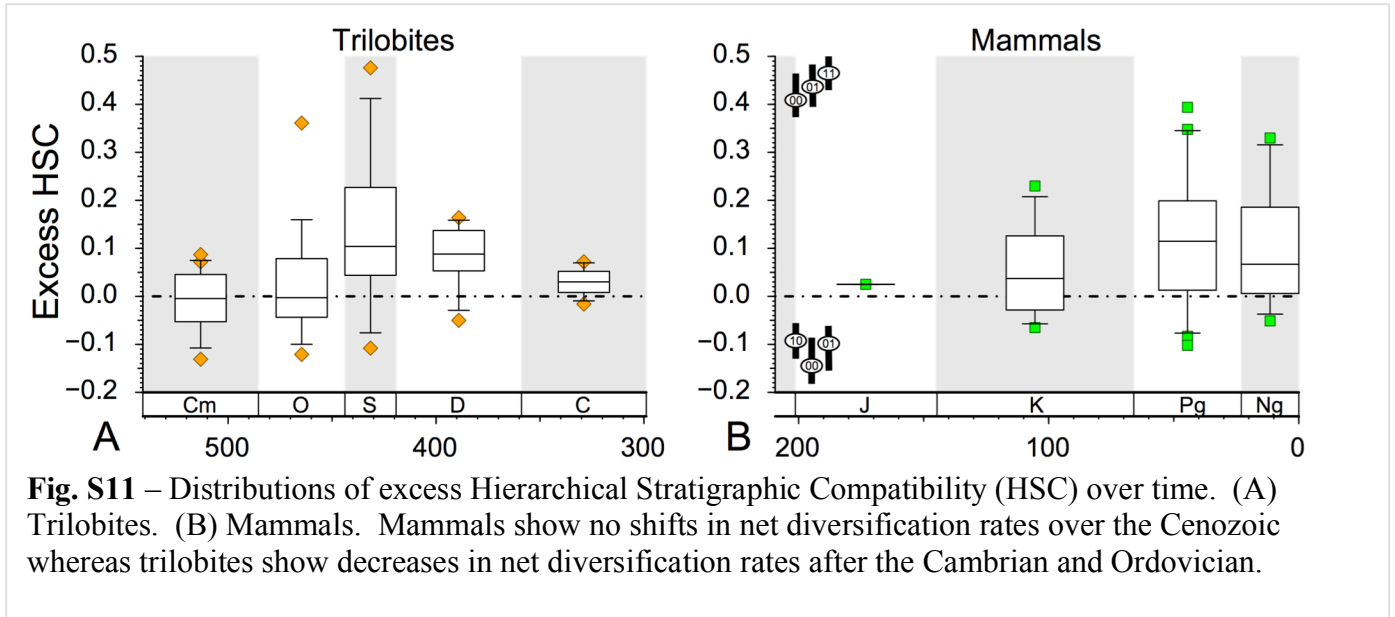

### Patterns of Hierarchical Stratigraphic Compatibility against General Patterns of

**Diversification.** Elevated net speciation posits that subclades within a larger clade sometimes produce daughter lineages at a higher rate than the rest of the clade. If elevated net speciation is a primary driver of HSC, then we do not expect to see excess HSC when net speciation rates are stable or decreasing. We illustrate two examples showing that excess HSC often is unassociated with increased diversification rates. Mammals (Fig. S11B) show considerable excess HSC throughout their history. However, net speciation rates do not show increase over that time (23). Trilobites commonly show excess HSC after the Ordovician (Fig. S11A). However, not only do net speciation rates not increase, they instead decrease (33). Conversely, HSC patterns among trilobites do not deviate from the expectations of trait-independent change when their net speciation rates are highest in the Cambrian.

### SI Discussion

**A Hypothetical Example of Coupled Logistic Diversification.** Sepkoski (27) proposed a fairly simple equation for diversification patterns of two “competing” groups:

$$\Delta S_i = R_i S_i \left(1 - \frac{S_i + c_{ij} S_j}{K}\right)$$

where  $S$  is the richness of the group,  $R$  is the “intrinsic” net diversification,  $K$  is the equilibrium richness,  $c_{ij}$  is the effect of Group  $j$  on Group  $i$ , and  $\Delta S_i$  is the expected change in richness over time for group  $i$  or  $j$ . Here we illustrate a simple hypothetical example, generated with  $R_1=R_2=1.5$ , and  $K_1=K_2=20$  (Fig. S12A). Instead of two competing clades, Group 1 represents a paraclade of taxa diagnosed by primitive condition **00** whereas Group 2 represents a derived subclade of taxa diagnosed by a derived condition **01** (Fig. S12B). Declining origination rates rather than increasing extinction rates drive the decline of the paraclade here. Moreover, net diversification rates for the *entire* clade also do not change: the decline in origination rates for the paraclade is offset by elevated rates in the subclade. The negative net diversification of a paraphyletic portion of the clade also would encourage “anagenetic” HSC by increasing the chances of the last “red” lineages bearing some **00** conditions disappears shortly after some

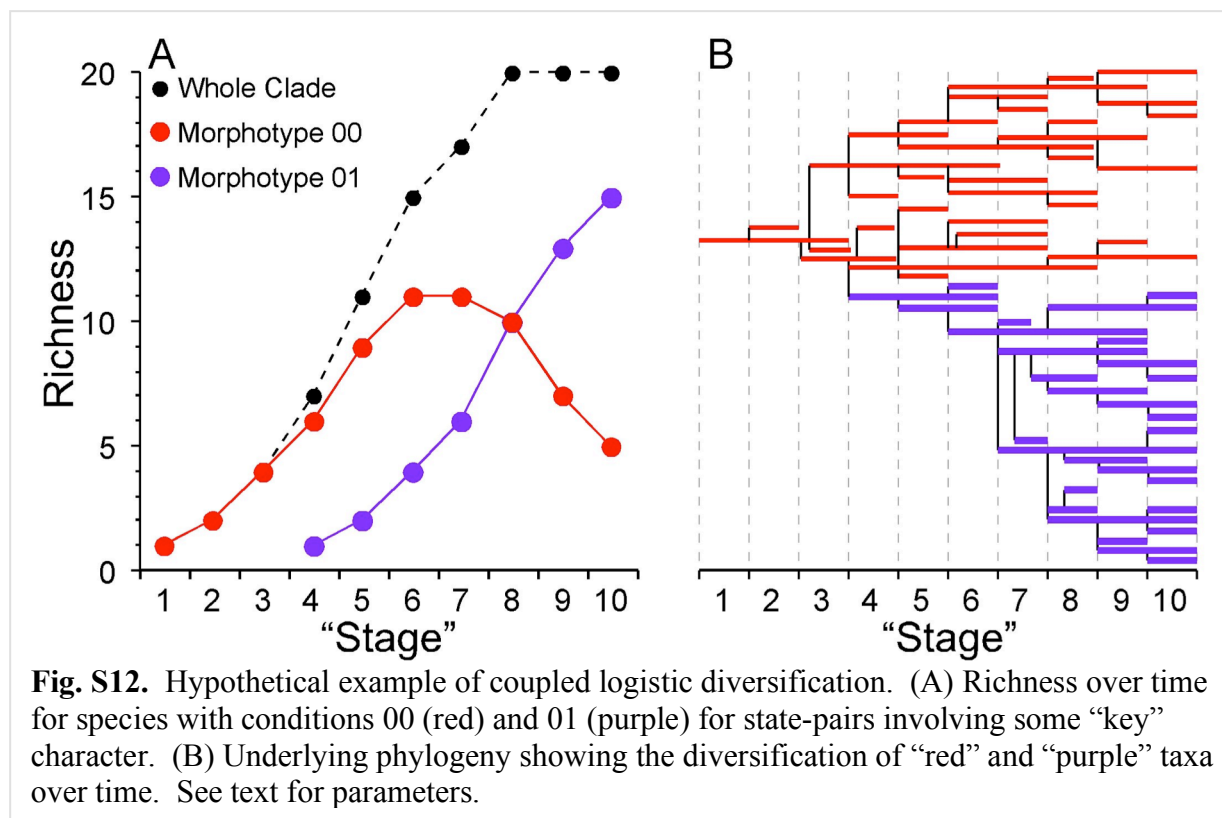

“purple” lineage bearing a new **01** condition evolves.

Finally, note that phylogenetic pattern in Fig. S12B would create the illusion of elevated net speciation if we analyzed only the taxa from the final “stage.” This reflects two things. One, because the five “living fossil” lineages from the **00** paraclade provide no evidence of greater past diversity, they will actively mislead estimates of net diversification at the base of the tree. This leads to the second problem. The boost in net diversification among the “purple” lineages now appears to be a shift in rates. However, 1) diversification rates actually are *lower* than the net diversification rates at the base of the tree, and 2) the only “new” parameters introduced are those reflecting the advantage of the purple lineages over the red lineages.

## SI Data

**Accessing NEXUS files.** The character matrices used in this study can be accessed at:

<http://www.paleobiodb.org/cgi-bin/bridge.pl?a=nexusFileSearch>. Enter “53093” under the reference number to return the relevant files (Fig. S13).

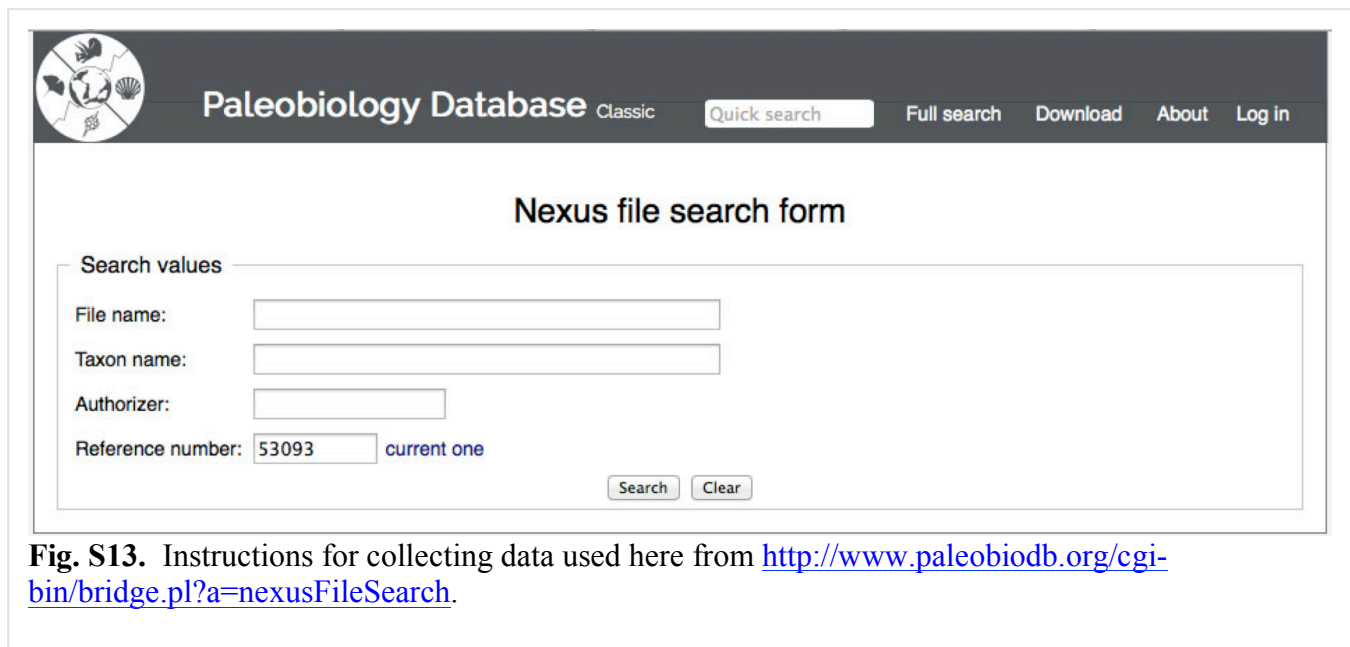

The image shows a screenshot of the Paleobiology Database website's Nexus file search form. The page header includes the Paleobiology Database logo, the text "Paleobiology Database Classic", and navigation links for "Quick search", "Full search", "Download", "About", and "Log in". The main content area is titled "Nexus file search form" and contains a "Search values" section with four input fields: "File name:", "Taxon name:", "Authorizer:", and "Reference number:". The "Reference number" field contains the value "53093" and a link labeled "current one". Below the input fields are "Search" and "Clear" buttons.

**Fig. S13.** Instructions for collecting data used here from <http://www.paleobiodb.org/cgi-bin/bridge.pl?a=nexusFileSearch>.

1. Le Quesne WJ (1969) A method of selection of characters in numerical taxonomy. *Syst Zool* 18(2):201 - 205.
2. Estabrook GF, Johnson CS, Jr., & McMorris FR (1975) An idealized concept of the true cladistic character. *Mathem Biosci* 23(2):263 - 272.
3. Stigall Rode AL (2005) Systematic revision of the Middle and Late Devonian brachiopods *Schizophoria* (*Schizophoria*) and 'Schuchertella' from North America. *J Syst Palaeontol* 3(2):133 - 167.
4. O'Keefe FR & Wagner PJ (2001) Inferring and testing hypotheses of correlated character evolution using character compatibility. *Syst Bio* 50(5):657 - 675.
5. Wagner PJ (2001) Gastropod phylogenetics: progress, problems and implications. *J Paleontol* 75(6):1128 - 1140.
6. Wagner PJ (2012) Modelling rate distributions using character compatibility: implications for morphological evolution among fossil invertebrates. *Biol Lett* 8(1):143 - 146.
7. Raup DM, Gould SJ, Schopf TJM, & Simberloff DS (1973) Stochastic models of phylogeny and the evolution of diversity. *J Geol* 81(5):525 - 542.
8. Foote M (1988) Survivorship analysis of Cambrian and Ordovician trilobites. *Paleobiology* 14(3):258 - 271.
9. Sepkoski JJ, Jr. & Kendrick DC (1993) Numerical experiments with model monophyletic and paraphyletic taxa. *Paleobiology* 19(2):168 - 184.
10. Patzkowsky ME (1995) A hierarchical branching model of evolutionary radiations. *Paleobiology* 21(4):440 - 460.
11. Wagner PJ (1996) Contrasting the underlying patterns of active trends in morphologic evolution. *Evolution* 50(3):990 - 1007.

12. Eldredge N & Gould SJ (1972) Punctuated equilibria: an alternative to phyletic gradualism. *Models in paleobiology*, ed Schopf TJM (Freeman, San Francisco), pp 82 - 115.
13. Foote M (1996) Models of morphologic diversification. *Evolutionary paleobiology: essays in honor of James W Valentine*, eds Jablonski D, Erwin DH, & Lipps JH (University of Chicago Press, Chicago), pp 62 - 86.
14. Guyer C & Slowinski JB (1991) Comparisons of observed phylogenetic topologies with null expectations among three monophyletic lineages. *Evolution* 45(2):340 - 350.
15. Wagner PJ & Erwin DH (1995) Phylogenetic patterns as tests of speciation models. *New approaches to studying speciation in the fossil record*, eds Erwin DH & Anstey RL (Columbia University Press, New York), pp 87 - 122.
16. Smith AB & Patterson C (1988) The influence of taxonomic method on the perception of patterns of evolution. *Evolutionary Biology* 23:127 - 216.
17. Foote M & Sepkoski JJ, Jr. (1999) Absolute measures of the completeness of the fossil record. *Nature* 398:415 - 417.
18. Foote M (2001) Inferring temporal patterns of preservation, origination, and extinction from taxonomic survivorship analysis. *Paleobiology* 27(4):602 - 630.
19. Wagner PJ & Marcot JD (2013) Modelling distributions of fossil sampling rates over time, space and taxa: assessment and implications for macroevolutionary studies. *Methods Ecol Evol* 4(8):703 - 713.
20. Wagner PJ (2000) Phylogenetic analyses and the fossil record: tests and inferences, hypotheses and models. *Deep time - Paleobiology's perspective*, eds Erwin DH & Wing SL (Paleontological Society, Paleobiology Memoir), Vol 26, pp 341 - 371.

21. Miller AI & Sepkoski JJ, Jr. (1988) Modeling bivalve diversification: the effect of interaction on a macroevolutionary system. *Paleobiology* 14(4):364 - 369.
22. Wagner PJ (1995) Diversification among early Paleozoic gastropods - contrasting taxonomic and phylogenetic descriptions. *Paleobiology* 21(4):410 - 439.
23. Alroy J (1996) Constant extinction, constrained diversification, and uncoordinated stasis in North American mammals. *Palaeogeogr Palaeoclimatol Palaeoecol* 127(1/4):285 - 311.
24. Brayard A, *et al.* (2009) Good genes and good luck: ammonoid diversity and the End-Permian Mass Extinction. *Science* 325(5944):1118 - 1121.
25. Rabosky DL & Lovette IJ (2008) Explosive evolutionary radiations: decreasing speciation or increasing extinction through time? *Evolution* 62(8):1866-1875.
26. Sepkoski JJ, Jr. (1978) A kinetic model of Phanerozoic taxonomic diversity. I. Analysis of marine orders. *Paleobiology* 4(2):223 - 251.
27. Sepkoski JJ, Jr. (1996) Competition in macroevolution: the double wedge revisited. *Evolutionary paleobiology: essays in honor of James W Valentine*, eds Jablonski D, Erwin DH, & Lipps JH (University of Chicago Press, Chicago), pp 211 - 255.
28. Raup DM (1985) Mathematical models of cladogenesis. *Paleobiology* 11(1):42 - 52.
29. Maurer BA (1989) Diversity-dependent species dynamics: incorporating the effects of population-level processes on species dynamics. *Paleobiology* 15(2):133 - 146.
30. Foote M (1992) Paleozoic record of morphological diversity in blastozoan echinoderms. *Proc Natl Acad Sci USA* 89(16):7325 - 7329.
31. Foote M (1991) Morphological and taxonomic diversity in a clade's history: the blastoid record and stochastic simulations. *Contrib Mus Paleontol Univ Mich* 28(6):101 - 140.

32. Wagner PJ (2000) Exhaustion of cladistic character states among fossil taxa. *Evolution* 54(2):365 - 386.
33. Webster M (2007) A Cambrian peak in morphological variation within trilobite species. *Science* 317(5837):499-502.

**Table S5. Observed vs. Expected Hierarchical Stratigraphic Compatibility (HSC)**

| Higher Taxon | Analyzed Taxon      | Per. | OTU | SCP  | Obs. HSC | E[HSC Bud] | <i>P</i> | E[HSC Bif] | <i>P</i> | Ref. |
|--------------|---------------------|------|-----|------|----------|------------|----------|------------|----------|------|
| Brachiopod   | Anopliidae          | 3    | 28  | 160  | 0.406    | 0.458      | 0.689    | 0.462      | 0.719    | 1    |
| Brachiopod   | Atrypidae           | 2    | 25  | 438  | 0.502    | 0.429      | 0.215    | 0.424      | 0.167    | 2    |
| Brachiopod   | Billingsellida      | 1    | 20  | 214  | 0.474    | 0.435      | 0.344    | 0.434      | 0.334    | 3    |
| Brachiopod   | Echinoconchidae     | 4    | 14  | 174  | 0.534    | 0.494      | 0.387    | 0.496      | 0.381    | 4    |
| Brachiopod   | <i>Floweria</i>     | 4    | 14  | 180  | 0.433    | 0.532      | 0.906    | 0.511      | 0.858    | 5    |
| Brachiopod   | <i>Kutchithyris</i> | 8    | 12  | 180  | 0.547    | 0.472      | 0.248    | 0.472      | 0.242    | 6    |
| Brachiopod   | Leptenellidae       | 2    | 23  | 103  | 0.345    | 0.429      | 0.756    | 0.441      | 0.828    | 7    |
| Brachiopod   | Leptestiidae        | 2    | 10  | 193  | 0.661    | 0.502      | 0.046    | 0.513      | 0.040    | 8    |
| Brachiopod   | Linguloidea         | 1    | 23  | 866  | 0.383    | 0.407      | 0.604    | 0.413      | 0.629    | 9    |
| Brachiopod   | <i>Orbirhynchia</i> | 9    | 16  | 162  | 0.809    | 0.514      | 0.009    | 0.461      | 0.004    | 10   |
| Brachiopod   | Parastrophinidae    | 2    | 26  | 518  | 0.486    | 0.418      | 0.234    | 0.420      | 0.234    | 11   |
| Brachiopod   | <i>Plaesiomys</i>   | 2    | 10  | 50   | 0.780    | 0.527      | 0.049    | 0.542      | 0.043    | 12   |
| Brachiopod   | <i>Schizophoria</i> | 4    | 22  | 214  | 0.584    | 0.486      | 0.176    | 0.453      | 0.085    | 5    |
| Brachiopod   | Strophomenoidea     | 2    | 14  | 33   | 0.409    | 0.500      | 0.725    | 0.500      | 0.758    | 13   |
| Brachiopod   | Terebratuloidea     | 4    | 78  | 309  | 0.388    | 0.352      | 0.376    | 0.339      | 0.317    | 14   |
| Brachiopod   | Tritoechiidae       | 2    | 13  | 394  | 0.426    | 0.526      | 0.858    | 0.498      | 0.821    | 15   |
| Brachiopod   | Virgianidae         | 2    | 12  | 449  | 0.392    | 0.476      | 0.822    | 0.477      | 0.854    | 16   |
| Rostroconch  | Conocardioidea      | 4    | 43  | 962  | 0.448    | 0.347      | 0.134    | 0.346      | 0.122    | 17   |
| Rostroconch  | Eopteriidae         | 2    | 20  | 699  | 0.522    | 0.438      | 0.155    | 0.430      | 0.113    | 17   |
| Rostroconch  | Pseudobigaleaidae   | 3    | 24  | 1731 | 0.506    | 0.458      | 0.292    | 0.401      | 0.093    | 17   |
| Rostroconch  | Ribeiriidae         | 2    | 27  | 615  | 0.498    | 0.431      | 0.230    | 0.425      | 0.183    | 17   |
| Rostroconch  | Technophoridae      | 2    | 14  | 869  | 0.498    | 0.449      | 0.318    | 0.451      | 0.287    | 17   |
| Bivalve      | Caprinoidea         | 9    | 23  | 311  | 0.706    | 0.349      | 0.004    | 0.343      | 0.006    | 18   |
| Bivalve      | Cardiidae           | 10   | 33  | 356  | 0.367    | 0.336      | 0.410    | 0.383      | 0.563    | 19   |
| Bivalve      | <i>Chione</i>       | 10   | 19  | 112  | 0.567    | 0.440      | 0.130    | 0.437      | 0.135    | 20   |
| Bivalve      | <i>Chionopsis</i>   | 10   | 19  | 164  | 0.427    | 0.420      | 0.468    | 0.430      | 0.521    | 20   |
| Bivalve      | Corbulidae          | 9    | 12  | 2828 | 0.476    | 0.491      | 0.599    | 0.489      | 0.580    | 21   |
| Bivalve      | Eucardiidae         | 9    | 20  | 156  | 0.715    | 0.441      | 0.026    | 0.461      | 0.021    | 22   |
| Bivalve      | Hippuritoidea       | 9    | 36  | 427  | 0.489    | 0.280      | 0.045    | 0.305      | 0.039    | 23   |

“Per..” gives Period of peak richness (1=Cambrian, 2=Ordovician, 3=Silurian, 4=Devonian, 5=Carboniferous, 6=Permian, 7=Triassic, 8=Jurassic, 9=Cretaceous, 10=Paleogene, 11=Neogene). OTU=number of taxa examined. SCP = Stratigraphically Compatible Pairs. E[HSC] gives expected HSC under given either budding (Bud) or Bifurcating (Bif) cladogenesis.



| Higher Taxon | Analyzed Taxon        | Per. | OTU | SCP  | Obs.  | HSC   | E[HSC Bud] | <i>P</i> | E[HSC Bif] | <i>P</i> | Ref. |
|--------------|-----------------------|------|-----|------|-------|-------|------------|----------|------------|----------|------|
| Bivalve      | <i>Leptodesma</i>     | 4    | 22  | 128  | 0.492 | 0.500 | 0.518      | 0.437    | 0.255      | 24       |      |
| Bivalve      | Megadesmidae          | 6    | 15  | 213  | 0.498 | 0.478 | 0.445      | 0.414    | 0.220      | 25       |      |
| Bivalve      | Ostreaoidea           | 9    | 34  | 439  | 0.295 | 0.304 | 0.536      | 0.316    | 0.590      | 26       |      |
| Bivalve      | Pholadidae            | 9    | 25  | 197  | 0.492 | 0.385 | 0.177      | 0.325    | 0.083      | 27       |      |
| Cephalopod   | Acanthoceratidae      | 9    | 20  | 562  | 0.482 | 0.468 | 0.447      | 0.486    | 0.517      | 28       |      |
| Cephalopod   | Ceratitida            | 6    | 32  | 891  | 0.299 | 0.365 | 0.746      | 0.383    | 0.854      | 29       |      |
| Cephalopod   | Goniatitoidea         | 5    | 13  | 244  | 0.545 | 0.381 | 0.157      | 0.369    | 0.096      | 30       |      |
| Cephalopod   | Hamitidae             | 9    | 27  | 651  | 0.326 | 0.320 | 0.484      | 0.335    | 0.538      | 31       |      |
| Cephalopod   | Hammatoceratinae      | 8    | 11  | 60   | 0.467 | 0.524 | 0.652      | 0.517    | 0.653      | 32       |      |
| Cephalopod   | Hildoceratidae        | 8    | 17  | 85   | 0.535 | 0.476 | 0.306      | 0.475    | 0.310      | 33       |      |
| Cephalopod   | Scaphitacoidea        | 9    | 13  | 189  | 0.563 | 0.397 | 0.146      | 0.392    | 0.108      | 10       |      |
| Cephalopod   | <i>Semiformiceras</i> | 8    | 11  | 110  | 0.532 | 0.566 | 0.628      | 0.535    | 0.523      | 34       |      |
| Cephalopod   | Turrilitoidea         | 9    | 26  | 316  | 0.503 | 0.320 | 0.078      | 0.322    | 0.076      | 35       |      |
| Tergomyan    | Cyrtonelloidea        | 2    | 21  | 920  | 0.486 | 0.426 | 0.226      | 0.411    | 0.175      | 36       |      |
| Gastropod    | Ancillinae            | 10   | 30  | 376  | 0.418 | 0.334 | 0.267      | 0.337    | 0.235      | 37       |      |
| Gastropod    | Bucaniidae            | 8    | 40  | 1034 | 0.346 | 0.376 | 0.631      | 0.366    | 0.580      | 36       |      |
| Gastropod    | Columbellidae         | 11   | 24  | 304  | 0.474 | 0.454 | 0.427      | 0.452    | 0.402      | 38       |      |
| Gastropod    | Eotomarioidea         | 2    | 40  | 2363 | 0.372 | 0.346 | 0.384      | 0.343    | 0.350      | 39       |      |
| Gastropod    | Harpidae              | 10   | 18  | 357  | 0.520 | 0.402 | 0.135      | 0.394    | 0.120      | 40       |      |
| Gastropod    | Hormotomidae          | 2    | 34  | 2778 | 0.308 | 0.355 | 0.713      | 0.355    | 0.746      | 39       |      |
| Gastropod    | Macluritidae          | 2    | 18  | 1434 | 0.611 | 0.436 | 0.021      | 0.431    | 0.010      | 39       |      |
| Gastropod    | Muricidae             | 10   | 18  | 566  | 0.549 | 0.399 | 0.097      | 0.404    | 0.078      | 41       |      |
| Gastropod    | Nassariidae           | 10   | 26  | 185  | 0.443 | 0.406 | 0.385      | 0.401    | 0.336      | 42       |      |
| Gastropod    | Rapaninae             | 10   | 27  | 206  | 0.379 | 0.411 | 0.630      | 0.428    | 0.692      | 43       |      |
| Gastropod    | Sinuitidae            | 2    | 16  | 465  | 0.492 | 0.437 | 0.319      | 0.437    | 0.272      | 36       |      |
| Gastropod    | Subulitoidea          | 5    | 27  | 132  | 0.386 | 0.413 | 0.613      | 0.413    | 0.626      | 44       |      |
| Gastropod    | Trochonematoidea      | 2    | 55  | 469  | 0.319 | 0.332 | 0.548      | 0.326    | 0.521      | 45, 46   |      |
| Gastropod    | Tropidodiscidae       | 2    | 22  | 596  | 0.537 | 0.413 | 0.116      | 0.405    | 0.078      | 36       |      |
| Trilobite    | Agnostoidea           | 1    | 82  | 1786 | 0.351 | 0.284 | 0.232      | 0.272    | 0.158      | 47       |      |
| Trilobite    | Agnostoidea           | 1    | 43  | 231  | 0.348 | 0.377 | 0.592      | 0.372    | 0.597      | 48       |      |
| Trilobite    | Alokistocaridae       | 1    | 19  | 1160 | 0.459 | 0.468 | 0.537      | 0.469    | 0.570      | 49       |      |
| Trilobite    | Basal Trilobita       | 1    | 17  | 241  | 0.647 | 0.557 | 0.125      | 0.531    | 0.073      | 50       |      |
| Trilobite    | Burlingiidae          | 1    | 16  | 71   | 0.570 | 0.500 | 0.285      | 0.479    | 0.229      | 51       |      |

| Higher Taxon | Analyzed Taxon             | Per. | OTU | SCP  | Obs.  | HSC   | E[HSC Bud] | <i>P</i> | E[HSC Bif] | <i>P</i> | Ref. |
|--------------|----------------------------|------|-----|------|-------|-------|------------|----------|------------|----------|------|
| Trilobite    | Emuellidae                 | 1    | 15  | 348  | 0.330 | 0.458 | 0.911      | 0.446    | 0.923      | 52       |      |
| Trilobite    | Euptychaspidinae           | 1    | 12  | 273  | 0.443 | 0.455 | 0.536      | 0.440    | 0.492      | 53       |      |
| Trilobite    | Iwayaspidinae              | 1    | 14  | 137  | 0.423 | 0.478 | 0.696      | 0.481    | 0.721      | 54       |      |
| Trilobite    | Kochaspidae                | 1    | 66  | 1344 | 0.385 | 0.447 | 0.810      | 0.380    | 0.463      | 55       |      |
| Trilobite    | Missisquoiidae             | 1    | 22  | 331  | 0.418 | 0.516 | 0.919      | 0.484    | 0.842      | 56       |      |
| Trilobite    | Nevadoidea                 | 1    | 22  | 686  | 0.493 | 0.495 | 0.511      | 0.488    | 0.467      | 57       |      |
| Trilobite    | Olenelloidea               | 1    | 26  | 921  | 0.584 | 0.509 | 0.145      | 0.480    | 0.050      | 58       |      |
| Trilobite    | Oryctocephalidae           | 1    | 22  | 493  | 0.526 | 0.458 | 0.191      | 0.451    | 0.151      | 59       |      |
| Trilobite    | Oryctocephalinae           | 1    | 24  | 189  | 0.497 | 0.503 | 0.518      | 0.464    | 0.341      | 60       |      |
| Trilobite    | Polymeroidea               | 1    | 19  | 438  | 0.372 | 0.373 | 0.504      | 0.383    | 0.556      | 61       |      |
| Trilobite    | Pterocephaliidae           | 1    | 36  | 625  | 0.397 | 0.381 | 0.434      | 0.387    | 0.461      | 62       |      |
| Trilobite    | Ptychoparioidea            | 1    | 48  | 2144 | 0.397 | 0.399 | 0.512      | 0.358    | 0.323      | 63       |      |
| Trilobite    | Wuaniidae                  | 1    | 37  | 13   | 0.385 | 0.467 | 0.658      | 0.400    | 0.529      | 64       |      |
| Trilobite    | Acanthoparyphinae          | 2    | 24  | 644  | 0.469 | 0.474 | 0.510      | 0.400    | 0.274      | 65       |      |
| Trilobite    | <i>Ceratocara</i>          | 2    | 10  | 141  | 0.564 | 0.590 | 0.594      | 0.565    | 0.507      | 66       |      |
| Trilobite    | Deiphoninae                | 2    | 21  | 115  | 0.443 | 0.489 | 0.663      | 0.460    | 0.575      | 67       |      |
| Trilobite    | Dimeropygidae              | 2    | 18  | 306  | 0.497 | 0.517 | 0.556      | 0.457    | 0.358      | 68       |      |
| Trilobite    | Illaeidae                  | 2    | 28  | 214  | 0.418 | 0.417 | 0.493      | 0.409    | 0.458      | 69       |      |
| Trilobite    | <i>Ovalocephalus</i>       | 2    | 10  | 215  | 0.853 | 0.489 | 0.001      | 0.456    | 0.001      | 70       |      |
| Trilobite    | <i>Pseudopetigurus</i>     | 2    | 17  | 210  | 0.581 | 0.486 | 0.162      | 0.456    | 0.085      | 71       |      |
| Trilobite    | <i>Pseudosphaerexochus</i> | 2    | 10  | 216  | 0.412 | 0.486 | 0.730      | 0.450    | 0.635      | 72       |      |
| Trilobite    | Reedocalymeninae           | 2    | 32  | 146  | 0.479 | 0.400 | 0.255      | 0.403    | 0.256      | 73       |      |
| Trilobite    | Shumardiidae               | 2    | 33  | 584  | 0.423 | 0.506 | 0.910      | 0.463    | 0.756      | 74       |      |
| Trilobite    | Sphaerexochinae            | 2    | 31  | 402  | 0.552 | 0.474 | 0.212      | 0.402    | 0.068      | 75       |      |
| Trilobite    | <i>Stenoblepharum</i>      | 2    | 10  | 169  | 0.521 | 0.479 | 0.357      | 0.474    | 0.336      | 76       |      |
| Trilobite    | Tetralichinae              | 2    | 11  | 104  | 0.644 | 0.542 | 0.179      | 0.520    | 0.137      | 77       |      |
| Trilobite    | Toernquistiidae            | 2    | 38  | 756  | 0.319 | 0.437 | 0.909      | 0.386    | 0.757      | 78       |      |
| Trilobite    | <i>Acanthopgye</i>         | 3    | 25  | 40   | 0.725 | 0.469 | 0.050      | 0.475    | 0.033      | 79       |      |
| Trilobite    | <i>Edgecombeaspis</i>      | 3    | 9   | 88   | 0.966 | 0.487 | <0.001     | 0.468    | <0.001     | 80       |      |
| Trilobite    | Encrinurinae               | 3    | 32  | 596  | 0.345 | 0.450 | 0.864      | 0.370    | 0.605      | 81       |      |
| Trilobite    | Odontopleuridae            | 3    | 62  | 357  | 0.457 | 0.398 | 0.283      | 0.313    | 0.075      | 82       |      |
| Trilobite    | Phacopidae                 | 3    | 50  | 311  | 0.441 | 0.401 | 0.325      | 0.385    | 0.265      | 83-85    |      |
| Trilobite    | Trochurinae                | 3    | 19  | 163  | 0.650 | 0.491 | 0.047      | 0.458    | 0.022      | 86       |      |

| Higher Taxon  | Analyzed Taxon         | Per. | OTU | SCP  | Obs.  | HSC | E[HSC Bud] | <i>P</i> | E[HSC Bif] | <i>P</i> | Ref.     |
|---------------|------------------------|------|-----|------|-------|-----|------------|----------|------------|----------|----------|
| Trilobite     | <i>Asteropyginae</i>   | 4    | 38  | 855  | 0.367 |     | 0.414      | 0.669    | 0.411      | 0.689    | 87       |
| Trilobite     | <i>Basidechenella</i>  | 4    | 16  | 186  | 0.581 |     | 0.496      | 0.195    | 0.454      | 0.078    | 88       |
| Trilobite     | <i>Dechenella</i>      | 4    | 17  | 598  | 0.607 |     | 0.472      | 0.049    | 0.470      | 0.039    | 88       |
| Trilobite     | <i>Koneprusiinae</i>   | 4    | 39  | 116  | 0.647 |     | 0.500      | 0.084    | 0.455      | 0.046    | 89       |
| Trilobite     | <i>Malvinella</i>      | 4    | 14  | 817  | 0.537 |     | 0.520      | 0.413    | 0.520      | 0.424    | 90       |
| Trilobite     | <i>Metacryphaeus</i>   | 4    | 17  | 525  | 0.635 |     | 0.468      | 0.030    | 0.448      | 0.018    | 91       |
| Trilobite     | Proetidae              | 4    | 21  | 696  | 0.514 |     | 0.422      | 0.171    | 0.419      | 0.155    | 88       |
| Trilobite     | <i>Trimerocephalus</i> | 4    | 14  | 294  | 0.558 |     | 0.488      | 0.295    | 0.409      | 0.085    | 92       |
| Trilobite     | <i>Kaskia</i>          | 5    | 19  | 146  | 0.449 |     | 0.462      | 0.548    | 0.451      | 0.507    | 93       |
| Trilobite     | Phillipsidae           | 5    | 21  | 108  | 0.532 |     | 0.457      | 0.287    | 0.460      | 0.273    | 94, 95   |
| Trilobite     | Lichoidea              | 2    | 36  | 804  | 0.521 |     | 0.413      | 0.118    | 0.412      | 0.090    | 96       |
| Chelicerate   | Adelophthalmoidea      | 3    | 12  | 155  | 0.629 |     | 0.496      | 0.121    | 0.465      | 0.067    | 97       |
| Chelicerate   | Cambrian Arachnomorpha | 1    | 24  | 742  | 0.357 |     | 0.384      | 0.593    | 0.379      | 0.604    | 98       |
| Chelicerate   | Eurypetriidae          | 3    | 23  | 660  | 0.472 |     | 0.449      | 0.393    | 0.455      | 0.405    | 99       |
| Chelicerate   | <i>Eurypterus</i>      | 3    | 13  | 144  | 0.562 |     | 0.513      | 0.369    | 0.474      | 0.259    | 100      |
| Chelicerate   | Stylonurina            | 3    | 23  | 631  | 0.368 |     | 0.408      | 0.660    | 0.397      | 0.617    | 101      |
| Crustacean    | Astacidae              | 8    | 17  | 253  | 0.731 |     | 0.498      | 0.005    | 0.472      | <0.001   | 102      |
| Crustacean    | Astacidae              | 8    | 23  | 375  | 0.488 |     | 0.357      | 0.134    | 0.380      | 0.155    | 103      |
| Crustacean    | Beyrichiocopa          | 2    | 34  | 464  | 0.417 |     | 0.339      | 0.201    | 0.333      | 0.174    | 104      |
| Crustacean    | Phyllocarida           | 4    | 41  | 1288 | 0.503 |     | 0.431      | 0.236    | 0.359      | 0.052    | 105      |
| Crustacean    | Thylacocephala         | 4    | 18  | 125  | 0.548 |     | 0.538      | 0.474    | 0.505      | 0.317    | 106      |
| Crustacean    | Xanthoidea             | 10   | 21  | 1255 | 0.399 |     | 0.450      | 0.697    | 0.373      | 0.386    | 107      |
| Stylophoran   | Anomalocystitidae      | 2    | 20  | 2267 | 0.374 |     | 0.478      | 0.892    | 0.439      | 0.807    | 108      |
| Stylophoran   | Chauvelicystinae       | 2    | 12  | 73   | 0.637 |     | 0.553      | 0.244    | 0.515      | 0.168    | 109      |
| Stylophoran   | Cincta                 | 1    | 21  | 1702 | 0.427 |     | 0.459      | 0.622    | 0.396      | 0.364    | 110      |
| Stylophoran   | Cornuta                | 2    | 32  | 1662 | 0.364 |     | 0.415      | 0.707    | 0.353      | 0.443    | 111      |
| Stylophoran   | Cornuta                | 2    | 22  | 383  | 0.520 |     | 0.424      | 0.227    | 0.363      | 0.073    | 112      |
| Stylophoran   | Cornuta                | 2    | 28  | 226  | 0.416 |     | 0.433      | 0.555    | 0.377      | 0.343    | 113      |
| Stylophoran   | Dendrocystitidae       | 2    | 15  | 107  | 0.561 |     | 0.492      | 0.285    | 0.446      | 0.148    | 114, 115 |
| Stylophoran   | Mitrata                | 2    | 13  | 577  | 0.791 |     | 0.455      | 0.005    | 0.420      | <0.001   | 116      |
| Stylophoran   | Mitrata                | 2    | 17  | 4167 | 0.433 |     | 0.486      | 0.728    | 0.435      | 0.508    | 117      |
| Stylophoran   | Stylophora             | 2    | 42  | 1966 | 0.446 |     | 0.337      | 0.107    | 0.318      | 0.069    | 114      |
| Edrioasteroid | Agelacrinitinae        | 4    | 10  | 30   | 1.000 |     | 0.516      | 0.004    | 0.526      | 0.005    | 118      |

| Higher Taxon  | Analyzed Taxon        | Per. | OTU | SCP  | Obs.  | HSC   | E[HSC Bud] | <i>P</i> | E[HSC Bif] | <i>P</i> | Ref. |
|---------------|-----------------------|------|-----|------|-------|-------|------------|----------|------------|----------|------|
| Edrioasteroid | Edrioasteroidea       | 2    | 15  | 192  | 0.776 | 0.474 | 0.021      | 0.476    | 0.022      | 119      |      |
| Edrioasteroid | Isorophida            | 2    | 11  | 42   | 0.631 | 0.454 | 0.099      | 0.459    | 0.071      | 120      |      |
| Asterozoan    | Asterozoa             | 2    | 36  | 7260 | 0.350 | 0.350 | 0.508      | 0.321    | 0.365      | 121      |      |
| Asterozoan    | Goniasteridae         | 8    | 21  | 1151 | 0.424 | 0.496 | 0.795      | 0.450    | 0.638      | 122      |      |
| Blastozoan    | Blastoidea            | 4    | 68  | 2863 | 0.390 | 0.341 | 0.272      | 0.340    | 0.254      | 123      |      |
| Blastozoan    | Glyptocystitidae      | 3    | 11  | 109  | 0.766 | 0.518 | 0.008      | 0.497    | 0.003      | 124      |      |
| Blastozoan    | Pleurocystitidae      | 2    | 12  | 147  | 0.782 | 0.524 | 0.033      | 0.507    | 0.033      | 125      |      |
| Crinoid       | Basal Crinoidea       | 2    | 33  | 143  | 0.409 | 0.437 | 0.603      | 0.441    | 0.634      | 126      |      |
| Crinoid       | Botryocrinidae        | 5    | 13  | 88   | 0.369 | 0.450 | 0.759      | 0.456    | 0.798      | 127      |      |
| Crinoid       | Calceocrinidae        | 3    | 22  | 99   | 0.692 | 0.454 | 0.045      | 0.455    | 0.025      | 128      |      |
| Crinoid       | Camerata              | 2    | 28  | 439  | 0.432 | 0.414 | 0.420      | 0.421    | 0.453      | 129      |      |
| Crinoid       | Cladida               | 2    | 27  | 308  | 0.305 | 0.372 | 0.764      | 0.391    | 0.850      | 129      |      |
| Crinoid       | Cupulocrinidae        | 2    | 13  | 237  | 0.741 | 0.527 | 0.024      | 0.461    | 0.001      | 130      |      |
| Crinoid       | <i>Cyathocrinites</i> | 5    | 14  | 74   | 0.399 | 0.514 | 0.846      | 0.459    | 0.708      | 131      |      |
| Crinoid       | Disparida             | 2    | 45  | 648  | 0.299 | 0.349 | 0.720      | 0.355    | 0.770      | 129      |      |
| Crinoid       | <i>Mespilocrinus</i>  | 5    | 10  | 40   | 0.562 | 0.508 | 0.363      | 0.449    | 0.234      | 132      |      |
| Crinoid       | Pereichocrinidae      | 4    | 20  | 258  | 0.391 | 0.457 | 0.788      | 0.473    | 0.851      | 133      |      |
| Echinoid      | Arbacoidea            | 9    | 21  | 749  | 0.730 | 0.395 | 0.011      | 0.410    | 0.005      | 134      |      |
| Echinoid      | Arbacoidea            | 7    | 25  | 224  | 0.538 | 0.410 | 0.109      | 0.384    | 0.063      | 135      |      |
| Echinoid      | Cassiduloidea         | 9    | 69  | 620  | 0.318 | 0.281 | 0.362      | 0.274    | 0.309      | 136      |      |
| Echinoid      | Cassiduloidea         | 9    | 49  | 382  | 0.651 | 0.277 | 0.001      | 0.309    | <0.001     | 137      |      |
| Echinoid      | Clypeasteroidea       | 9    | 43  | 695  | 0.355 | 0.298 | 0.304      | 0.319    | 0.346      | 138      |      |
| Echinoid      | Disasteroidea         | 9    | 26  | 189  | 0.696 | 0.391 | 0.007      | 0.411    | 0.016      | 139      |      |
| Echinoid      | Holasteroidea         | 9    | 43  | 478  | 0.341 | 0.319 | 0.430      | 0.338    | 0.489      | 140      |      |
| Echinoid      | Hypsaliinae           | 9    | 10  | 44   | 0.568 | 0.489 | 0.297      | 0.471    | 0.259      | 134      |      |
| Echinoid      | Irregularia           | 8    | 27  | 401  | 0.613 | 0.376 | 0.011      | 0.386    | 0.013      | 141      |      |
| Echinoid      | Loveniidae            | 10   | 14  | 626  | 0.450 | 0.484 | 0.654      | 0.485    | 0.696      | 142      |      |
| Echinoid      | Mesozoic Echinoidea   | 7    | 46  | 1471 | 0.444 | 0.323 | 0.107      | 0.331    | 0.081      | 143      |      |
| Echinoid      | Ordovician Echinoidea | 2    | 11  | 206  | 0.745 | 0.474 | 0.015      | 0.467    | 0.003      | 144      |      |
| Echinoid      | Somaliasteridae       | 9    | 19  | 190  | 0.479 | 0.386 | 0.232      | 0.394    | 0.244      | 145      |      |
| Echinoid      | Spatangoidea          | 10   | 50  | 1910 | 0.410 | 0.287 | 0.116      | 0.319    | 0.126      | 146      |      |
| Echinoid      | Spatangoidea          | 9    | 37  | 635  | 0.350 | 0.361 | 0.544      | 0.373    | 0.601      | 147      |      |
| Echinoid      | Temnopleuridae        | 10   | 16  | 400  | 0.360 | 0.453 | 0.819      | 0.441    | 0.844      | 148      |      |

| Higher Taxon    | Analyzed Taxon               | Per. | OTU | SCP  | Obs.  | HSC   | E[HSC Bud] | P     | E[HSC Bif] | P        | Ref. |
|-----------------|------------------------------|------|-----|------|-------|-------|------------|-------|------------|----------|------|
| Echinoid        | Toxasteridae                 | 8    | 35  | 474  | 0.661 | 0.367 | 0.003      | 0.340 | 0.001      | 149      |      |
| Conodont        | <i>Hindeodus-Isarcicella</i> | 6    | 21  | 113  | 0.465 | 0.389 | 0.275      | 0.402 | 0.307      | 150      |      |
| Conodont        | <i>Kockelella</i>            | 3    | 17  | 311  | 0.595 | 0.453 | 0.070      | 0.446 | 0.035      | 151      |      |
| Conodont        | <i>Palmatolepis</i>          | 4    | 15  | 233  | 0.442 | 0.424 | 0.467      | 0.383 | 0.308      | 152      |      |
| Cephalaspid     | Thyestiidae                  | 3    | 18  | 274  | 0.478 | 0.508 | 0.628      | 0.513 | 0.639      | 153      |      |
| Pteraspid       | Pteraspidiformes             | 4    | 26  | 902  | 0.639 | 0.447 | 0.005      | 0.443 | 0.004      | 154      |      |
| Placoderm       | Actinolepidae                | 3    | 18  | 446  | 0.410 | 0.443 | 0.617      | 0.407 | 0.486      | 155      |      |
| Placoderm       | Arthrodira                   | 4    | 31  | 731  | 0.486 | 0.428 | 0.304      | 0.429 | 0.268      | 156      |      |
| Placoderm       | Bothriolepidae               | 4    | 12  | 100  | 0.650 | 0.403 | 0.109      | 0.413 | 0.107      | 157      |      |
| Placoderm       | Eubrachythoraci              | 4    | 19  | 799  | 0.557 | 0.494 | 0.194      | 0.485 | 0.161      | 158      |      |
| Placoderm       | Phyllolepidae                | 4    | 38  | 940  | 0.457 | 0.385 | 0.235      | 0.380 | 0.197      | 159      |      |
| Placoderm       | Selenosteidae                | 4    | 10  | 62   | 0.476 | 0.509 | 0.613      | 0.491 | 0.564      | 160      |      |
| Chondrichthian  | Basal Chondrichthyes         | 5    | 10  | 74   | 0.493 | 0.489 | 0.491      | 0.489 | 0.489      | 161      |      |
| Actinopterygian | Amblypteridae                | 5    | 50  | 771  | 0.694 | 0.402 | <0.001     | 0.340 | <0.001     | 162      |      |
| Actinopterygian | Amiidae                      | 10   | 21  | 771  | 0.350 | 0.372 | 0.560      | 0.313 | 0.341      | 163      |      |
| Actinopterygian | Basal Teleostei              | 8    | 26  | 7451 | 0.557 | 0.381 | 0.025      | 0.358 | 0.015      | 164, 165 |      |
| Actinopterygian | Devonian Palaeonisciformes   | 4    | 15  | 821  | 0.523 | 0.521 | 0.492      | 0.453 | 0.207      | 166      |      |
| Actinopterygian | Ginglymodi                   | 10   | 27  | 1869 | 0.428 | 0.412 | 0.439      | 0.398 | 0.389      | 167, 168 |      |
| Actinopterygian | Osteoglossomorphes           | 7    | 18  | 1392 | 0.449 | 0.466 | 0.608      | 0.473 | 0.639      | 169      |      |
| Actinopterygian | Perleidiformes               | 7    | 14  | 240  | 0.433 | 0.498 | 0.756      | 0.463 | 0.633      | 167      |      |
| Actinopterygian | Scanalepiformes              | 4    | 13  | 1014 | 0.470 | 0.473 | 0.507      | 0.430 | 0.353      | 170      |      |
| Actinopterygian | Tetradontiformes             | 4    | 36  | 1688 | 0.547 | 0.440 | 0.122      | 0.384 | 0.025      | 171      |      |
| Sarcopterygian  | Basal Sarcopterygia          | 5    | 32  | 6829 | 0.443 | 0.385 | 0.285      | 0.392 | 0.281      | 172      |      |
| Sarcopterygian  | Basal Sarcopterygia          | 5    | 25  | 6580 | 0.472 | 0.408 | 0.240      | 0.413 | 0.243      | 173      |      |
| Sarcopterygian  | Coelocanthiformes            | 5    | 30  | 1535 | 0.533 | 0.457 | 0.193      | 0.416 | 0.074      | 174      |      |
| Sarcopterygian  | Coelocanthiformes            | 7    | 24  | 3201 | 0.739 | 0.430 | <0.001     | 0.433 | <0.001     | 175, 176 |      |
| Sarcopterygian  | Devonian Dipnoi              | 4    | 26  | 1164 | 0.573 | 0.419 | 0.065      | 0.413 | 0.040      | 177      |      |
| Sarcopterygian  | Mesozoic Dipnoi              | 4    | 16  | 100  | 0.890 | 0.495 | <0.001     | 0.468 | <0.001     | 178      |      |
| Sarcopterygian  | Rhipidistia                  | 10   | 30  | 3196 | 0.603 | 0.401 | 0.014      | 0.401 | 0.010      | 179      |      |
| Tetrapod        | Early Tetrapoda              | 5    | 21  | 4646 | 0.714 | 0.504 | 0.001      | 0.457 | <0.001     | 180      |      |
| Temnospondyl    | Basal Temnospondyli          | 5    | 10  | 1047 | 0.455 | 0.531 | 0.780      | 0.476 | 0.589      | 181      |      |
| Temnospondyl    | Brachyopoidea                | 6    | 21  | 634  | 0.421 | 0.465 | 0.720      | 0.431 | 0.555      | 182, 183 |      |
| Temnospondyl    | Branchiosauridae             | 6    | 19  | 484  | 0.606 | 0.419 | 0.044      | 0.415 | 0.025      | 184      |      |

| Higher Taxon | Analyzed Taxon         | Per. | OTU | SCP   | Obs.  | HSC | E[HSC Bud] | <i>P</i> | E[HSC Bif] | <i>P</i> | Ref.     |
|--------------|------------------------|------|-----|-------|-------|-----|------------|----------|------------|----------|----------|
| Temnospondyl | Capitosauria           | 7    | 22  | 648   | 0.596 |     | 0.449      | 0.077    | 0.384      | 0.010    | 185      |
| Temnospondyl | Capitosauridae         | 6    | 11  | 333   | 0.683 |     | 0.524      | 0.029    | 0.517      | 0.015    | 186      |
| Temnospondyl | Dvinosauridae          | 5    | 10  | 858   | 0.528 |     | 0.518      | 0.446    | 0.512      | 0.409    | 187      |
| Temnospondyl | Edopoidea              | 5    | 15  | 304   | 0.704 |     | 0.535      | 0.016    | 0.519      | 0.006    | 188, 189 |
| Temnospondyl | Mastodonsauroida       | 6    | 21  | 292   | 0.560 |     | 0.471      | 0.214    | 0.464      | 0.186    | 190      |
| Temnospondyl | Rhytidosteoidea        | 6    | 11  | 52    | 0.740 |     | 0.530      | 0.068    | 0.445      | 0.022    | 191      |
| Temnospondyl | Stegocephalia          | 5    | 16  | 818   | 0.416 |     | 0.501      | 0.909    | 0.480      | 0.851    | 192      |
| Temnospondyl | Stereospondylia        | 6    | 15  | 1965  | 0.544 |     | 0.464      | 0.196    | 0.464      | 0.179    | 193      |
| Synapsid     | Basal Synapsida        | 6    | 17  | 619   | 0.448 |     | 0.524      | 0.827    | 0.481      | 0.668    | 194      |
| Synapsid     | Varanopidae            | 7    | 10  | 50    | 0.660 |     | 0.576      | 0.263    | 0.556      | 0.207    | 195      |
| Synapsid     | Anomodontia            | 6    | 30  | 2241  | 0.422 |     | 0.449      | 0.619    | 0.386      | 0.324    | 196, 197 |
| Synapsid     | Cynodontia             | 6    | 16  | 1155  | 0.494 |     | 0.458      | 0.351    | 0.435      | 0.252    | 198      |
| Synapsid     | Dicynodontia           | 7    | 29  | 1620  | 0.458 |     | 0.411      | 0.300    | 0.403      | 0.240    | 199      |
| Synapsid     | Eutheriodontia         | 7    | 23  | 2648  | 0.621 |     | 0.464      | 0.025    | 0.410      | 0.004    | 200      |
| Synapsid     | Eutherocephalia        | 7    | 21  | 1629  | 0.378 |     | 0.475      | 0.863    | 0.426      | 0.709    | 201; 202 |
| Synapsid     | Traversodontidae       | 7    | 16  | 511   | 0.634 |     | 0.455      | 0.023    | 0.455      | 0.024    | 203, 204 |
| Synapsid     | Amphilestidae          | 9    | 20  | 1381  | 0.339 |     | 0.402      | 0.760    | 0.397      | 0.761    | 205      |
| Synapsid     | Anomaluroidea          | 10   | 14  | 4889  | 0.610 |     | 0.503      | 0.112    | 0.462      | 0.026    | 206      |
| Synapsid     | Anthracotheriidae      | 10   | 9   | 95    | 0.421 |     | 0.464      | 0.601    | 0.454      | 0.588    | 207      |
| Synapsid     | Arctoidea              | 10   | 20  | 375   | 0.327 |     | 0.427      | 0.876    | 0.422      | 0.895    | 208      |
| Synapsid     | Basal Aplodontioidea   | 10   | 61  | 11758 | 0.507 |     | 0.394      | 0.040    | 0.378      | 0.020    | 209      |
| Synapsid     | Basal Cetacea          | 10   | 17  | 714   | 0.676 |     | 0.459      | 0.010    | 0.463      | 0.008    | 210      |
| Synapsid     | Basal Ctenodactyloidea | 10   | 14  | 185   | 0.535 |     | 0.467      | 0.283    | 0.458      | 0.216    | 211      |
| Synapsid     | Basal Ruminantia       | 10   | 10  | 292   | 0.522 |     | 0.489      | 0.367    | 0.487      | 0.362    | 212      |
| Synapsid     | Borhyaenoidea          | 10   | 10  | 493   | 0.792 |     | 0.447      | 0.008    | 0.450      | 0.010    | 213      |
| Synapsid     | Borophaginae           | 10   | 66  | 3528  | 0.431 |     | 0.285      | 0.037    | 0.279      | 0.029    | 214      |
| Synapsid     | Brontotheriidae        | 10   | 47  | 3113  | 0.658 |     | 0.354      | <0.001   | 0.343      | <0.001   | 215      |
| Synapsid     | Carnivoramorpha        | 10   | 24  | 2210  | 0.542 |     | 0.412      | 0.086    | 0.416      | 0.060    | 216      |
| Synapsid     | Carpolestidae          | 10   | 13  | 392   | 0.801 |     | 0.451      | 0.001    | 0.453      | 0.003    | 217      |
| Synapsid     | Ceratomorpha           | 10   | 22  | 273   | 0.438 |     | 0.429      | 0.481    | 0.430      | 0.480    | 218      |
| Synapsid     | Chalicotheriidae       | 10   | 17  | 814   | 0.452 |     | 0.471      | 0.603    | 0.476      | 0.623    | 219      |
| Synapsid     | <i>Cormohipparion</i>  | 11   | 12  | 1356  | 0.749 |     | 0.519      | 0.008    | 0.480      | 0.001    | 220      |
| Synapsid     | Cretaceous Eutheria    | 9    | 23  | 2170  | 0.551 |     | 0.455      | 0.120    | 0.452      | 0.112    | 221      |

| Higher Taxon | Analyzed Taxon   | Per. | OTU | SCP   | Obs.  | HSC   | E[HSC Bud] | <i>P</i> | E[HSC Bif] | <i>P</i> | Ref. |
|--------------|------------------|------|-----|-------|-------|-------|------------|----------|------------|----------|------|
| Synapsid     | Dichobunidae     | 10   | 23  | 186   | 0.672 | 0.473 | 0.018      | 0.433    | 0.009      | 222      |      |
| Synapsid     | Didolodontidae   | 10   | 13  | 74    | 0.541 | 0.464 | 0.325      | 0.402    | 0.175      | 223      |      |
| Synapsid     | Elephantiformes  | 11   | 31  | 1101  | 0.658 | 0.347 | 0.002      | 0.360    | 0.001      | 224      |      |
| Synapsid     | Eocene Equidae   | 10   | 18  | 1325  | 0.830 | 0.434 | <0.001     | 0.420    | <0.001     | 225      |      |
| Synapsid     | Eotheria         | 8    | 21  | 1341  | 0.433 | 0.408 | 0.423      | 0.413    | 0.396      | 226      |      |
| Synapsid     | Equidae          | 10   | 17  | 1151  | 0.712 | 0.479 | 0.002      | 0.442    | <0.001     | 227      |      |
| Synapsid     | Equinae          | 11   | 19  | 506   | 0.539 | 0.492 | 0.303      | 0.457    | 0.176      | 228      |      |
| Synapsid     | Hathliacynidae   | 10   | 10  | 658   | 0.742 | 0.486 | 0.003      | 0.496    | 0.004      | 229      |      |
| Synapsid     | Hippopotamidae   | 10   | 16  | 366   | 0.548 | 0.444 | 0.160      | 0.442    | 0.136      | 230      |      |
| Synapsid     | Hippotragini     | 11   | 15  | 181   | 0.395 | 0.421 | 0.579      | 0.420    | 0.589      | 231      |      |
| Synapsid     | Hominidae        | 11   | 14  | 4309  | 0.581 | 0.526 | 0.197      | 0.499    | 0.070      | 232      |      |
| Synapsid     | Hominoidea       | 11   | 14  | 4783  | 0.722 | 0.526 | <0.001     | 0.515    | <0.001     | 233      |      |
| Synapsid     | Hyaenidae        | 11   | 18  | 77    | 0.494 | 0.452 | 0.375      | 0.446    | 0.354      | 234      |      |
| Synapsid     | Hyaenodontida    | 10   | 34  | 983   | 0.551 | 0.373 | 0.018      | 0.366    | 0.011      | 235, 236 |      |
| Synapsid     | Hypsodontidae    | 10   | 11  | 239   | 0.435 | 0.502 | 0.751      | 0.467    | 0.640      | 237      |      |
| Synapsid     | Louisinidae      | 10   | 22  | 2712  | 0.560 | 0.452 | 0.083      | 0.445    | 0.047      | 238      |      |
| Synapsid     | Machairodontinae | 11   | 12  | 399   | 0.695 | 0.526 | 0.021      | 0.489    | 0.009      | 239      |      |
| Synapsid     | Megalochinidae   | 11   | 14  | 770   | 0.569 | 0.482 | 0.144      | 0.484    | 0.130      | 240      |      |
| Synapsid     | Megalonychidae   | 11   | 14  | 106   | 0.524 | 0.523 | 0.499      | 0.491    | 0.381      | 241      |      |
| Synapsid     | Mioclaenidae     | 10   | 31  | 831   | 0.412 | 0.399 | 0.450      | 0.391    | 0.411      | 242      |      |
| Synapsid     | Multituberculata | 9    | 32  | 1424  | 0.702 | 0.470 | <0.001     | 0.466    | <0.001     | 243      |      |
| Synapsid     | Mustellidae      | 11   | 9   | 743   | 0.518 | 0.528 | 0.540      | 0.496    | 0.378      | 244      |      |
| Synapsid     | Mysticetiidae    | 11   | 32  | 9722  | 0.498 | 0.390 | 0.117      | 0.388    | 0.086      | 245      |      |
| Synapsid     | Nimravinae       | 10   | 11  | 428   | 0.463 | 0.494 | 0.612      | 0.498    | 0.644      | 246      |      |
| Synapsid     | Notohippidae     | 10   | 17  | 309   | 0.579 | 0.380 | 0.082      | 0.359    | 0.045      | 247      |      |
| Synapsid     | Odobenidae       | 11   | 15  | 1157  | 0.777 | 0.445 | 0.003      | 0.445    | 0.001      | 248      |      |
| Synapsid     | Omomyidae        | 10   | 29  | 35489 | 0.356 | 0.437 | 0.851      | 0.390    | 0.673      | 249      |      |
| Synapsid     | Paucituberculata | 10   | 21  | 713   | 0.616 | 0.525 | 0.157      | 0.475    | 0.045      | 250      |      |
| Synapsid     | Perissodactyla   | 10   | 10  | 467   | 0.498 | 0.487 | 0.442      | 0.487    | 0.452      | 237      |      |
| Synapsid     | Protoselendonta  | 10   | 23  | 186   | 0.672 | 0.480 | 0.040      | 0.437    | 0.008      | 251      |      |
| Synapsid     | Selenodonta      | 10   | 22  | 1107  | 0.696 | 0.472 | <0.001     | 0.469    | <0.001     | 252      |      |
| Synapsid     | Splacotheriidae  | 9    | 11  | 132   | 0.564 | 0.579 | 0.541      | 0.549    | 0.446      | 253      |      |
| Synapsid     | Taeniodonta      | 10   | 10  | 723   | 0.632 | 0.509 | 0.059      | 0.503    | 0.055      | 254      |      |

| Higher Taxon   | Analyzed Taxon        | Per. | OTU | SCP  | Obs.  | HSC | E[HSC Bud] | <i>P</i> | E[HSC Bif] | <i>P</i> | Ref.     |
|----------------|-----------------------|------|-----|------|-------|-----|------------|----------|------------|----------|----------|
| Synapsid       | Toxodontidae          | 11   | 20  | 1275 | 0.421 |     | 0.470      | 0.729    | 0.467      | 0.737    | 255      |
| Synapsid       | Xenungulata           | 10   | 22  | 128  | 0.582 |     | 0.454      | 0.107    | 0.449      | 0.088    | 256      |
| Synapsid       | Zapodidae             | 10   | 25  | 223  | 0.619 |     | 0.442      | 0.039    | 0.423      | 0.024    | 257      |
| Anapsid        | Ankyramorpha          | 6    | 19  | 2329 | 0.565 |     | 0.487      | 0.164    | 0.442      | 0.053    | 258      |
| Anapsid        | Baenidae              | 9    | 14  | 802  | 0.587 |     | 0.491      | 0.152    | 0.491      | 0.107    | 259      |
| Anapsid        | Basal Testudinata     | 8    | 33  | 3076 | 0.755 |     | 0.380      | <0.001   | 0.349      | <0.001   | 260      |
| Anapsid        | Leptopleuroninae      | 7    | 10  | 455  | 0.542 |     | 0.499      | 0.357    | 0.491      | 0.289    | 261      |
| Anapsid        | Millerettidae         | 6    | 10  | 422  | 0.698 |     | 0.564      | 0.081    | 0.547      | 0.032    | 262      |
| Anapsid        | Nanhsiungchelyidae    | 9    | 10  | 154  | 0.484 |     | 0.542      | 0.652    | 0.469      | 0.459    | 263      |
| Anapsid        | Procolophonoidea      | 7    | 21  | 865  | 0.636 |     | 0.502      | 0.057    | 0.454      | 0.010    | 264      |
| Ichthyosaur    | Ichthyosauria         | 8    | 31  | 3904 | 0.676 |     | 0.425      | 0.001    | 0.411      | <0.001   | 265, 266 |
| Sauropterygian | Mosasauridae          | 9    | 33  | 2183 | 0.484 |     | 0.452      | 0.322    | 0.398      | 0.099    | 267-269  |
| Sauropterygian | Cryptocleidoidea      | 9    | 11  | 1174 | 0.445 |     | 0.508      | 0.729    | 0.503      | 0.744    | 270      |
| Sauropterygian | <i>Nothosaurus</i>    | 7    | 11  | 138  | 0.656 |     | 0.515      | 0.101    | 0.487      | 0.056    | 271      |
| Sauropterygian | Placodontia           | 7    | 10  | 1436 | 0.537 |     | 0.511      | 0.363    | 0.509      | 0.338    | 272      |
| Sauropterygian | Plesiosauridae        | 8    | 11  | 300  | 0.360 |     | 0.477      | 0.863    | 0.481      | 0.876    | 273      |
| Sauropterygian | Plesiosauroidea       | 8    | 32  | 5881 | 0.527 |     | 0.436      | 0.108    | 0.428      | 0.097    | 274      |
| Sauropterygian | Polycotylidae         | 9    | 10  | 433  | 0.582 |     | 0.501      | 0.244    | 0.515      | 0.260    | 275      |
| Sauropterygian | Sphenodontia          | 7    | 22  | 771  | 0.506 |     | 0.501      | 0.482    | 0.478      | 0.319    | 276      |
| Archosaur      | Archosauromorpha      | 7    | 20  | 6293 | 0.442 |     | 0.437      | 0.478    | 0.425      | 0.432    | 277      |
| Archosaur      | Basal Crocodylia      | 7    | 11  | 95   | 0.363 |     | 0.477      | 0.805    | 0.481      | 0.849    | 278      |
| Archosaur      | Basal Crocodyliformes | 9    | 33  | 5966 | 0.437 |     | 0.434      | 0.487    | 0.370      | 0.214    | 279      |
| Archosaur      | Basal Crurotarsia     | 7    | 20  | 4607 | 0.417 |     | 0.501      | 0.893    | 0.464      | 0.772    | 280      |
| Archosaur      | Chroniosuchia         | 6    | 12  | 121  | 0.876 |     | 0.509      | 0.008    | 0.489      | 0.008    | 281      |
| Archosaur      | Crocodylia            | 9    | 48  | 6662 | 0.500 |     | 0.388      | 0.080    | 0.358      | 0.048    | 282, 283 |
| Archosaur      | Diplocynodontinae     | 10   | 35  | 4718 | 0.563 |     | 0.421      | 0.088    | 0.362      | 0.008    | 284      |
| Archosaur      | Dyrosauridae          | 9    | 10  | 153  | 0.529 |     | 0.524      | 0.491    | 0.500      | 0.370    | 285      |
| Archosaur      | Metriorhynchidae      | 8    | 34  | 2335 | 0.407 |     | 0.379      | 0.391    | 0.368      | 0.322    | 286      |
| Archosaur      | Metriorhynchinae      | 8    | 18  | 1138 | 0.454 |     | 0.430      | 0.417    | 0.415      | 0.324    | 287      |
| Archosaur      | Phytosauridae         | 7    | 10  | 1045 | 0.688 |     | 0.532      | 0.029    | 0.497      | 0.010    | 288      |
| Archosaur      | Phytosauroidea        | 7    | 18  | 240  | 0.558 |     | 0.512      | 0.297    | 0.433      | 0.023    | 289, 290 |
| Archosaur      | Protosuchidae         | 8    | 14  | 5979 | 0.472 |     | 0.526      | 0.730    | 0.489      | 0.579    | 291      |
| Archosaur      | Sebecosuchia          | 10   | 16  | 295  | 0.235 |     | 0.419      | 0.981    | 0.399      | 0.978    | 292, 293 |



| Higher Taxon | Analyzed Taxon      | Per. | OTU | SCP   | Obs.  | HSC   | E[HSC Bud] | <i>P</i> | E[HSC Bif] | <i>P</i> | Ref. |
|--------------|---------------------|------|-----|-------|-------|-------|------------|----------|------------|----------|------|
| Archosaur    | Thalattosauriformes | 7    | 12  | 87    | 0.454 | 0.528 | 0.778      | 0.496    | 0.691      | 294      |      |
| Archosaur    | Basal Pterosauria   | 8    | 18  | 1878  | 0.660 | 0.480 | 0.026      | 0.429    | 0.004      | 295      |      |
| Archosaur    | Pterosauria         | 8    | 56  | 6076  | 0.449 | 0.342 | 0.109      | 0.337    | 0.095      | 296      |      |
| Archosaur    | Allosauroidae       | 8    | 12  | 367   | 0.733 | 0.527 | 0.010      | 0.511    | 0.004      | 297      |      |
| Archosaur    | Ankylosauria        | 9    | 45  | 3872  | 0.544 | 0.462 | 0.111      | 0.459    | 0.088      | 298      |      |
| Archosaur    | Ankylosauroidae     | 9    | 16  | 741   | 0.549 | 0.513 | 0.245      | 0.520    | 0.279      | 299      |      |
| Archosaur    | Basal Iguanodontia  | 8    | 21  | 272   | 0.759 | 0.532 | 0.008      | 0.504    | 0.001      | 300      |      |
| Archosaur    | Carcharodontosauria | 9    | 14  | 384   | 0.613 | 0.487 | 0.147      | 0.479    | 0.118      | 301      |      |
| Archosaur    | Ceratopsidae        | 9    | 13  | 109   | 0.569 | 0.575 | 0.514      | 0.487    | 0.273      | 302      |      |
| Archosaur    | Ceratosauria        | 9    | 18  | 1441  | 0.644 | 0.520 | 0.187      | 0.488    | 0.053      | 303      |      |
| Archosaur    | Chasmosaurinae      | 9    | 18  | 1491  | 0.547 | 0.451 | 0.168      | 0.443    | 0.100      | 304      |      |
| Archosaur    | Deinonychosauria    | 9    | 17  | 1391  | 0.471 | 0.499 | 0.625      | 0.489    | 0.586      | 305-307  |      |
| Archosaur    | Diplodocoidea       | 8    | 20  | 3632  | 0.421 | 0.433 | 0.548      | 0.432    | 0.535      | 308      |      |
| Archosaur    | Dromaeosauridae     | 9    | 17  | 2385  | 0.401 | 0.455 | 0.745      | 0.453    | 0.760      | 309      |      |
| Archosaur    | Euornithopoda       | 8    | 10  | 121   | 0.488 | 0.529 | 0.698      | 0.526    | 0.692      | 310      |      |
| Archosaur    | Hadrosaurinae       | 9    | 10  | 2031  | 0.482 | 0.492 | 0.530      | 0.493    | 0.541      | 311      |      |
| Archosaur    | Hadrosauroidae      | 9    | 29  | 5866  | 0.769 | 0.456 | 0.001      | 0.369    | <0.001     | 312      |      |
| Archosaur    | Megalosauroidae     | 8    | 19  | 2757  | 0.474 | 0.521 | 0.677      | 0.480    | 0.531      | 301      |      |
| Archosaur    | Neoceratopsia       | 9    | 18  | 4413  | 0.537 | 0.446 | 0.201      | 0.456    | 0.175      | 313, 314 |      |
| Archosaur    | Ornithopoda         | 9    | 14  | 1203  | 0.379 | 0.462 | 0.859      | 0.469    | 0.904      | 315      |      |
| Archosaur    | Oviraptorosauria    | 9    | 13  | 249   | 0.512 | 0.470 | 0.356      | 0.467    | 0.340      | 306, 316 |      |
| Archosaur    | Prosauropoda        | 7    | 15  | 2786  | 0.549 | 0.452 | 0.176      | 0.456    | 0.168      | 317      |      |
| Archosaur    | Saurolophidae       | 9    | 28  | 18063 | 0.472 | 0.468 | 0.482      | 0.411    | 0.183      | 318      |      |
| Archosaur    | Sauropoda           | 8    | 28  | 28844 | 0.471 | 0.467 | 0.483      | 0.425    | 0.276      | 319      |      |
| Archosaur    | Titanosauriformes   | 9    | 21  | 1258  | 0.579 | 0.458 | 0.124      | 0.445    | 0.101      | 320      |      |
| Archosaur    | Tyransauroidae      | 9    | 19  | 25404 | 0.858 | 0.499 | <0.001     | 0.443    | <0.001     | 321      |      |

**Table S6. Differences between Observations and Expectations for Parameters Hypothesized to Elevate Hierarchical Stratigraphic Compatibility.**

| Analyzed Taxon      | Cum. Disp. $\frac{S}{2}$ |       | Clade CG |       | Paracl. CG |       | Pair Anag. |       | Paracl. Dur. |       | "Living Fossils" |       |
|---------------------|--------------------------|-------|----------|-------|------------|-------|------------|-------|--------------|-------|------------------|-------|
|                     | Obs.                     | Exp.  | Obs.     | Exp.  | Obs.       | Exp.  | Obs.       | Exp.  | Obs.         | Exp.  | Obs.             | Exp.  |
| Anopliidae          | 0.962                    | 0.890 | 0.436    | 0.444 | 0.677      | 0.619 | 0.069      | 0.134 | 0.696        | 0.672 | 0.554            | 0.315 |
| Atrypidae           | 0.993                    | 0.854 | 0.437    | 0.447 | 0.324      | 0.292 | 0.223      | 0.351 | 0.318        | 0.275 | 0.160            | 0.129 |
| Billingsellida      | 0.867                    | 0.847 | 0.368    | 0.452 | 0.406      | 0.496 | 0.190      | 0.247 | 0.446        | 0.508 | 0.338            | 0.237 |
| Echinoconchidae     | 0.887                    | 0.858 | 0.394    | 0.461 | 0.590      | 0.605 | 0.320      | 0.220 | 0.695        | 0.652 | 0.375            | 0.291 |
| <i>Floweria</i>     | 1.051                    | 0.872 | 0.476    | 0.444 | 0.653      | 0.645 | 0.269      | 0.324 | 0.732        | 0.701 | 0.611            | 0.431 |
| <i>Kutchithyris</i> | 0.927                    | 0.861 | 0.409    | 0.456 | 0.415      | 0.563 | 0.289      | 0.310 | 0.461        | 0.595 | 0.198            | 0.296 |
| Leptenellidae       | 0.965                    | 0.875 | 0.529    | 0.439 | 0.557      | 0.496 | 0.106      | 0.173 | 0.540        | 0.521 | 0.300            | 0.261 |
| Leptestiidae        | 0.885                    | 0.903 | 0.375    | 0.472 | 0.477      | 0.436 | 0.486      | 0.492 | 0.531        | 0.421 | 0.447            | 0.172 |
| Linguloidea         | 0.949                    | 0.832 | 0.552    | 0.435 | 0.538      | 0.471 | 0.216      | 0.225 | 0.524        | 0.495 | 0.177            | 0.246 |
| Orbirhynchia        | 0.825                    | 0.818 | 0.511    | 0.442 | 0.451      | 0.502 | 0.853      | 0.317 | 0.355        | 0.532 | 0.040            | 0.286 |
| Parastrophinidae    | 1.051                    | 0.846 | 0.534    | 0.474 | 0.395      | 0.388 | 0.124      | 0.265 | 0.361        | 0.384 | 0.117            | 0.167 |
| <i>Plaesiomys</i>   | 1.023                    | 0.929 | 0.469    | 0.464 | 0.999      | 0.786 | <0.001     | 0.125 | 0.994        | 0.888 | 0.974            | 0.423 |
| <i>Schizophoria</i> | 1.000                    | 0.867 | 0.460    | 0.442 | 0.772      | 0.696 | 0.052      | 0.146 | 0.826        | 0.756 | 0.591            | 0.443 |
| Strophomenoidea     | 1.054                    | 0.913 | 0.396    | 0.459 | 0.505      | 0.503 | 0.074      | 0.214 | 0.556        | 0.521 | 0.556            | 0.235 |
| Terebratuloidea     | 0.955                    | 0.829 | 0.435    | 0.432 | 0.695      | 0.513 | 0.056      | 0.083 | 0.699        | 0.560 | 0.533            | 0.239 |
| Tritoechiidae       | 0.830                    | 0.855 | 0.643    | 0.465 | 0.352      | 0.370 | 0.385      | 0.514 | 0.350        | 0.354 | 0.162            | 0.145 |
| Virgianidae         | 0.974                    | 0.859 | 0.554    | 0.458 | 0.443      | 0.389 | 0.205      | 0.445 | 0.442        | 0.373 | 0.286            | 0.164 |
| Conocardioidea      | 0.861                    | 0.812 | 0.488    | 0.459 | 0.437      | 0.510 | 0.191      | 0.148 | 0.425        | 0.527 | 0.263            | 0.238 |
| Eopteriidae         | 0.943                    | 0.842 | 0.576    | 0.478 | 0.475      | 0.551 | 0.304      | 0.293 | 0.445        | 0.529 | 0.137            | 0.219 |
| Pseudobigaleaidae   | 0.881                    | 0.818 | 0.427    | 0.439 | 0.445      | 0.461 | 0.513      | 0.355 | 0.429        | 0.469 | 0.283            | 0.240 |
| Ribeiriidae         | 0.985                    | 0.853 | 0.545    | 0.451 | 0.329      | 0.427 | 0.316      | 0.251 | 0.321        | 0.446 | 0.202            | 0.212 |
| Technophoridae      | 1.021                    | 0.818 | 0.536    | 0.466 | 0.410      | 0.475 | 0.258      | 0.414 | 0.430        | 0.453 | 0.197            | 0.195 |
| Caprinoidea         | 0.617                    | 0.771 | 0.347    | 0.462 | 0.428      | 0.530 | 0.178      | 0.282 | 0.526        | 0.558 | 0.069            | 0.250 |
| Cardiidae           | 0.981                    | 0.825 | 0.352    | 0.426 | 0.579      | 0.447 | 0.008      | 0.161 | 0.623        | 0.466 | 0.623            | 0.215 |
| <i>Chione</i>       | 1.188                    | 0.866 | 0.373    | 0.440 | 0.559      | 0.603 | 0.051      | 0.153 | 0.628        | 0.662 | 0.628            | 0.324 |

“Disp.  $\frac{S}{2}$ ” = cumulative clade disparity after half of taxa have evolved. “Clade CG” gives center of gravity for the whole clade.

“Paracl. CG” gives the CG for paraclades diagnosed with states **00** from HSC pairs. “Pair Anag.” Gives state-pairs in which the older state-pair disappears at the same time the derived pair appears from HSC pairs. “Paracl.” Duration gives duration of paraclades diagnosed by **00** from HSC character-pairs. Duration is as a proportion of the entire clade. “Living fossils” gives the proportion of paraclades diagnosed by **00** that are still extant at the end of a study.

| Analyzed Taxon        | Cum. Disp. $\frac{S}{2}$ |       | Clade CG |       | Paracl. CG |       | Pair Anag. |       | Paracl. Dur. |       | "Living Fossils" |       |
|-----------------------|--------------------------|-------|----------|-------|------------|-------|------------|-------|--------------|-------|------------------|-------|
|                       | Obs.                     | Exp.  | Obs.     | Exp.  | Obs.       | Exp.  | Obs.       | Exp.  | Obs.         | Exp.  | Obs.             | Exp.  |
| <i>Chionopsis</i>     | 1.153                    | 0.842 | 0.407    | 0.439 | 0.764      | 0.539 | 0.007      | 0.195 | 0.870        | 0.572 | 0.840            | 0.293 |
| Corbulidae            | 0.896                    | 0.867 | 0.344    | 0.451 | 0.547      | 0.434 | 0.179      | 0.419 | 0.588        | 0.434 | 0.587            | 0.196 |
| Eucardiidae           | 0.909                    | 0.879 | 0.406    | 0.448 | 0.237      | 0.364 | 0.204      | 0.317 | 0.248        | 0.368 | 0.162            | 0.160 |
| Hippuritoidea         | 0.821                    | 0.780 | 0.350    | 0.417 | 0.497      | 0.674 | 0.117      | 0.104 | 0.614        | 0.761 | 0.249            | 0.392 |
| <i>Leptodesma</i>     | 0.899                    | 0.857 | 0.712    | 0.439 | 0.803      | 0.705 | 0.044      | 0.165 | 1.000        | 0.776 | 1.000            | 0.500 |
| Megadesmidae          | 0.972                    | 0.802 | 0.384    | 0.444 | 0.607      | 0.568 | <0.001     | 0.338 | 0.707        | 0.603 | 0.707            | 0.337 |
| Ostreaoidea           | 0.821                    | 0.779 | 0.434    | 0.417 | 0.792      | 0.605 | 0.077      | 0.134 | 0.758        | 0.661 | 0.711            | 0.350 |
| Pholadidae            | 1.057                    | 0.775 | 0.388    | 0.461 | 0.651      | 0.606 | <0.001     | 0.219 | 0.726        | 0.645 | 0.656            | 0.274 |
| Acanthoceratidae      | 1.029                    | 0.907 | 0.394    | 0.435 | 0.239      | 0.252 | 0.147      | 0.362 | 0.259        | 0.228 | 0.222            | 0.109 |
| Ceratitida            | 0.896                    | 0.835 | 0.392    | 0.420 | 0.671      | 0.587 | 0.060      | 0.122 | 0.743        | 0.627 | 0.574            | 0.321 |
| Goniatitoidea         | 0.654                    | 0.761 | 0.410    | 0.450 | 0.671      | 0.666 | 0.274      | 0.287 | 0.787        | 0.729 | 0.075            | 0.336 |
| Hamitidae             | 0.691                    | 0.769 | 0.353    | 0.439 | 0.461      | 0.493 | 0.123      | 0.256 | 0.521        | 0.509 | 0.286            | 0.261 |
| Hammatoceratinae      | 0.992                    | 0.910 | 0.335    | 0.451 | 0.660      | 0.633 | 0.036      | 0.200 | 0.729        | 0.688 | 0.714            | 0.333 |
| Hildoceratidae        | 0.828                    | 0.887 | 0.497    | 0.451 | 0.492      | 0.577 | 0.275      | 0.160 | 0.532        | 0.613 | 0.286            | 0.300 |
| Scaphitacoidea        | 0.869                    | 0.786 | 0.376    | 0.455 | 0.417      | 0.547 | 0.228      | 0.333 | 0.525        | 0.578 | 0.525            | 0.270 |
| <i>Semiformiceras</i> | 0.791                    | 0.865 | 0.532    | 0.452 | 0.254      | 0.398 | 0.726      | 0.522 | 0.214        | 0.393 | 0.023            | 0.167 |
| Turrilitoidea         | 0.929                    | 0.771 | 0.342    | 0.441 | 0.698      | 0.641 | 0.047      | 0.179 | 0.833        | 0.699 | 0.805            | 0.355 |
| Cyrtonelloidea        | 1.081                    | 0.819 | 0.397    | 0.471 | 0.397      | 0.461 | 0.406      | 0.386 | 0.356        | 0.415 | 0.197            | 0.186 |
| Ancillinae            | 0.974                    | 0.790 | 0.450    | 0.425 | 0.885      | 0.743 | 0.038      | 0.081 | 0.893        | 0.856 | 0.599            | 0.443 |
| Bucaniidae            | 0.967                    | 0.824 | 0.571    | 0.462 | 0.403      | 0.425 | 0.164      | 0.223 | 0.401        | 0.435 | 0.290            | 0.189 |
| Columbellidae         | 0.946                    | 0.841 | 0.384    | 0.466 | 0.693      | 0.512 | 0.458      | 0.277 | 0.742        | 0.528 | 0.740            | 0.217 |
| Eotomarioidea         | 0.904                    | 0.812 | 0.373    | 0.444 | 0.490      | 0.414 | 0.064      | 0.200 | 0.518        | 0.429 | 0.454            | 0.201 |
| Harpidae              | 0.836                    | 0.800 | 0.424    | 0.465 | 0.507      | 0.444 | 0.247      | 0.387 | 0.600        | 0.433 | 0.318            | 0.188 |
| Hormotomidae          | 0.950                    | 0.809 | 0.455    | 0.442 | 0.450      | 0.445 | 0.186      | 0.214 | 0.460        | 0.468 | 0.376            | 0.227 |
| Macluritidae          | 0.939                    | 0.837 | 0.462    | 0.460 | 0.358      | 0.460 | 0.310      | 0.301 | 0.356        | 0.467 | 0.165            | 0.219 |
| Muricidae             | 0.749                    | 0.820 | 0.350    | 0.439 | 0.445      | 0.530 | 0.129      | 0.236 | 0.519        | 0.562 | 0.458            | 0.287 |
| Nassariidae           | 0.959                    | 0.835 | 0.319    | 0.446 | 0.482      | 0.579 | 0.186      | 0.160 | 0.551        | 0.611 | 0.418            | 0.292 |
| Rapaninae             | 0.992                    | 0.868 | 0.336    | 0.430 | 0.740      | 0.624 | <0.001     | 0.110 | 0.780        | 0.681 | 0.780            | 0.324 |
| Sinuitidae            | 0.773                    | 0.839 | 0.472    | 0.464 | 0.675      | 0.477 | 0.287      | 0.353 | 0.736        | 0.485 | 0.606            | 0.219 |
| Subulitoidea          | 0.950                    | 0.843 | 0.387    | 0.449 | 0.725      | 0.547 | 0.034      | 0.272 | 0.753        | 0.489 | 0.706            | 0.245 |
| Trochonematoidea      | 0.927                    | 0.804 | 0.357    | 0.458 | 0.743      | 0.536 | 0.109      | 0.070 | 0.782        | 0.588 | 0.782            | 0.240 |
| Tropidodiscidae       | 1.019                    | 0.821 | 0.391    | 0.469 | 0.342      | 0.422 | 0.440      | 0.347 | 0.369        | 0.409 | 0.179            | 0.180 |

| Analyzed Taxon             | Cum. Disp. $\frac{S}{2}$ |       | Clade CG |       | Paracl. CG |       | Pair Anag. |       | Paracl. Dur. |       | "Living Fossils" |       |
|----------------------------|--------------------------|-------|----------|-------|------------|-------|------------|-------|--------------|-------|------------------|-------|
|                            | Obs.                     | Exp.  | Obs.     | Exp.  | Obs.       | Exp.  | Obs.       | Exp.  | Obs.         | Exp.  | Obs.             | Exp.  |
| Agnostoidea                | 0.980                    | 0.771 | 0.661    | 0.478 | 0.688      | 0.551 | 0.034      | 0.067 | 0.667        | 0.625 | 0.606            | 0.227 |
| Agnostoidea                | 0.986                    | 0.831 | 0.426    | 0.460 | 0.567      | 0.516 | 0.102      | 0.104 | 0.563        | 0.551 | 0.373            | 0.232 |
| Alokistocaridae            | 1.020                    | 0.886 | 0.467    | 0.464 | 0.363      | 0.386 | 0.365      | 0.382 | 0.368        | 0.372 | 0.205            | 0.164 |
| Basal Trilobita            | 0.894                    | 0.868 | 0.402    | 0.446 | 0.796      | 0.565 | 0.293      | 0.376 | 0.797        | 0.598 | 0.741            | 0.325 |
| Burlingiidae               | 0.658                    | 0.868 | 0.436    | 0.442 | 0.515      | 0.735 | 0.389      | 0.227 | 0.564        | 0.797 | 0.029            | 0.412 |
| Emuellidae                 | 0.674                    | 0.832 | 0.541    | 0.471 | 0.733      | 0.634 | 0.122      | 0.289 | 0.751        | 0.671 | 0.338            | 0.286 |
| Euptychaspidinae           | 0.976                    | 0.803 | 0.478    | 0.473 | 0.828      | 0.487 | 0.283      | 0.503 | 0.757        | 0.477 | 0.329            | 0.188 |
| Iwayaspidinae              | 0.920                    | 0.887 | 0.356    | 0.453 | 0.805      | 0.616 | 0.017      | 0.226 | 0.879        | 0.656 | 0.879            | 0.327 |
| Kochaspidae                | 0.960                    | 0.826 | 0.563    | 0.447 | 0.449      | 0.412 | 0.240      | 0.261 | 0.429        | 0.390 | 0.291            | 0.184 |
| Missisquoiidae             | 0.880                    | 0.896 | 0.462    | 0.437 | 0.647      | 0.579 | 0.262      | 0.252 | 0.632        | 0.570 | 0.304            | 0.302 |
| Nevadoidea                 | 0.981                    | 0.887 | 0.642    | 0.487 | 0.615      | 0.548 | 0.211      | 0.282 | 0.577        | 0.558 | 0.332            | 0.225 |
| Olenelloidea               | 0.982                    | 0.893 | 0.404    | 0.436 | 0.514      | 0.505 | 0.206      | 0.212 | 0.550        | 0.520 | 0.251            | 0.276 |
| Oryctocephalidae           | 1.043                    | 0.863 | 0.506    | 0.482 | 0.225      | 0.370 | 0.287      | 0.365 | 0.240        | 0.350 | 0.079            | 0.146 |
| Oryctocephalinae           | 1.056                    | 0.843 | 0.420    | 0.441 | 0.413      | 0.398 | 0.356      | 0.398 | 0.428        | 0.403 | 0.357            | 0.207 |
| Polymeroidea               | 0.719                    | 0.793 | 0.458    | 0.439 | 0.766      | 0.472 | 0.112      | 0.286 | 0.840        | 0.479 | 0.814            | 0.245 |
| Pterocephaliidae           | 0.861                    | 0.825 | 0.435    | 0.435 | 0.599      | 0.518 | 0.113      | 0.132 | 0.604        | 0.554 | 0.560            | 0.259 |
| Ptychoparioidea            | 0.912                    | 0.785 | 0.417    | 0.466 | 0.534      | 0.467 | 0.299      | 0.247 | 0.621        | 0.475 | 0.545            | 0.189 |
| Wuaniidae                  | 0.931                    | 0.879 | 0.392    | 0.441 | 0.490      | 0.495 | <0.001     | 0.062 | 0.600        | 0.533 | 0.333            | 0.250 |
| Acanthoparyphinae          | 0.692                    | 0.781 | 0.515    | 0.438 | 0.448      | 0.572 | 0.330      | 0.241 | 0.496        | 0.596 | 0.255            | 0.309 |
| <i>Ceratocara</i>          | 1.022                    | 0.879 | 0.333    | 0.449 | 0.785      | 0.694 | 0.230      | 0.371 | 0.884        | 0.753 | 0.837            | 0.394 |
| Deiphoninae                | 0.787                    | 0.874 | 0.518    | 0.438 | 0.687      | 0.710 | 0.230      | 0.160 | 0.747        | 0.790 | 0.208            | 0.436 |
| Dimeropygidae              | 0.836                    | 0.797 | 0.583    | 0.448 | 0.478      | 0.500 | 0.592      | 0.364 | 0.451        | 0.517 | 0.191            | 0.235 |
| Illaenidae                 | 1.053                    | 0.835 | 0.505    | 0.461 | 0.443      | 0.370 | 0.131      | 0.292 | 0.465        | 0.361 | 0.315            | 0.154 |
| <i>Ovalocephalus</i>       | 0.950                    | 0.788 | 0.442    | 0.443 | 0.257      | 0.429 | 0.857      | 0.545 | 0.251        | 0.432 | <0.001           | 0.197 |
| <i>Pseudopetigurus</i>     | 0.911                    | 0.862 | 0.579    | 0.471 | 0.377      | 0.468 | 0.242      | 0.374 | 0.375        | 0.465 | 0.150            | 0.202 |
| <i>Pseudosphaerexochus</i> | 0.948                    | 0.785 | 0.442    | 0.450 | 0.685      | 0.680 | 0.362      | 0.382 | 0.790        | 0.747 | 0.692            | 0.412 |
| Reedocalymeninae           | 0.831                    | 0.837 | 0.418    | 0.442 | 0.635      | 0.597 | 0.125      | 0.086 | 0.663        | 0.671 | 0.557            | 0.320 |
| Shumardiidae               | 0.867                    | 0.858 | 0.511    | 0.442 | 0.535      | 0.457 | 0.432      | 0.326 | 0.499        | 0.432 | 0.302            | 0.228 |
| Sphaerexochinae            | 0.902                    | 0.836 | 0.516    | 0.441 | 0.359      | 0.641 | 0.457      | 0.178 | 0.350        | 0.640 | 0.081            | 0.270 |
| <i>Stenoblepharum</i>      | 0.936                    | 0.843 | 0.449    | 0.469 | 0.381      | 0.489 | 0.386      | 0.456 | 0.454        | 0.485 | 0.234            | 0.206 |
| Tetralichinae              | 0.878                    | 0.852 | 0.500    | 0.448 | 0.540      | 0.575 | 0.470      | 0.491 | 0.496        | 0.598 | 0.164            | 0.308 |
| Toernquistiidae            | 0.851                    | 0.820 | 0.461    | 0.439 | 0.686      | 0.532 | 0.166      | 0.147 | 0.692        | 0.558 | 0.547            | 0.270 |

| Analyzed Taxon         | Cum. Disp. $\frac{S}{2}$ |       | Clade CG |       | Paracl. CG |       | Pair Anag. |       | Paracl. Dur. |       | "Living Fossils" |       |
|------------------------|--------------------------|-------|----------|-------|------------|-------|------------|-------|--------------|-------|------------------|-------|
|                        | Obs.                     | Exp.  | Obs.     | Exp.  | Obs.       | Exp.  | Obs.       | Exp.  | Obs.         | Exp.  | Obs.             | Exp.  |
| <i>Acanthopgye</i>     | 0.954                    | 0.891 | 0.315    | 0.468 | 0.395      | 0.536 | 0.172      | 0.229 | 0.433        | 0.522 | 0.222            | 0.217 |
| <i>Edgecombeaspis</i>  | 0.748                    | 0.793 | 0.491    | 0.472 | 0.384      | 0.548 | 0.635      | 0.532 | 0.378        | 0.553 | <0.001           | 0.213 |
| Encrinurinae           | 0.997                    | 0.783 | 0.381    | 0.438 | 0.713      | 0.515 | 0.196      | 0.240 | 0.776        | 0.545 | 0.738            | 0.263 |
| Odontopleuridae        | 0.954                    | 0.808 | 0.479    | 0.435 | 0.606      | 0.490 | 0.143      | 0.179 | 0.562        | 0.513 | 0.269            | 0.241 |
| Phacopidae             | 0.826                    | 0.854 | 0.544    | 0.467 | 0.271      | 0.303 | 0.520      | 0.251 | 0.236        | 0.288 | 0.064            | 0.123 |
| Trochurinae            | 0.815                    | 0.858 | 0.462    | 0.443 | 0.430      | 0.457 | 0.373      | 0.302 | 0.428        | 0.470 | 0.286            | 0.266 |
| Asteropyginae          | 0.988                    | 0.855 | 0.422    | 0.455 | 0.588      | 0.549 | 0.107      | 0.128 | 0.614        | 0.588 | 0.448            | 0.260 |
| <i>Basidechenella</i>  | 1.144                    | 0.802 | 0.550    | 0.448 | 0.515      | 0.613 | 0.338      | 0.386 | 0.585        | 0.599 | 0.279            | 0.303 |
| Calmoniidae            | 0.993                    | 0.878 | 0.397    | 0.463 | 0.570      | 0.586 | 0.343      | 0.330 | 0.598        | 0.608 | 0.276            | 0.246 |
| Calmoniidae            | 0.937                    | 0.832 | 0.278    | 0.480 | 0.554      | 0.575 | 0.489      | 0.297 | 0.665        | 0.582 | 0.519            | 0.237 |
| <i>Dechenella</i>      | 1.043                    | 0.871 | 0.325    | 0.466 | 0.524      | 0.530 | 0.149      | 0.291 | 0.622        | 0.540 | 0.275            | 0.243 |
| Koneprusiinae          | 0.921                    | 0.833 | 0.409    | 0.435 | 0.701      | 0.570 | 0.513      | 0.288 | 0.676        | 0.567 | 0.460            | 0.278 |
| Proetidae              | 0.866                    | 0.843 | 0.432    | 0.441 | 0.752      | 0.711 | 0.037      | 0.130 | 0.833        | 0.769 | 0.559            | 0.394 |
| <i>Trimerocephalus</i> | 1.347                    | 0.759 | 0.324    | 0.444 | 0.420      | 0.488 | 0.416      | 0.525 | 0.472        | 0.503 | 0.310            | 0.238 |
| <i>Kaskia</i>          | 0.877                    | 0.878 | 0.459    | 0.463 | 0.792      | 0.655 | 0.252      | 0.144 | 0.686        | 0.710 | 0.492            | 0.322 |
| Phillipsidae           | 1.036                    | 0.853 | 0.561    | 0.457 | 0.647      | 0.645 | 0.170      | 0.097 | 0.566        | 0.715 | 0.200            | 0.303 |
| Lichoidea              | 0.995                    | 0.856 | 0.480    | 0.428 | 0.293      | 0.508 | 0.236      | 0.197 | 0.281        | 0.489 | 0.057            | 0.231 |
| Adelophthalmoidea      | 0.816                    | 0.785 | 0.534    | 0.470 | 0.540      | 0.612 | 0.626      | 0.583 | 0.554        | 0.523 | 0.032            | 0.177 |
| Cambrian Arachnomorpha | 0.879                    | 0.785 | 0.433    | 0.461 | 0.513      | 0.502 | 0.121      | 0.336 | 0.603        | 0.500 | 0.448            | 0.215 |
| Eurypetriidae          | 0.947                    | 0.842 | 0.456    | 0.478 | 0.466      | 0.371 | 0.368      | 0.481 | 0.443        | 0.337 | 0.251            | 0.132 |
| <i>Eurypterus</i>      | 1.021                    | 0.808 | 0.420    | 0.463 | 0.607      | 0.392 | 0.438      | 0.707 | 0.588        | 0.366 | 0.324            | 0.079 |
| Stylonurina            | 0.887                    | 0.782 | 0.622    | 0.451 | 0.659      | 0.664 | 0.167      | 0.312 | 0.613        | 0.665 | 0.344            | 0.289 |
| Astacidae              | 0.841                    | 0.883 | 0.457    | 0.461 | 0.394      | 0.489 | 0.473      | 0.325 | 0.372        | 0.503 | 0.034            | 0.233 |
| Astacidae              | 0.831                    | 0.839 | 0.350    | 0.435 | 0.305      | 0.432 | 0.093      | 0.263 | 0.339        | 0.435 | 0.241            | 0.217 |
| Beyrichiocopa          | 0.902                    | 0.769 | 0.319    | 0.441 | 0.780      | 0.597 | 0.164      | 0.225 | 0.806        | 0.603 | 0.782            | 0.275 |
| Phyllocarida           | 0.872                    | 0.787 | 0.207    | 0.438 | 0.654      | 0.484 | 0.489      | 0.236 | 0.688        | 0.497 | 0.655            | 0.246 |
| Thylacocephala         | 0.802                    | 0.881 | 0.528    | 0.442 | 0.225      | 0.328 | 0.693      | 0.463 | 0.231        | 0.325 | 0.155            | 0.177 |
| Xanthoidea             | 1.075                    | 0.762 | 0.338    | 0.441 | 0.906      | 0.687 | <0.001     | 0.249 | 0.967        | 0.758 | 0.967            | 0.411 |
| Anomalocystitidae      | 0.993                    | 0.826 | 0.444    | 0.441 | 0.617      | 0.724 | 0.229      | 0.184 | 0.709        | 0.803 | 0.387            | 0.449 |
| Chauvelicystinae       | 1.151                    | 0.858 | 0.429    | 0.452 | 0.571      | 0.463 | 0.274      | 0.466 | 0.576        | 0.483 | 0.205            | 0.242 |
| Cincta                 | 0.883                    | 0.772 | 0.405    | 0.443 | 0.425      | 0.488 | 0.242      | 0.382 | 0.467        | 0.508 | 0.232            | 0.248 |
| Cornuta                | 0.941                    | 0.766 | 0.549    | 0.439 | 0.732      | 0.644 | 0.143      | 0.206 | 0.694        | 0.711 | 0.357            | 0.366 |

| Analyzed Taxon        | Cum. Disp. $\frac{S}{2}$ |       | Clade CG |       | Paracl. CG |       | Pair Anag. |       | Paracl. Dur. |       | "Living Fossils" |       |
|-----------------------|--------------------------|-------|----------|-------|------------|-------|------------|-------|--------------|-------|------------------|-------|
|                       | Obs.                     | Exp.  | Obs.     | Exp.  | Obs.       | Exp.  | Obs.       | Exp.  | Obs.         | Exp.  | Obs.             | Exp.  |
| Cornuta               | 0.968                    | 0.763 | 0.474    | 0.444 | 0.650      | 0.698 | 0.207      | 0.230 | 0.704        | 0.767 | 0.467            | 0.412 |
| Cornuta               | 0.876                    | 0.818 | 0.587    | 0.440 | 0.469      | 0.375 | 0.144      | 0.323 | 0.484        | 0.378 | 0.320            | 0.200 |
| Dendrocystitidae      | 0.915                    | 0.864 | 0.424    | 0.443 | 0.385      | 0.490 | 0.350      | 0.371 | 0.437        | 0.510 | 0.154            | 0.275 |
| Mitrata               | 0.841                    | 0.742 | 0.457    | 0.469 | 0.296      | 0.535 | 0.624      | 0.459 | 0.290        | 0.544 | 0.005            | 0.212 |
| Mitrata               | 0.927                    | 0.800 | 0.583    | 0.435 | 0.395      | 0.413 | 0.434      | 0.410 | 0.380        | 0.404 | 0.113            | 0.206 |
| Stylophora            | 0.889                    | 0.784 | 0.590    | 0.479 | 0.261      | 0.318 | 0.305      | 0.317 | 0.213        | 0.304 | 0.053            | 0.127 |
| Agelacrinitinae       | 0.727                    | 0.904 | 0.394    | 0.458 | 0.547      | 0.556 | 0.383      | 0.357 | 0.628        | 0.556 | 0.567            | 0.250 |
| Edrioasteroidea       | 0.640                    | 0.808 | 0.477    | 0.483 | 0.573      | 0.578 | 0.233      | 0.349 | 0.632        | 0.576 | 0.374            | 0.191 |
| Isorophida            | 1.197                    | 0.812 | 0.540    | 0.465 | 0.874      | 0.666 | 0.170      | 0.333 | 0.800        | 0.683 | 0.429            | 0.289 |
| Asterozoa             | 1.017                    | 0.751 | 0.494    | 0.462 | 0.751      | 0.607 | 0.136      | 0.232 | 0.785        | 0.631 | 0.577            | 0.264 |
| Goniasteridae         | 0.851                    | 0.831 | 0.490    | 0.443 | 0.693      | 0.661 | 0.189      | 0.272 | 0.696        | 0.729 | 0.403            | 0.391 |
| Blastoidea            | 0.910                    | 0.798 | 0.482    | 0.428 | 0.572      | 0.518 | 0.125      | 0.174 | 0.492        | 0.531 | 0.300            | 0.241 |
| Glyptocystitidae      | 0.875                    | 0.852 | 0.483    | 0.443 | 0.309      | 0.615 | 0.500      | 0.429 | 0.317        | 0.622 | 0.025            | 0.346 |
| Pleurocystitidae      | 1.055                    | 0.835 | 0.491    | 0.468 | 0.418      | 0.612 | 0.585      | 0.370 | 0.406        | 0.598 | 0.049            | 0.212 |
| Basal Crinoidea       | 1.013                    | 0.892 | 0.425    | 0.433 | 0.387      | 0.312 | 0.111      | 0.282 | 0.392        | 0.308 | 0.184            | 0.143 |
| Botryocrinidae        | 0.838                    | 0.849 | 0.514    | 0.450 | 0.497      | 0.524 | 0.215      | 0.328 | 0.499        | 0.530 | 0.188            | 0.245 |
| Calceocrinidae        | 1.027                    | 0.882 | 0.597    | 0.432 | 0.310      | 0.442 | 0.069      | 0.234 | 0.298        | 0.458 | 0.048            | 0.222 |
| Camerata              | 1.028                    | 0.876 | 0.302    | 0.429 | 0.396      | 0.357 | 0.231      | 0.285 | 0.449        | 0.360 | 0.338            | 0.181 |
| Cladida               | 1.060                    | 0.826 | 0.326    | 0.426 | 0.558      | 0.375 | 0.080      | 0.278 | 0.603        | 0.372 | 0.581            | 0.184 |
| Cupulocrinidae        | 1.002                    | 0.804 | 0.411    | 0.446 | 0.440      | 0.402 | 0.318      | 0.575 | 0.524        | 0.409 | 0.458            | 0.205 |
| <i>Cyathocrinites</i> | 0.787                    | 0.818 | 0.548    | 0.439 | 0.714      | 0.610 | 0.136      | 0.378 | 0.727        | 0.657 | 0.727            | 0.393 |
| Disparida             | 0.965                    | 0.849 | 0.420    | 0.428 | 0.406      | 0.358 | 0.081      | 0.217 | 0.436        | 0.367 | 0.410            | 0.179 |
| Mespilocrinus         | 0.959                    | 0.781 | 0.452    | 0.444 | 0.745      | 0.582 | 0.122      | 0.514 | 0.761        | 0.616 | 0.364            | 0.286 |
| Pereichocrinidae      | 1.035                    | 0.877 | 0.503    | 0.439 | 0.633      | 0.635 | 0.129      | 0.205 | 0.616        | 0.662 | 0.425            | 0.321 |
| Arbacoidea            | 0.706                    | 0.799 | 0.553    | 0.441 | 0.466      | 0.602 | 0.056      | 0.160 | 0.465        | 0.658 | 0.033            | 0.289 |
| Arbacoidea            | 1.052                    | 0.838 | 0.398    | 0.483 | 0.548      | 0.454 | 0.203      | 0.272 | 0.579        | 0.464 | 0.381            | 0.180 |
| Cassiduloidea         | 0.808                    | 0.780 | 0.416    | 0.437 | 0.561      | 0.478 | 0.055      | 0.099 | 0.624        | 0.525 | 0.539            | 0.233 |
| Cassiduloidea         | 0.947                    | 0.818 | 0.376    | 0.404 | 0.410      | 0.558 | 0.008      | 0.090 | 0.529        | 0.610 | 0.444            | 0.315 |
| Clypeasteroidea       | 0.976                    | 0.810 | 0.386    | 0.411 | 0.651      | 0.559 | 0.006      | 0.099 | 0.728        | 0.625 | 0.676            | 0.322 |
| Disasteroidea         | 0.941                    | 0.824 | 0.518    | 0.428 | 0.374      | 0.546 | 0.049      | 0.182 | 0.347        | 0.556 | 0.085            | 0.267 |
| Holasteroidea         | 0.816                    | 0.801 | 0.410    | 0.419 | 0.621      | 0.536 | 0.040      | 0.104 | 0.665        | 0.591 | 0.432            | 0.296 |
| Hypsaleriinae         | 0.680                    | 0.827 | 0.417    | 0.462 | 0.797      | 0.592 | 0.280      | 0.409 | 0.919        | 0.623 | 0.792            | 0.313 |

| Analyzed Taxon               | Cum. Disp. $\frac{S}{2}$ |       | Clade CG |       | Paracl. CG |       | Pair Anag. |       | Paracl. Dur. |       | "Living Fossils" |       |
|------------------------------|--------------------------|-------|----------|-------|------------|-------|------------|-------|--------------|-------|------------------|-------|
|                              | Obs.                     | Exp.  | Obs.     | Exp.  | Obs.       | Exp.  | Obs.       | Exp.  | Obs.         | Exp.  | Obs.             | Exp.  |
| Irregularia                  | 0.968                    | 0.835 | 0.385    | 0.424 | 0.421      | 0.608 | 0.189      | 0.132 | 0.478        | 0.664 | 0.438            | 0.333 |
| Loveniidae                   | 1.003                    | 0.913 | 0.458    | 0.446 | 0.666      | 0.511 | 0.060      | 0.292 | 0.706        | 0.520 | 0.702            | 0.234 |
| Mesozoic Echinoidea          | 0.806                    | 0.776 | 0.279    | 0.424 | 0.486      | 0.532 | 0.172      | 0.183 | 0.552        | 0.566 | 0.505            | 0.281 |
| Ordovician Echinoidea        | 1.097                    | 0.845 | 0.536    | 0.478 | 0.657      | 0.508 | 0.340      | 0.509 | 0.577        | 0.483 | 0.361            | 0.182 |
| Somaliasteridae              | 1.031                    | 0.818 | 0.402    | 0.441 | 0.633      | 0.602 | 0.088      | 0.185 | 0.642        | 0.653 | 0.242            | 0.329 |
| Spatangoidea                 | 0.892                    | 0.813 | 0.283    | 0.398 | 0.649      | 0.541 | 0.002      | 0.107 | 0.766        | 0.595 | 0.764            | 0.309 |
| Spatangoidea                 | 0.964                    | 0.831 | 0.304    | 0.415 | 0.504      | 0.513 | 0.162      | 0.121 | 0.590        | 0.559 | 0.583            | 0.287 |
| Temnopleuridae               | 1.074                    | 0.833 | 0.568    | 0.471 | 0.806      | 0.564 | 0.057      | 0.263 | 0.760        | 0.586 | 0.417            | 0.257 |
| Toxasteridae                 | 0.963                    | 0.812 | 0.345    | 0.468 | 0.346      | 0.441 | 0.431      | 0.177 | 0.397        | 0.454 | 0.193            | 0.202 |
| <i>Hindeodus–Isarcicella</i> | 0.763                    | 0.820 | 0.490    | 0.439 | 0.799      | 0.741 | 0.124      | 0.117 | 0.950        | 0.870 | 0.583            | 0.423 |
| <i>Kockelella</i>            | 0.580                    | 0.841 | 0.416    | 0.483 | 0.755      | 0.678 | 0.327      | 0.355 | 0.713        | 0.662 | 0.514            | 0.258 |
| <i>Palmatolepis</i>          | 0.755                    | 0.750 | 0.388    | 0.443 | 0.714      | 0.658 | 0.248      | 0.339 | 0.768        | 0.709 | 0.175            | 0.365 |
| Thyestiidae                  | 0.919                    | 0.891 | 0.661    | 0.462 | 0.703      | 0.584 | 0.073      | 0.314 | 0.640        | 0.586 | 0.192            | 0.242 |
| Pteraspidiformes             | 1.002                    | 0.842 | 0.507    | 0.468 | 0.483      | 0.466 | 0.248      | 0.230 | 0.492        | 0.477 | 0.216            | 0.202 |
| Actinolepidae                | 0.878                    | 0.788 | 0.461    | 0.462 | 0.629      | 0.687 | 0.235      | 0.270 | 0.683        | 0.708 | 0.134            | 0.315 |
| Arthrodira                   | 0.825                    | 0.807 | 0.598    | 0.462 | 0.607      | 0.641 | 0.259      | 0.195 | 0.602        | 0.667 | 0.319            | 0.276 |
| Bothriolepidae               | 0.435                    | 0.721 | 0.534    | 0.494 | 0.288      | 0.529 | 0.623      | 0.506 | 0.313        | 0.526 | 0.015            | 0.107 |
| Eubrachythoraci              | 0.963                    | 0.861 | 0.361    | 0.481 | 0.622      | 0.527 | 0.403      | 0.394 | 0.671        | 0.521 | 0.265            | 0.201 |
| Phyllolepidae                | 0.755                    | 0.794 | 0.585    | 0.460 | 0.640      | 0.686 | 0.167      | 0.176 | 0.667        | 0.719 | 0.361            | 0.297 |
| Selenosteidae                | 0.659                    | 0.787 | 0.489    | 0.452 | 0.714      | 0.726 | 0.729      | 0.510 | 0.552        | 0.705 | 0.250            | 0.345 |
| Basal Chondrichthyes         | 0.994                    | 0.833 | 0.410    | 0.500 | 0.955      | 0.482 | 0.082      | 0.474 | 1.000        | 0.479 | 1.000            | 0.147 |
| Amblypteridae                | 0.903                    | 0.819 | 0.593    | 0.439 | 0.359      | 0.522 | 0.298      | 0.115 | 0.305        | 0.543 | 0.096            | 0.285 |
| Amiidae                      | 1.019                    | 0.725 | 0.535    | 0.458 | 0.712      | 0.611 | 0.342      | 0.326 | 0.691        | 0.624 | 0.532            | 0.276 |
| Basal Teleostei              | 0.903                    | 0.778 | 0.472    | 0.478 | 0.414      | 0.525 | 0.297      | 0.286 | 0.405        | 0.551 | 0.181            | 0.227 |
| Devonian Palaeonisciformes   | 0.903                    | 0.784 | 0.456    | 0.446 | 0.585      | 0.570 | 0.420      | 0.497 | 0.647        | 0.591 | 0.390            | 0.278 |
| Ginglymodi                   | 0.746                    | 0.810 | 0.396    | 0.469 | 0.620      | 0.555 | 0.429      | 0.249 | 0.652        | 0.583 | 0.544            | 0.246 |
| Osteoglossomorphes           | 0.848                    | 0.838 | 0.483    | 0.451 | 0.609      | 0.539 | 0.251      | 0.396 | 0.635        | 0.500 | 0.494            | 0.214 |
| Perleidiformes               | 0.966                    | 0.842 | 0.454    | 0.445 | 0.663      | 0.628 | 0.200      | 0.341 | 0.704        | 0.663 | 0.444            | 0.363 |
| Scanalepiformes              | 0.826                    | 0.806 | 0.614    | 0.448 | 0.670      | 0.595 | 0.545      | 0.474 | 0.612        | 0.599 | 0.334            | 0.262 |
| Tetradontiformes             | 1.080                    | 0.781 | 0.528    | 0.440 | 0.328      | 0.482 | 0.530      | 0.358 | 0.339        | 0.471 | 0.124            | 0.205 |
| Basal Sarcopterygia          | 0.973                    | 0.770 | 0.548    | 0.448 | 0.703      | 0.611 | 0.122      | 0.289 | 0.676        | 0.608 | 0.380            | 0.256 |
| Basal Sarcopterygia          | 0.946                    | 0.783 | 0.402    | 0.451 | 0.663      | 0.690 | 0.184      | 0.281 | 0.677        | 0.631 | 0.448            | 0.294 |

| Analyzed Taxon         | Cum. Disp. $\frac{S}{2}$ |       | Clade CG |       | Paracl. CG |       | Pair Anag. |       | Paracl. Dur. |       | "Living Fossils" |       |
|------------------------|--------------------------|-------|----------|-------|------------|-------|------------|-------|--------------|-------|------------------|-------|
|                        | Obs.                     | Exp.  | Obs.     | Exp.  | Obs.       | Exp.  | Obs.       | Exp.  | Obs.         | Exp.  | Obs.             | Exp.  |
| Coelocanthiformes      | 0.872                    | 0.834 | 0.620    | 0.435 | 0.335      | 0.594 | 0.383      | 0.298 | 0.309        | 0.585 | 0.110            | 0.279 |
| Coelocanthiformes      | 0.742                    | 0.805 | 0.570    | 0.468 | 0.371      | 0.613 | 0.395      | 0.290 | 0.365        | 0.653 | 0.031            | 0.261 |
| Devonian Dipnoi        | 0.945                    | 0.809 | 0.425    | 0.457 | 0.738      | 0.614 | 0.293      | 0.329 | 0.817        | 0.604 | 0.569            | 0.248 |
| Mesozoic Dipnoi        | 1.110                    | 0.837 | 0.540    | 0.479 | 0.275      | 0.441 | 0.697      | 0.531 | 0.205        | 0.390 | 0.080            | 0.140 |
| Rhipidistia            | 1.125                    | 0.774 | 0.463    | 0.453 | 0.529      | 0.592 | 0.184      | 0.307 | 0.577        | 0.599 | 0.193            | 0.252 |
| Early Tetrapoda        | 0.714                    | 0.819 | 0.591    | 0.433 | 0.286      | 0.535 | 0.609      | 0.397 | 0.297        | 0.569 | 0.069            | 0.262 |
| Basal Temnospondyli    | 1.073                    | 0.804 | 0.525    | 0.446 | 0.607      | 0.555 | 0.368      | 0.524 | 0.647        | 0.604 | 0.294            | 0.292 |
| Brachyopoidea          | 1.023                    | 0.785 | 0.700    | 0.439 | 0.613      | 0.618 | 0.214      | 0.384 | 0.588        | 0.598 | 0.321            | 0.299 |
| Branchiosauridae       | 1.053                    | 0.817 | 0.477    | 0.462 | 0.416      | 0.604 | 0.322      | 0.219 | 0.445        | 0.656 | 0.252            | 0.287 |
| Capitosauria           | 0.879                    | 0.779 | 0.518    | 0.442 | 0.564      | 0.628 | 0.187      | 0.254 | 0.584        | 0.670 | 0.168            | 0.348 |
| Capitosauridae         | 1.111                    | 0.897 | 0.430    | 0.455 | 0.569      | 0.619 | 0.607      | 0.355 | 0.566        | 0.660 | 0.243            | 0.346 |
| Dvinosauridae          | 0.850                    | 0.888 | 0.514    | 0.492 | 0.588      | 0.600 | 0.451      | 0.394 | 0.554        | 0.612 | 0.222            | 0.237 |
| Edopoidea              | 0.932                    | 0.916 | 0.516    | 0.461 | 0.570      | 0.617 | 0.364      | 0.264 | 0.563        | 0.657 | 0.150            | 0.302 |
| Mastodonsauroida       | 0.972                    | 0.845 | 0.513    | 0.458 | 0.675      | 0.683 | 0.150      | 0.120 | 0.669        | 0.761 | 0.480            | 0.322 |
| Rhytidosteoidea        | 1.434                    | 0.767 | 0.456    | 0.446 | 0.645      | 0.629 | 0.506      | 0.545 | 0.628        | 0.676 | 0.192            | 0.310 |
| Stegocephalia          | 0.945                    | 0.877 | 0.436    | 0.472 | 0.625      | 0.668 | 0.269      | 0.271 | 0.667        | 0.669 | 0.379            | 0.304 |
| Stereospondylia        | 0.899                    | 0.822 | 0.380    | 0.450 | 0.693      | 0.657 | 0.189      | 0.276 | 0.751        | 0.721 | 0.688            | 0.334 |
| Basal Synapsida        | 1.100                    | 0.803 | 0.397    | 0.443 | 0.582      | 0.546 | 0.318      | 0.448 | 0.619        | 0.567 | 0.300            | 0.261 |
| Varanopidae            | 1.182                    | 0.831 | 0.350    | 0.454 | 0.682      | 0.619 | 0.515      | 0.445 | 0.775        | 0.658 | 0.515            | 0.333 |
| Anomodontia            | 0.999                    | 0.811 | 0.508    | 0.440 | 0.412      | 0.514 | 0.334      | 0.317 | 0.421        | 0.519 | 0.196            | 0.239 |
| Cynodontia             | 0.856                    | 0.827 | 0.382    | 0.479 | 0.540      | 0.518 | 0.518      | 0.371 | 0.584        | 0.527 | 0.335            | 0.210 |
| Dicynodontia           | 0.970                    | 0.820 | 0.472    | 0.466 | 0.606      | 0.504 | 0.147      | 0.313 | 0.591        | 0.479 | 0.232            | 0.203 |
| Eutheriodontia         | 0.676                    | 0.816 | 0.481    | 0.437 | 0.364      | 0.542 | 0.466      | 0.286 | 0.367        | 0.557 | 0.159            | 0.295 |
| Eutherocephalia        | 0.886                    | 0.806 | 0.585    | 0.439 | 0.748      | 0.600 | 0.165      | 0.282 | 0.765        | 0.652 | 0.378            | 0.335 |
| Traversodontidae       | 0.893                    | 0.842 | 0.535    | 0.469 | 0.420      | 0.598 | 0.383      | 0.318 | 0.429        | 0.601 | 0.067            | 0.252 |
| Amphilestidae          | 0.921                    | 0.790 | 0.606    | 0.463 | 0.589      | 0.524 | 0.261      | 0.350 | 0.571        | 0.537 | 0.086            | 0.235 |
| Anomaluroidea          | 1.116                    | 0.823 | 0.543    | 0.447 | 0.303      | 0.488 | 0.506      | 0.422 | 0.322        | 0.496 | 0.098            | 0.240 |
| Anthracotheriidae      | 1.098                    | 0.797 | 0.516    | 0.462 | 0.854      | 0.624 | 0.237      | 0.435 | 0.956        | 0.652 | 0.824            | 0.254 |
| Arctoidea              | 0.741                    | 0.829 | 0.559    | 0.449 | 0.770      | 0.555 | 0.216      | 0.250 | 0.716        | 0.569 | 0.321            | 0.279 |
| Basal Aplodontoidea    | 0.767                    | 0.795 | 0.345    | 0.459 | 0.693      | 0.575 | 0.109      | 0.196 | 0.741        | 0.594 | 0.601            | 0.235 |
| Basal Cetacea          | 0.855                    | 0.823 | 0.459    | 0.483 | 0.240      | 0.430 | 0.703      | 0.536 | 0.217        | 0.360 | 0.056            | 0.134 |
| Basal Ctenodactyloidea | 0.783                    | 0.857 | 0.506    | 0.471 | 0.657      | 0.533 | 0.444      | 0.365 | 0.683        | 0.522 | 0.385            | 0.224 |



| Analyzed Taxon      | Cum. Disp. $\frac{S}{2}$ |       | Clade CG |       | Paracl. CG |       | Pair Anag. |       | Paracl. Dur. |       | "Living Fossils" |       |
|---------------------|--------------------------|-------|----------|-------|------------|-------|------------|-------|--------------|-------|------------------|-------|
|                     | Obs.                     | Exp.  | Obs.     | Exp.  | Obs.       | Exp.  | Obs.       | Exp.  | Obs.         | Exp.  | Obs.             | Exp.  |
| Basal Ruminantia    | 1.002                    | 0.864 | 0.544    | 0.469 | 0.606      | 0.545 | 0.261      | 0.407 | 0.676        | 0.551 | 0.323            | 0.240 |
| Borhyaenoidea       | 0.837                    | 0.760 | 0.527    | 0.466 | 0.332      | 0.477 | 0.486      | 0.567 | 0.299        | 0.469 | 0.039            | 0.157 |
| Borophaginae        | 0.683                    | 0.771 | 0.497    | 0.439 | 0.421      | 0.479 | 0.158      | 0.154 | 0.397        | 0.514 | 0.137            | 0.234 |
| Brontotheriidae     | 0.890                    | 0.783 | 0.453    | 0.457 | 0.454      | 0.486 | 0.135      | 0.233 | 0.468        | 0.483 | 0.151            | 0.207 |
| Carnivoramorpha     | 0.817                    | 0.833 | 0.410    | 0.440 | 0.478      | 0.560 | 0.162      | 0.231 | 0.507        | 0.578 | 0.335            | 0.277 |
| Carpolestidae       | 0.763                    | 0.800 | 0.536    | 0.471 | 0.336      | 0.355 | 0.595      | 0.608 | 0.299        | 0.319 | 0.102            | 0.111 |
| Ceratomorpha        | 0.582                    | 0.810 | 0.577    | 0.436 | 0.684      | 0.584 | 0.126      | 0.266 | 0.817        | 0.573 | 0.804            | 0.280 |
| Chalicotheriidae    | 0.883                    | 0.863 | 0.611    | 0.462 | 0.667      | 0.494 | 0.099      | 0.377 | 0.652        | 0.482 | 0.177            | 0.209 |
| Cormohipparion      | 1.084                    | 0.839 | 0.367    | 0.438 | 0.161      | 0.308 | 0.836      | 0.620 | 0.150        | 0.291 | 0.042            | 0.124 |
| Cretaceous Eutheria | 0.927                    | 0.844 | 0.424    | 0.469 | 0.509      | 0.464 | 0.296      | 0.379 | 0.469        | 0.454 | 0.271            | 0.191 |
| Dichobunidae        | 0.764                    | 0.828 | 0.388    | 0.437 | 0.405      | 0.569 | 0.448      | 0.279 | 0.442        | 0.581 | 0.168            | 0.296 |
| Didolodontidae      | 0.850                    | 0.776 | 0.643    | 0.441 | 0.411      | 0.634 | 0.325      | 0.375 | 0.392        | 0.706 | <0.001           | 0.378 |
| Elephantiformes     | 0.975                    | 0.799 | 0.328    | 0.422 | 0.718      | 0.604 | 0.040      | 0.244 | 0.827        | 0.600 | 0.772            | 0.291 |
| Eocene Equidae      | 0.633                    | 0.797 | 0.438    | 0.466 | 0.456      | 0.586 | 0.536      | 0.273 | 0.416        | 0.633 | 0.034            | 0.278 |
| Eotheria            | 0.961                    | 0.813 | 0.483    | 0.444 | 0.568      | 0.562 | 0.223      | 0.279 | 0.554        | 0.598 | 0.262            | 0.292 |
| Equidae             | 0.838                    | 0.829 | 0.494    | 0.464 | 0.299      | 0.468 | 0.545      | 0.375 | 0.298        | 0.469 | 0.082            | 0.208 |
| Equinae             | 0.946                    | 0.849 | 0.548    | 0.446 | 0.339      | 0.473 | 0.486      | 0.329 | 0.312        | 0.495 | 0.085            | 0.279 |
| Hathliacynidae      | 1.072                    | 0.826 | 0.357    | 0.462 | 0.204      | 0.609 | 0.482      | 0.440 | 0.250        | 0.621 | 0.090            | 0.280 |
| Hippopotamidae      | 0.888                    | 0.834 | 0.481    | 0.456 | 0.335      | 0.602 | 0.349      | 0.302 | 0.381        | 0.588 | 0.112            | 0.271 |
| Hippotragini        | 1.005                    | 0.778 | 0.452    | 0.448 | 0.580      | 0.537 | 0.224      | 0.402 | 0.630        | 0.570 | 0.385            | 0.268 |
| Hominidae           | 0.872                    | 0.872 | 0.397    | 0.440 | 0.390      | 0.522 | 0.500      | 0.581 | 0.322        | 0.448 | 0.108            | 0.220 |
| Hominoidea          | 0.647                    | 0.857 | 0.520    | 0.480 | 0.487      | 0.461 | 0.537      | 0.592 | 0.494        | 0.469 | 0.026            | 0.168 |
| Hyaenidae           | 0.917                    | 0.868 | 0.431    | 0.440 | 0.511      | 0.647 | 0.118      | 0.194 | 0.548        | 0.679 | 0.208            | 0.340 |
| Hyaenodontida       | 0.876                    | 0.814 | 0.487    | 0.440 | 0.529      | 0.668 | 0.139      | 0.120 | 0.489        | 0.675 | 0.202            | 0.330 |
| Hypsodontidae       | 0.684                    | 0.806 | 0.525    | 0.450 | 0.571      | 0.490 | 0.550      | 0.515 | 0.587        | 0.506 | 0.304            | 0.239 |
| Louisinidae         | 1.007                    | 0.843 | 0.566    | 0.482 | 0.368      | 0.366 | 0.451      | 0.426 | 0.346        | 0.350 | 0.223            | 0.139 |
| Machairodontinae    | 1.059                    | 0.843 | 0.425    | 0.444 | 0.386      | 0.502 | 0.461      | 0.467 | 0.419        | 0.529 | 0.191            | 0.269 |
| Megalochinidae      | 0.986                    | 0.876 | 0.299    | 0.464 | 0.514      | 0.487 | 0.301      | 0.412 | 0.579        | 0.463 | 0.500            | 0.202 |
| Megalonychidae      | 0.781                    | 0.883 | 0.467    | 0.443 | 0.636      | 0.509 | 0.252      | 0.341 | 0.629        | 0.534 | 0.549            | 0.308 |
| Mioclaenidae        | 0.873                    | 0.822 | 0.587    | 0.451 | 0.670      | 0.540 | 0.083      | 0.164 | 0.679        | 0.571 | 0.513            | 0.261 |
| Multituberculata    | 0.840                    | 0.844 | 0.405    | 0.461 | 0.359      | 0.547 | 0.498      | 0.344 | 0.281        | 0.496 | 0.138            | 0.218 |
| Mustellidae         | 0.641                    | 0.775 | 0.551    | 0.454 | 0.669      | 0.646 | 0.501      | 0.631 | 0.680        | 0.618 | 0.294            | 0.272 |

| Analyzed Taxon     | Cum. Disp. $\frac{S}{2}$ |       | Clade CG |       | Paracl. CG |       | Pair Anag. |       | Paracl. Dur. |       | "Living Fossils" |       |
|--------------------|--------------------------|-------|----------|-------|------------|-------|------------|-------|--------------|-------|------------------|-------|
|                    | Obs.                     | Exp.  | Obs.     | Exp.  | Obs.       | Exp.  | Obs.       | Exp.  | Obs.         | Exp.  | Obs.             | Exp.  |
| Mysticetiidae      | 1.036                    | 0.801 | 0.488    | 0.464 | 0.724      | 0.487 | 0.254      | 0.275 | 0.695        | 0.494 | 0.602            | 0.209 |
| Nimravinae         | 1.073                    | 0.833 | 0.451    | 0.465 | 0.631      | 0.490 | 0.222      | 0.626 | 0.639        | 0.379 | 0.511            | 0.134 |
| Notohippidae       | 0.846                    | 0.777 | 0.353    | 0.481 | 0.470      | 0.539 | 0.510      | 0.396 | 0.501        | 0.515 | 0.092            | 0.193 |
| Odobenidae         | 0.607                    | 0.823 | 0.448    | 0.467 | 0.308      | 0.411 | 0.567      | 0.493 | 0.314        | 0.404 | 0.018            | 0.155 |
| Omomyidae          | 0.851                    | 0.785 | 0.595    | 0.440 | 0.571      | 0.530 | 0.119      | 0.326 | 0.621        | 0.551 | 0.369            | 0.307 |
| Paucituberculata   | 0.775                    | 0.818 | 0.422    | 0.441 | 0.464      | 0.496 | 0.607      | 0.362 | 0.458        | 0.510 | 0.197            | 0.254 |
| Perissodactyla     | 0.789                    | 0.868 | 0.401    | 0.458 | 0.456      | 0.466 | 0.347      | 0.457 | 0.487        | 0.460 | 0.370            | 0.212 |
| Protoselendonta    | 0.764                    | 0.819 | 0.396    | 0.440 | 0.448      | 0.551 | 0.448      | 0.309 | 0.450        | 0.564 | 0.168            | 0.293 |
| Selenodonta        | 1.020                    | 0.892 | 0.561    | 0.458 | 0.457      | 0.580 | 0.316      | 0.298 | 0.444        | 0.548 | 0.119            | 0.235 |
| Splacotheriidae    | 0.880                    | 0.817 | 0.555    | 0.445 | 0.604      | 0.706 | 0.862      | 0.452 | 0.500        | 0.710 | 0.070            | 0.333 |
| Taeniodonta        | 0.986                    | 0.865 | 0.519    | 0.475 | 0.319      | 0.410 | 0.673      | 0.621 | 0.218        | 0.359 | 0.055            | 0.128 |
| Toxodontidae       | 1.027                    | 0.861 | 0.490    | 0.454 | 0.643      | 0.553 | 0.198      | 0.331 | 0.591        | 0.521 | 0.324            | 0.222 |
| Xenungulata        | 0.976                    | 0.875 | 0.392    | 0.460 | 0.470      | 0.315 | 0.248      | 0.332 | 0.451        | 0.294 | 0.295            | 0.134 |
| Zapodidae          | 0.867                    | 0.822 | 0.455    | 0.468 | 0.611      | 0.568 | 0.167      | 0.225 | 0.596        | 0.610 | 0.231            | 0.250 |
| Ankyramorpha       | 1.063                    | 0.798 | 0.530    | 0.441 | 0.592      | 0.653 | 0.358      | 0.351 | 0.563        | 0.645 | 0.259            | 0.332 |
| Baenidae           | 0.971                    | 0.816 | 0.532    | 0.481 | 0.433      | 0.565 | 0.442      | 0.499 | 0.407        | 0.536 | 0.121            | 0.200 |
| Basal Testudinata  | 0.993                    | 0.780 | 0.428    | 0.469 | 0.198      | 0.513 | 0.489      | 0.370 | 0.237        | 0.515 | 0.084            | 0.194 |
| Leptopleuroninae   | 0.982                    | 0.825 | 0.486    | 0.479 | 0.310      | 0.571 | 0.829      | 0.505 | 0.274        | 0.574 | 0.005            | 0.213 |
| Millerettidae      | 0.959                    | 0.881 | 0.353    | 0.460 | 0.658      | 0.552 | 0.675      | 0.501 | 0.737        | 0.561 | 0.152            | 0.235 |
| Nanhsiungchelyidae | 0.922                    | 0.784 | 0.444    | 0.446 | 0.546      | 0.587 | 0.466      | 0.648 | 0.577        | 0.577 | 0.300            | 0.224 |
| Procolophonoidea   | 0.737                    | 0.786 | 0.585    | 0.446 | 0.431      | 0.565 | 0.583      | 0.499 | 0.351        | 0.505 | 0.054            | 0.220 |
| Cryptocleidoidea   | 0.801                    | 0.836 | 0.479    | 0.472 | 0.324      | 0.442 | 0.536      | 0.626 | 0.306        | 0.431 | 0.078            | 0.138 |
| Ichthyosauria      | 0.871                    | 0.802 | 0.602    | 0.455 | 0.218      | 0.496 | 0.621      | 0.331 | 0.188        | 0.524 | 0.026            | 0.215 |
| Mosasauridae       | 0.926                    | 0.801 | 0.377    | 0.430 | 0.579      | 0.637 | 0.303      | 0.252 | 0.637        | 0.651 | 0.545            | 0.350 |
| Nothosaurus        | 1.131                    | 0.820 | 0.423    | 0.447 | 0.533      | 0.573 | 0.403      | 0.433 | 0.551        | 0.602 | 0.349            | 0.310 |
| Placodontia        | 0.870                    | 0.901 | 0.525    | 0.467 | 0.635      | 0.553 | 0.303      | 0.508 | 0.595        | 0.538 | 0.173            | 0.218 |
| Plesiosauridae     | 0.756                    | 0.799 | 0.521    | 0.490 | 0.699      | 0.562 | 0.370      | 0.453 | 0.693        | 0.588 | 0.296            | 0.202 |
| Plesiosauroidea    | 0.785                    | 0.816 | 0.546    | 0.465 | 0.599      | 0.563 | 0.262      | 0.284 | 0.565        | 0.570 | 0.288            | 0.231 |
| Polycotylidae      | 0.719                    | 0.780 | 0.442    | 0.474 | 0.517      | 0.558 | 0.334      | 0.631 | 0.549        | 0.507 | 0.381            | 0.183 |
| Sphenodontia       | 1.011                    | 0.848 | 0.542    | 0.448 | 0.537      | 0.571 | 0.442      | 0.394 | 0.457        | 0.527 | 0.206            | 0.225 |
| Archosauromorpha   | 0.887                    | 0.810 | 0.597    | 0.485 | 0.641      | 0.567 | 0.347      | 0.338 | 0.493        | 0.561 | 0.210            | 0.219 |
| Basal Crocodylia   | 0.983                    | 0.874 | 0.528    | 0.466 | 0.742      | 0.565 | 0.370      | 0.468 | 0.883        | 0.590 | 0.667            | 0.233 |

| Analyzed Taxon        | Cum. Disp. $\frac{S}{2}$ |       | Clade CG |       | Paracl. CG |       | Pair Anag. |       | Paracl. Dur. |       | "Living Fossils" |       |
|-----------------------|--------------------------|-------|----------|-------|------------|-------|------------|-------|--------------|-------|------------------|-------|
|                       | Obs.                     | Exp.  | Obs.     | Exp.  | Obs.       | Exp.  | Obs.       | Exp.  | Obs.         | Exp.  | Obs.             | Exp.  |
| Basal Crocodyliformes | 0.967                    | 0.784 | 0.380    | 0.446 | 0.593      | 0.556 | 0.241      | 0.318 | 0.585        | 0.569 | 0.276            | 0.248 |
| Basal Crurotarsia     | 0.931                    | 0.824 | 0.567    | 0.442 | 0.635      | 0.661 | 0.359      | 0.434 | 0.690        | 0.621 | 0.467            | 0.273 |
| Chroniosuchia         | 0.548                    | 0.815 | 0.483    | 0.482 | 0.553      | 0.513 | 0.535      | 0.397 | 0.745        | 0.524 | 0.677            | 0.162 |
| Crocodylia            | 0.938                    | 0.782 | 0.345    | 0.480 | 0.531      | 0.579 | 0.352      | 0.274 | 0.588        | 0.543 | 0.342            | 0.210 |
| Diplocynodontinae     | 1.070                    | 0.773 | 0.512    | 0.425 | 0.375      | 0.598 | 0.388      | 0.295 | 0.381        | 0.588 | 0.093            | 0.263 |
| Dyrosauridae          | 1.024                    | 0.843 | 0.700    | 0.447 | 0.286      | 0.579 | 0.358      | 0.430 | 0.207        | 0.621 | <0.001           | 0.306 |
| Metriorhynchidae      | 0.876                    | 0.774 | 0.527    | 0.464 | 0.568      | 0.419 | 0.322      | 0.404 | 0.509        | 0.404 | 0.220            | 0.165 |
| Metriorhynchinae      | 0.612                    | 0.806 | 0.650    | 0.480 | 0.436      | 0.375 | 0.557      | 0.531 | 0.431        | 0.335 | 0.187            | 0.123 |
| Phytosauridae         | 0.766                    | 0.824 | 0.417    | 0.450 | 0.382      | 0.510 | 0.741      | 0.556 | 0.401        | 0.536 | 0.109            | 0.278 |
| Phytosauroida         | 0.922                    | 0.838 | 0.386    | 0.388 | 0.725      | 0.662 | 0.729      | 0.453 | 0.864        | 0.746 | 0.854            | 0.602 |
| Protosuchidae         | 0.876                    | 0.806 | 0.452    | 0.447 | 0.480      | 0.567 | 0.620      | 0.525 | 0.580        | 0.584 | 0.453            | 0.256 |
| Sebecosuchia          | 1.045                    | 0.749 | 0.444    | 0.472 | 0.662      | 0.503 | 0.402      | 0.544 | 0.590        | 0.452 | 0.380            | 0.162 |
| Thalattosauriformes   | 0.903                    | 0.851 | 0.563    | 0.444 | 0.616      | 0.663 | 0.791      | 0.451 | 0.679        | 0.667 | 0.441            | 0.371 |
| Basal Pterosauria     | 0.916                    | 0.793 | 0.473    | 0.450 | 0.390      | 0.564 | 0.466      | 0.423 | 0.447        | 0.585 | 0.173            | 0.262 |
| Pterosauria           | 0.877                    | 0.793 | 0.458    | 0.452 | 0.404      | 0.539 | 0.177      | 0.199 | 0.411        | 0.559 | 0.127            | 0.227 |
| Allosauroida          | 0.949                    | 0.896 | 0.333    | 0.447 | 0.397      | 0.656 | 0.842      | 0.432 | 0.535        | 0.669 | 0.236            | 0.292 |
| Ankylosauria          | 0.869                    | 0.838 | 0.416    | 0.474 | 0.709      | 0.663 | 0.209      | 0.306 | 0.750        | 0.620 | 0.538            | 0.245 |
| Ankylosauroida        | 0.933                    | 0.915 | 0.411    | 0.465 | 0.637      | 0.629 | 0.381      | 0.394 | 0.649        | 0.586 | 0.399            | 0.259 |
| Basal Iguanodontia    | 0.856                    | 0.837 | 0.400    | 0.446 | 0.458      | 0.520 | 0.653      | 0.556 | 0.488        | 0.523 | 0.138            | 0.218 |
| Carcharodontosauria   | 1.052                    | 0.797 | 0.612    | 0.474 | 0.430      | 0.591 | 0.540      | 0.657 | 0.414        | 0.440 | 0.114            | 0.140 |
| Ceratopsidae          | 0.816                    | 0.779 | 0.402    | 0.449 | 0.548      | 0.489 | 0.411      | 0.595 | 0.567        | 0.506 | 0.500            | 0.222 |
| Ceratosauria          | 1.061                    | 0.815 | 0.365    | 0.439 | 0.251      | 0.641 | 0.762      | 0.677 | 0.324        | 0.495 | 0.196            | 0.146 |
| Chasmosaurinae        | 0.844                    | 0.831 | 0.484    | 0.462 | 0.546      | 0.564 | 0.393      | 0.353 | 0.528        | 0.571 | 0.070            | 0.238 |
| Deinonychosauria      | 1.038                    | 0.796 | 0.494    | 0.461 | 0.595      | 0.528 | 0.443      | 0.614 | 0.650        | 0.450 | 0.159            | 0.156 |
| Diplodocoidea         | 0.723                    | 0.802 | 0.620    | 0.457 | 0.507      | 0.656 | 0.112      | 0.426 | 0.449        | 0.583 | 0.081            | 0.213 |
| Dromaeosauridae       | 1.167                    | 0.811 | 0.368    | 0.461 | 0.574      | 0.618 | 0.368      | 0.519 | 0.607        | 0.512 | 0.330            | 0.188 |
| Euornithopoda         | 1.166                    | 0.888 | 0.552    | 0.486 | 0.461      | 0.637 | 0.585      | 0.582 | 0.399        | 0.565 | 0.082            | 0.212 |
| Hadrosaurinae         | 0.847                    | 0.821 | 0.500    | 0.472 | 0.770      | 0.529 | 0.311      | 0.507 | 0.795        | 0.538 | 0.638            | 0.204 |
| Hadrosauroida         | 0.929                    | 0.738 | 0.334    | 0.440 | 0.433      | 0.593 | 0.309      | 0.313 | 0.545        | 0.621 | 0.356            | 0.284 |
| Megalosauroida        | 0.549                    | 0.869 | 0.699    | 0.438 | 0.692      | 0.549 | 0.478      | 0.579 | 0.577        | 0.534 | 0.143            | 0.190 |
| Neoceratopsia         | 0.806                    | 0.809 | 0.401    | 0.467 | 0.480      | 0.560 | 0.464      | 0.456 | 0.457        | 0.503 | 0.211            | 0.200 |
| Ornithopoda           | 0.874                    | 0.838 | 0.471    | 0.460 | 0.752      | 0.692 | 0.201      | 0.298 | 0.719        | 0.686 | 0.353            | 0.302 |

| Analyzed Taxon    | Cum. Disp. $\frac{S}{2}$ |       | Clade CG |       | Paracl. CG |       | Pair Anag. |       | Paracl. Dur. |       | "Living Fossils" |       |
|-------------------|--------------------------|-------|----------|-------|------------|-------|------------|-------|--------------|-------|------------------|-------|
|                   | Obs.                     | Exp.  | Obs.     | Exp.  | Obs.       | Exp.  | Obs.       | Exp.  | Obs.         | Exp.  | Obs.             | Exp.  |
| Oviraptorosauria  | 1.236                    | 0.795 | 0.382    | 0.466 | 0.632      | 0.556 | 0.563      | 0.595 | 0.669        | 0.477 | 0.343            | 0.152 |
| Prosauropoda      | 1.018                    | 0.821 | 0.563    | 0.462 | 0.526      | 0.665 | 0.250      | 0.396 | 0.549        | 0.620 | 0.332            | 0.256 |
| Saurolophidae     | 0.969                    | 0.781 | 0.433    | 0.443 | 0.710      | 0.547 | 0.279      | 0.373 | 0.635        | 0.515 | 0.436            | 0.241 |
| Titanosauriformes | 0.786                    | 0.816 | 0.518    | 0.452 | 0.558      | 0.578 | 0.361      | 0.408 | 0.530        | 0.616 | 0.086            | 0.259 |
| Sauropoda         | 0.846                    | 0.817 | 0.500    | 0.442 | 0.583      | 0.608 | 0.352      | 0.396 | 0.449        | 0.541 | 0.130            | 0.228 |
| Tyranosauroida    | 0.658                    | 0.736 | 0.357    | 0.440 | 0.439      | 0.584 | 0.706      | 0.459 | 0.409        | 0.579 | 0.103            | 0.255 |

1. Hanger RA & Strong EE (2000) Phylogeny of the Anopliidae (Brachiopoda: Chonetidina). *Hist Biol* 14(3/4):285 - 298.
2. Popov LE, Nikitin IF, & Sokiran EV (1999) The earliest atrypides and athyridides (Brachiopoda) from the Ordovician of Kazakhstan. *Palaeontology* 42(4):625-661.
3. Benedetto J (2009) *Chaniella* a new lower Tremadocian (Ordovician) brachiopod from northwestern Argentina and its phylogenetic relationships within basal rhynchonelliforms. *Paläontol Zeitschrift* 83(3):393-405.
4. Leighton LR & Maples CG (2002) Evaluating internal versus external characters: phylogenetic analyses of the Echinoconchidae, Buxtoniinae, and Juresaniinae (Phylum: Brachiopoda). *J Paleontol* 76(4):659 - 671.
5. Stigall Rode AL (2005) Systematic revision of the Middle and Late Devonian brachiopods *Schizophoria* (*Schizophoria*) and '*Schuchertella*' from North America. *J Syst Palaeontol* 3(2):133 - 167.
6. Mukherjee D (2007) A taxonomic and phylogenetic study of *Kutchithyris* – a Jurassic terebratulide from Kutch, India. *J Asian Earth Sci* 30(2):213-237.
7. Candela Y (2010) Phylogenetic relationships of leptellinid brachiopods. *Alcheringa* 35(3):413-426.
8. Egerquist E (1999) Revision of the Ordovician plectambonitoid brachiopod *Ujukella* Andreev and related genera. *Geologiska Föreningens i Stockholm Förhandlingar* 121(4):325 - 332.
9. Cusack M, Williams A, & Buckman JO (1999) Chemico-structural evolution of linguloid brachiopod shells. *Palaeontology* 42(5):799 - 840.
10. Monks N (2000) Functional morphology, ecology, and evolution of the Scaphitaceae Gill, 1871 (Cephalopoda). *J Mollusc Stud* 66(2):205-216.
11. Jin J & Popov LE (2008) A new genus of Late Ordovician-Early Silurian pentameride brachiopods and its phylogenetic relationships. *Acta Palaeontol Pol* 53(2):221-236.
12. Wright DF & Stigall AL (2013) Phylogenetic revision of the Late Ordovician orthid brachiopod genera *Plaesiomys* and *Hebertella* from Laurentia. *J Paleontol* 87(6):1107-1128.
13. Dewing K (2004) Shell structure and its bearing on the phylogeny of Late Ordovician-Early Silurian strophomenoid brachiopods from Anticosti Island, Quebec. *J Paleontol* 78(2):275 - 286.

14. Carlson SJ & Fitzgerald PC (2007) Sampling taxa, estimating phylogeny and inferring macroevolution: an example from Devonian terebratulide brachiopods. *Trans R Soc Edin* 98(Special Issue 3-4):311-325.
15. Popov LE, Vinn O, & Nikitina OI (2001) Brachiopods of the redefined family Tritoechiidae from the Ordovician of Kazakhstan and South Urals. *Geobios* 34(2):131-155.
16. Jin J, Zhan R-B, & Rong J-Y (2006) Taxonomic reassessment of two virgianid brachiopod genera from the Upper Ordovician and Lower Silurian of South China. *J Paleontol* 80(1):72 - 82.
17. Wagner PJ (1997) Patterns of morphologic diversification among the Rostroconchia. *Paleobiology* 23(1):115 - 150.
18. Mitchell SF (2013) Revision of the Antilocaprinidae Mac Gillavry (Hippuritida, Bivalvia) and their position within the Caprinoidea d'Orbigny. *Geobios* 46(5):423-446.
19. Schneider JA (1998) Phylogeny of the Cardiidae (Bivalvia): phylogenetic relationship and morphologic evolution within the subfamilies Clinocardiinae, Lymnocardiinae, Fraginae and Tridacninae. *Malacologia* 40(1-2):321 - 373.
20. Roopnarine PD (2001) A history of diversification, extinction, and invasion in tropical America as derived from species-level phylogenies of chionine genera (Family Veneridae). *J Paleontol* 75(3):644 - 657.
21. Anderson LC & Roopnarine PD (2003) Evolution and phylogenetic relationships of Neogene Corbulidae (Bivalvia; Myoidea) of tropical America. *J Paleontol* 77(6):1086 - 1102.
22. Schneider JA (1998) Phylogeny of stem-group eucardiids (Bivalvia: Cardiidae) and the significance of the transitional fossil *Perucardia*. *Malacologia* 40(1-2):37 - 62.
23. Skelton PW & Smith AB (2000) A preliminary phylogeny for rudist bivalves: sifting clades from grades. *The evolutionary biology of the Bivalvia*, eds Harper EM, Taylor JD, & Crame JA (Special Publication of the Geological Society, London, Geological Society, London), Vol 177, pp 97 - 127.
24. Rode AL (2004) Phylogenetic revision of *Leptodesma* (*Leiopteria*) (Devonian: Bivalvia). *Postilla* 229:1 - 26.
25. Simões MG, Marques AC, Cruz de Mello LH, & Anneli LE (1997) Phylogenetic analysis of the genera of the extinct family Megadesmidae (Bivalvia, Anomalodesmata), with remarks on its paleoecology and taxonomy. *J Comp Biol* 2(2):75 - 90.
26. Huelsenbeck JP (1994) Comparing the stratigraphic record to estimates of phylogeny. *Paleobiology* 20(4):470 - 483.
27. Monari S (2009) Phylogeny and biogeography of pholadid Bivalve *Barnea* (*Anchomasa*) with considerations on the phylogeny of Pholadoidea. *Acta Palaeontol Pol* 54(2):315-335.
28. Yacobucci MM (1999) Plasticity of developmental timing as the underlying cause of high speciation rates in ammonoids. An example from the Cenomanian Western Interior Seaway of North America. *Advancing research on living and fossil cephalopods*, eds Olóriz F & Rodríguez-Tovar FJ (Kluwer Academic / Plenum, New York), pp 59 - 77.
29. McGowan AJ & Smith AB (2007) Ammonoids across the Permian/Triassic boundary: a cladistic Perspective. *Palaeontology* 50(3):573-590.
30. Korn D (1997) Evolution of the Goniatitaceae and Viséan-Namurian biogeography. *Acta Palaeontol Pol* 42(2):177 - 199.
31. Monks N (2002) Cladistic analysis of a problematic ammonite group: the Hamitidae (Cretaceous, Albian-Turonian) and proposals for new cladistic terms. *Palaeontology* 45(4):689 - 707.

32. Moyne S & Neige P (2004) Cladistic analysis of the Middle Jurassic ammonite radiation. *Geol Mag* 141(1):115 - 123.
33. Rulleau L, Bécaud M, & Neige. P (2003) Ammonites generally classified in the Bouleiceratinae sub-family (Hildoceratidae, Toarcian): phylogenetic, biogeographic and systematic perspective. *Geobios* 36:317 - 348.
34. Cecca F & Rouget I (2006) Anagenetic evolution of the early Tithonian ammonite genus *Semiformiceras* tested with cladistic analysis. *Palaeontology* 49(5):1069 - 1080.
35. Monks N (1999) Cladistic analysis of Albian heteromorph ammonites. *Palaeontology* 42(5):907 - 925.
36. Wagner PJ (2001) Gastropod phylogenetics: progress, problems and implications. *J Paleontol* 75(6):1128 - 1140.
37. Michaux B (1989) Cladograms can reconstruct phylogenies: an example from the fossil record. *Alcheringa* 13(1):21 - 36.
38. de Maintenon MJ (2005) Phylogenetic relationships of the tropical American columbellid taxa *Conella*, *Euryppyrene*, and *Parametaria* (Gastropoda: Neogastropoda). *J Paleontol* 79(3):497 - 508.
39. Wagner PJ (1999) Phylogenetic relationships of the earliest anisostrophically coiled gastropods. *Smithson Contrib Paleobiol* 88:1 - 132.
40. Merle D & Pacaud J-M (2003) New species of *Eocithara* Fischer, 1883 (Mollusca, Gastropoda, Harpidae) from the Early Paleogene with phylogenetic analysis of the Harpidae. *Geodiversitas* 26(1):61 - 87.
41. Merle D (2005) *Jsowerbya*, new genus of Muricidae (Mollusca: Gastropoda) from the Eocene of the Paris (France) and Hampshire (England) basins with a phylogenetic assessment of its Ocenebrine versus Ergalataxine affinities. *Geobios* 38(4):505-517.
42. Haasl DM (2000) Phylogenetic relationships among nassariid gastropods. *J Paleontol* 74(5):839 - 852.
43. Vermeij GJ & Carlson SJ (2000) The muricid gastropod subfamily Rapaninae: phylogeny and ecological history. *Paleobiology* 26(1):19 - 46.
44. Nützel A, Erwin DH, & Mapes RH (2000) Identity and phylogeny of the Late Paleozoic Subulitoidea (Gastropoda). *J Paleontol* 74(4):575 - 598.
45. Wagner PJ (1995) Stratigraphic tests of cladistic hypotheses. *Paleobiology* 21(2):153 - 178.
46. Wagner PJ (1999) The utility of fossil data in phylogenetic analyses: a likelihood example using Ordovician-Silurian species of the Lophospiridae (Gastropoda: Murchisoniina). *Am Malacol Bull* 15(1):1 - 31.
47. Cotton TJ & Fortey RA (2005) Comparative morphology and relationships of the Agnostida. *Crustacea and arthropod relationships*, Crustacean Issues, eds Koenemann S & Jenner RA (Taylor & Francis, Boca Raton), Vol 16, pp 95-136.
48. Westrop SR, Ludvigsen R, & Kindle CH (1996) Marjuman (Cambrian) agnostoid trilobites of the Cow Head Group, western Newfoundland. *J Paleontol* 70(5):804 - 829.
49. Sundberg FA (1999) Redescription of *Alokistocare subcoronatum* (Hall and Whitfield, 1877), the type species of *Alokistocare*, and the status of Alokistocaridae Resser, 1939b (Ptychopariidae: Trilobita, Middle Cambrian. *J Paleontol* 73(6):1126 - 1143.
50. Lieberman BS (2002) Phylogenetic analysis of some basal Early Cambrian trilobites, the biogeographic origins of the Eutrlobita, and the timing of the Cambrian radiation. *J Paleontol* 76(4):692-708.

51. Ebbestad JOR & Budd GE (2002) Burlingiid trilobites from Norway, with a discussion of their affinities and relationships. *Palaeontology* 45(6):1171 - 1195.
52. Paterson JR & Edgecombe GD (2006) The Early Cambrian trilobite family Emuellidae Pocock, 1970: systematic position and revision of Australian species. *J Paleontol* 80(3):496-513.
53. Adrain JM & Westrop SR (2001) Stratigraphy, phylogeny, and species sampling in time and space. *Fossils, phylogeny and form An analytical approach*, eds Adrain JM, Edgecombe GD, & Lieberman BS (Topics in Geobiology, New York), Vol 19, pp 291 - 322.
54. Hughes NC & Rushton AWA (1990) Computer-aided restoration of a Late Cambrian ceratopygid trilobite from Wales, and its phylogenetic implications. *Palaeontology* 33(2):429-445.
55. Sundberg FA (2004) Cladistic analysis of Early-Middle Cambrian kochaspid trilobites (Ptychopariida). *J Paleontol* 78(5):920 - 940.
56. Lee S-b, Lee D-C, & Choi DK (2008) Cambrian-Ordovician trilobite family Missisquoiidae Hupè, 1955: systematic revision and palaeogeographical considerations based on cladistic analysis. *Palaeogeogr Palaeoclimatol Palaeoecol* 260(3-4):315-341.
57. Lieberman BS (2001) Phylogenetic analysis of the Olenellina Walcott, 1890 (Trilobita, Cambrian). *J Paleontol* 75(1):96 - 115.
58. Lieberman BS (1999) Testing the Darwinian legacy of the Cambrian radiation using trilobite phylogeny and biogeography. *J Paleontol* 73(2):176 - 181.
59. Sundberg FA & McCollum LB (1997) Oryctocephalids (Corynexochida: Trilobita) of the Lower-Middle Cambrian boundary interval from California and Nevada. *J Paleontol* 77(6):1065 - 1090.
60. Sundberg FA (2006) Taxonomic assignment of the Cambrian trilobite *Tonkinella* Mansuy, 1916 (Corynexochida), with a new species from California. *Mem Assoc Australasian Palaeontol* 32:59 - 74.
61. Babcock LE (1994) Systematics and phylogenetics of polymeroid trilobites from the Henson Gletscher and Kap Stanton Formations (Middle Cambrian), North Greenland. *Grønl Geolog Undersøg Bull* 169(1):79 - 127.
62. Hopkins MJ (2011) Species-level phylogenetic analysis of pterocephaliids (Trilobita, Cambrian) from the Great Basin, Western USA. *J Paleontol* 85(6):1128-1153.
63. Cotton TJ (2001) The phylogeny and systematics of blind Cambrian ptychoparioid trilobites. *Palaeontology* 44(1):167 - 207.
64. Bentley CJ & Jago JB (2004) Wuaniid trilobites of Australia. *Mem Assoc Australasian Palaeontol* 30:179 - 191.
65. Adrain JM (1998) Systematics of the Acanthoparyphinae (Trilobita), with species from the Silurian of Arctic Canada. *J Paleontol* 72(4):698 - 718.
66. Chatterton BDE, Edgecombe GD, Vaccari NE, & Waisfeld BG (1997) Ontogeny and relationships of the Ordovician odontopleurid trilobite *Ceratocara*, with new species from Argentina and New York. *J Paleontol* 71(1):108 - 125.

67. Congreve CR & Lieberman BS (2010) Phylogenetic and biogeographic analysis of deiphonine trilobites. *J Paleontol* 84(1):128 - 136.
68. Adrain JM, Westrop SR, Landing E, & Fortey RA (2001) Systematics of the Ordovician trilobites *Ischyrotoma* and *Dimeropygiella*, with species from the type Ibexian area, western U.S.A. *J Paleontol* 75(5):947 - 971.
69. Amati L, Feldmann RM, & Zonneveld J-P (2004) A new family of Triassic lobsters (Decapoda: Astacidea) from British Columbia and its phylogenetic context. *J Paleontol* 78(1):150-168.
70. Zhiyi Z, Wenwei Y, & Zhiqiang Z (2010) Evolutional trends and palaeobiogeography of the Ordovician trilobite *Ovalocephalus* Koroleva 1959. *Proc Biol Sci* 277(1679):257-266.
71. Wenwei Y, Fortey RA, & Turvey ST (2006) Ontogeny and relationships of the trilobite *Pseudopetigurus* Prantl and Přibyl. *Palaeontology* 49(3):537 - 546.
72. Gapp IW, Congreve CR, & Lieberman BS (2012) Unraveling the phylogenetic relationships of the Eccoptochilinae, an enigmatic array of Ordovician cheirurid trilobites. *PLoS ONE* 7(11):e49115.
73. Turvey ST (2002) Phylogeny of the Reedocalymeninae (Trilobita): implications for Early Ordovician biogeography of Gondwana. *Palaeobiogeography and biodiversity change: the Ordovician and Mesozoic-Cenozoic radiations*, eds Crame JA & Owen AW (Geological Society of London, Special Publications, London), Vol 194, pp 53 - 68.
74. Waisfeld BG, Vaccari NE, Chatterton BDE, & Edgecombe GD (2001) Systematics of Shumardiidae (Trilobita), with new species from the Ordovician of Argentina. *J Paleontol* 75(4):827 - 859.
75. Congreve CR & Lieberman BS (2011) Phylogenetic and biogeographic analysis of sphaerexochine trilobites. *PLoS ONE* 6(6):e21304.
76. Edgecombe GD, Chatterton BDE, Vaccari NE, & Waisfeld BG (1997) Ontogeny of the proetoid trilobite *Stenoblepharum*, and relationships of a new species from the Upper Ordovician of Argentina. *J Paleontol* 71(3):419-433.
77. Carlucci JR, Westrop SR, & Amati L (2010) Tetralichine Trilobites from the Upper Ordovician of Oklahoma and Virginia and phylogenetic systematics of the Tetralichini. *J Paleontol* 84(6):1099-1120.
78. Chatterton BDE, Edgecombe GD, Waisfeld BG, & Vaccari NE (1998) Ontogeny and systematics of Toernquistiidae (Trilobita, Proetida) from the Ordovician of the Argentine Precordillera. *J Paleontol* 72(2):273 - 303.
79. Ebach MC & Ahyong ST (2001) Phylogeny of the trilobite subgenus *Acanthopyge* (*Lobopyge*). *Cladistics* 17(1):1 - 10.
80. Adrain JM & Ramsköld L (1997) Silurian Odontopleurinae (Trilobita) from the Cape Phillips Formation, Arctic Canada. *J Paleontol* 71(2):237 - 261.
81. Adrain JM & Edgecombe GD (1997) Silurian (Wenlock) calymenid trilobites from the Cape Phillips Formation, Central Canadian Arctic. *J Paleontol* 71(4):657 - 682.
82. Ramsköld L & Chatterton BDE (1991) Revision and subdivision of the polyphyletic '*Leonaspis*' (Trilobita). *Trans R Soc Edin Earth Sci* 82:333 - 371.
83. Ramsköld L & Werdelin L (1991) The phylogeny and evolution of some phacopid trilobites. *Cladistics* 7(1):29 - 74.



84. Edgecombe G & Ramsköld L (1994) Earliest Devonian phacopide trilobites from central Bolivia. *Paläontol Zeitschrift* 68(3-4):397-410.
85. Ebach MC (2002) Lower Devonian trilobites from Cobar, New South Wales. *Rec W Aust Mus* 20(4):353 - 378.
86. Campbell MJ & Chatterton BDE (2007) Late Ordovician and Silurian lichid trilobites from Northwestern Canada: *Hemiarges*, *Borealarges*, and *Richterarges*. *J Paleontol* 81(6):1348 - 1364.
87. Lieberman BS & Kloc GJ (1997) Evolutionary and biogeographic patterns in the Asteropyginae (Trilobita, Devonian) Delo, 1935. *Bull Am Mus Nat Hist* 232:1 - 127.
88. Lieberman BS (1994) Evolution of the trilobite subfamily Proetinae Salter, 1864, and the origin, diversification, evolutionary affinity, and extinction of the Middle Devonian proetid fauna of eastern North America. *Bull Am Mus Nat Hist* 223:1 - 176.
89. Adrain JM, Chatterton BDE, & Kloc GJ (2008) Systematics of the Koneprusiine trilobites, with new taxa from the Silurian and Devonian of Laurentia. *J Paleontol* 82(4):657-675.
90. Lieberman BS, Edgecombe GD, & Eldredge N (1991) Systematics and biogeography of the “*Malvinella* group,” Calmoniidae (Trilobita, Devonian). *J Paleontol* 65(5):824 - 843.
91. Lieberman BS (1993) Systematics and biogeography of the “*Metacryphaeus* group” Calmoniidae (Trilobita, Devonian), with comments on adaptive radiations and the geological history of the Malvinokaffric Realm. *J Paleontol* 67(4):549 - 570.
92. Crônier C (2003) Systematic relationships of the blind phacopine trilobite *Trimerocephalus*, with a new species from Causses-et-Veyran, Montagne Noire. *Acta Palaeontol Pol* 48(1):55 - 70.
93. Brezinski DK (2008) Phylogenetics, systematics, paleoecology, and evolution of the trilobite genera *Paladin* and *Kaskia* from the United States. *J Paleontol* 82(3):511-527.
94. Brezinski DK (2003) Evolutionary and biogeographical implications of phylogenetic analysis of the Late Palaeozoic trilobite *Paladin*. *Spec Papers Palaeontol* 70:363 - 375.
95. Brezinski DK (2005) Paleobiogeographic patterns in Late Mississippian trilobites of the United States with new species from Montana. *Annals Carnegie Mus* 74(2):77 - 89.
96. Pollitt JR, Fortey RA, & Wills MA (2005) Systematics of the trilobite families Lichidae Hawle & Corda, 1847 and Lichakephalidae Tripp, 1957: the application of Bayesian inference to morphological data. *J Syst Palaeontol* 3(3):225 - 241.
97. Tetlie OE & Poschmann M (2008) Phylogeny and palaeoecology of the Adelophthalmoidea (Arthropoda; Chelicerata; Eurypterida). *J Syst Palaeontol* 6(2):237-249.
98. Cotton TJ & Braddy SJ (2003) The phylogeny of arachnomorph arthropods and the origin of the Chelicerata. *Tran R Soc Edin* 94(03):169-193.
99. Tetlie OE & Cuggy MB (2007) Phylogeny of the basal swimming eurypterids (Chelicerata; Eurypterida; Eurypterina). *J Syst Palaeontol* 5(3):345-356.
100. Tetlie OE (2006) Two new Silurian species of *Eurypterus* (Chelicerata: Eurypterida) from Norway and Canada and the phylogeny of the genus. *J Syst Palaeontol* 4(4):397 - 412.

101. Lamsdell JC, Braddy SJ, & Tetlie OE (2010) The systematics and phylogeny of the Stylonurina (Arthropoda: Chelicerata: Eurypterida). *J Syst Palaeontol* 8(1):49 - 61.
102. Rode AL & Babcock LE (2003) Phylogeny of fossil and extant freshwater crayfish and some closely related nephropid lobsters. *J Crustac Biol* 23(2):418 - 435.
103. Amati L & Westrop SR (2004) A systematic revision of *Thaleops* (Trilobita: Illaenidae) with new species from the Middle and Late Ordovician of Oklahoma and New York. *J Syst Palaeontol* 2(03):207-256.
104. Tinn O & Meidla T (2004) Phylogenetic relationships of Early–Middle Ordovician ostracods of Baltoscandia. *Palaeontology* 47(2):199 - 221.
105. Rode AL & Lieberman BS (2002) Phylogenetic and biogeographic analysis of Devonian phyllocarid crustaceans. *J Paleontol* 76(2):271 - 286.
106. Schram FR, Hof CHJ, & Steeman FA (1999) Thylacocephala (Arthropoda: Crustacea?) from the Cretaceous of Lebanon and implications for Thylacocephalan systematics. *Palaeontology* 52(5):769 - 797.
107. Karasawa H & Schweitzer CE (2006) A new classification of the Xanthoidea sensu lato (Crustacea: Decapoda: Brachyura) based on phylogenetic analysis and traditional systematics and evaluation of all fossil Xanthoidea sensu lato. *Contrib Zool* 75(1/2):23 - 73.
108. Ruta M (1999) A cladistic analysis of the anomalocystitid mitrates. *Zool J Linn Soc* 127(3):345 - 421.
109. Lee S-B, Lefebvre B, & Choi DK (2005) Latest Cambrian cornutes (Echinodermata: Stylophora) from the Taebaeksan Basin, Korea. *J Paleontol* 79(1):139 - 151.
110. Smith AB & Zamora S (2009) Rooting phylogenies of problematic fossil taxa; a case study using cinctans (stem-group echinoderms). *Palaeontology* 52(4):803-821.
111. Cripps AP (1991) A cladistic analysis of the cornutes (stem chordates). *Zool J Linn Soc* 102:333 - 366.
112. Daley PEJ (1992) The anatomy of the solute *Girvanicystis batheri* (?Chordata) from the Upper Ordovician of Scotland and a new species of *Girvanicystis* from the Upper Ordovician of South Wales. *Zool J Linn Soc* 105:353 - 375.
113. Lefebvre B (2001) A critical comment on ‘ankyroids’ (Echinodermata, Stylophora). *Geobios* 34(6):597 - 627.
114. Parsley RL (1997) The echinoderm classes Stylophora and Homoiostelea: non Calcichordata. *Geobiology of echinoderms*, The Paleontological Society Papers, eds Waters JA & Maples CG (The Paleontological Society, Knoxville), Vol 3, pp 225 - 248.
115. Parsley RL & Sumrall CD (2007) New recumbent echinoderm genera from the Bois d'Arc Formation: Lower Devonian (Lochkovian) of Coal County, Oklahoma. *J Paleontol* 81(6):1486–1493.
116. Ruta M & Theron JN (1997) Two Devonian mitrates from South Africa. *Palaeontology* 40(1):201 - 243.
117. Ruta M (1997) A new mitrate from the Lower Ordovician of Southern France. *Palaeontology* 40(2):363 - 383.
118. Smith AB & Arbizu MA (1987) Inverse larval development in a Devonian edrioasteroid from Spain and the phylogeny of Agelacrinitinae. *Lethaia* 20(1):49 - 62.

119. Sumrall CD & Gahn FJ (2006) Morphological and systematic reinterpretation of two enigmatic edrioasteroids (Echinodermata) from Canada. *Can J Earth Sciences* 43(4):497 - 507.
120. Sumrall CD & Zamora S (2011) Ordovician edrioasteroids from Morocco: faunal exchanges across the Rheic Ocean. *J Syst Palaeontol* 9(3):425-454.
121. Dean Shackleton J (2005) Skeletal homologies, phylogeny and classification of the earliest asterozoan echinoderms. *J Syst Palaeontol* 3(01):29-114.
122. Blake DB (2010) *Comptoniaster adamsi* nov. sp. (Echinodermata, Asteroidea) from the middle Cretaceous of Texas and its phylogenetic position. *Geobios* 43(2):179-190.
123. Sumrall CD & Sprinkle J (1995) Plating and pectinirhombs of the Ordovician rhombiferan *Plethoschisma*. *J Paleontol* 69(4):772 - 779.
124. Bodenbender BE (1995) Morphological, crystallographic, and stratigraphic data in cladistic analyses of blastoid phylogeny. *Contrib Mus Paleontol Univ Mich* 29(9):201 - 257.
125. Sumrall CD & Brett CE (2002) A revision of *Novacystis hawkesi* Paul and Bolton 1991 (Middle Silurian: Glyptocystitida, Echinodermata) and the phylogeny of early callocystitids. *J Paleontol* 76(4):733-740.
126. Ausich WI (1998) Early phylogeny and subclass division of the Crinoidea (Phylum Echinodermata). *J Paleontol* 72(3):499 - 510.
127. Gahn FJ & Kammer TW (2002) The cladid crinoid *Barycrinus* from the Burlington Limestone (Early Osagean) and the phylogenetics of Mississippian botyrocrinids. *J Paleontol* 76(1):123 - 133.
128. Harvey EW & Ausich WI (1997) Phylogeny of calceocrinid crinoids (Paleozoic: Echinodermata): biogeography and mosaic evolution. *J Paleontol* 71(2):299 - 305.
129. Ausich WI (1998) Phylogeny of Arenig to Caradoc crinoids (Phylum Echinodermata) and suprageneric classification of the Crinoidea. *Univ Kansas Paleontol Contrib* 9:1 - 36.
130. Brower JC (2001) Flexible crinoids from the Upper Ordovician Maquoketa formation of the northern midcontinent and the evolution of early flexible crinoids. *J Paleontol* 75(2):370 - 382.
131. Kammer TW & Gahn FJ (2003) Primitive cladid crinoids from the early Osagean Burlington Limestone and the phylogenetics of Mississippian species of *Cyathocrinites*. *J Paleontol* 77(1):121 - 138.
132. Kammer TW & Ausich WI (2007) New cladid and flexible crinoids from the Mississippian (Tournaisian, Ivorian) of England and Wales. *Palaeontology* 50(5):1039-1050.
133. Ausich WI & Kammer TW (2008) Evolution and extinction of a Paleozoic crinoid clade: phylogenetics, paleogeography, and environmental distribution of the periechocrinids. *Echinoderm paleobiology*, eds Ausich WI & Webster GD (Indiana University Press, Bloomington), pp 145 - 171.
134. Smith AB & Wright CW (1993) British Cretaceous echinoids. Part 3, Stirodonta 2 (Hemicidaroida, Arbacioida and Phymosomatoida, Part 1). *Monogr Palaeontol Soc* 147(593):199 - 267.
135. Smith AB (1994) Triassic echinoids from Peru. *Palaeontogr Abt A* 233(1):177 - 202.

136. Suter SJ (1994) Cladistic analysis of cassiduloid echinoids: trying to see the phylogeny for the trees. *Biol J Linn Soc* 53(1):31 - 72.
137. Saucède T & Neraudeau D (2006) An 'Elvis' echinoid, *Nucleopygus (Jolyclypus) jolyi*, from the Cenomanian of France: phylogenetic analysis, sexual dimorphism and neotype designation. *Cretac Res* 27(4):542-554.
138. Smith AB (2001) Probing the cassiduloid origins of clypeasteroid echinoids using stratigraphically restricted parsimony analysis. *Paleobiology* 27(2):392 - 404.
139. Barras CG (2007) Phylogeny of the Jurassic to Early Cretaceous 'disasteroid' echinoids (Echinoidea; Echinodermata) and the origins of spatangoids and holasteroids. *J Syst Palaeontol* 5(02):133 - 161.
140. Smith AB (2004) Phylogeny and systematics of holasteroid echinoids and their migration into the Deep-sea. *Palaeontology* 47(1):123-150.
141. Saucède T, Mooi R, & David B (2007) Phylogeny and origin of Jurassic irregular echinoids (Echinodermata: Echinoidea). *Geol Mag* 144(2):333 - 359.
142. Kroh A (2007) *Hemipatagus*, a misinterpreted lovenioid (Echinodermata: Echinoidea). *J Syst Palaeontol* 5(2):163 - 192.
143. Smith AB (2007) Intrinsic versus extrinsic biases in the fossil record: contrasting the fossil record of echinoids in the Triassic and early Jurassic using sampling data, phylogenetic analysis, and molecular clocks. *Paleobiology* 33(2):310-323.
144. Smith AB & Savill JJ (2001) *Bromidechinus*, a new Ordovician echinozoan (Echinodermata), and its bearing on the early history of echinoids. *Tran R Soc Edin Earth Sci* 92:137 - 147.
145. Jeffery CH (1999) A reappraisal of the phylogenetic relationships of somaliasterid echinoids. *Palaeontology* 42(6):1027 - 1042.
146. Stockley B, Smith AB, Littlewood T, Lessios HA, & Mackenzie-Dodds JA (2005) Phylogenetic relationships of spatangoid sea urchins (Echinoidea): taxon sampling density and congruence between morphological and molecular estimates. *Zool Scr* 34(5):447-468.
147. Cunningham JA & Jeffery Abt CH (2009) Coordinated shifts to non-planktotrophic development in spatangoid echinoids during the Late Cretaceous. *Biol Lett* 5(5):647-650.
148. Jeffery CH & Emler RB (2003) Macroevolutionary consequences of developmental mode in temnopleurid echinoids from the Tertiary of Southern Australia. *Evolution* 57(5):1031-1048.
149. Villier L, Blake D, Jagt J, & Kutscher M (2004) A preliminary phylogeny of the Pterasteridae (Echinodermata, Asteroidea) and the first fossil record: Late Cretaceous of Germany and Belgium. *Paläontol Zeitschrift* 78(2):281-299.
150. Jiang H, Aldridge RJ, Lai X, Yan C, & Sun Y (2011) Phylogeny of the conodont genera *Hindeodus* and *Isarcicella* across the Permian-Triassic boundary. *Lethaia* 44(4):374 - 382.
151. Wickström LM & Donoghue PCJ (2005) Cladograms, phylogenies and the veracity of the conodont fossil record. *Spec Papers Palaeontol* 73:185 - 218.
152. Donoghue PCJ (2001) Conodonts meet cladistics: recovering relationships and assessing the completeness of the fossil record. *Palaeontology* 44(1):65 - 93.

153. Sansom RS (2008) The origin and early evolution of the Osteostraci (Vertebrata): a phylogeny for the Thyestiida. *J Syst Palaeontol* 6(3):317 - 332.
154. Pernègre VN & Elliott DK (2008) Phylogeny of the Pteraspidoformes (Heterostraci), Silurian–Devonian jawless vertebrates. *Zool Scr* 37(4):391-403.
155. Johnson HG, Elliott DK, & Wittke JH (2000) A new actinolepid arthrodire (Class Placodermi) from the Lower Devonian Sevy Dolomite, east-central Nevada. *Zool J Linn Soc* 129(2):241 – 266.
156. Dupret V (2004) The phylogenetic relationships between actinolepids (Placodermi: Arthrodira) and other arthrodiras (phlyctaeniids and brachythoracids). *Fossils and Strata* 50:44 - 55.
157. Lukševičs E (2001) Bothriolepid antiarchs (Vertebrata, Placodermi) from the Devonian of the north-western part of the East European platform. *Geodiversitas* 23(4):489 - 609.
158. Carr RK & Hlavin WJ (2010) Two new species of *Dunkleosteus* Lehman, 1956, from the Ohio Shale Formation (USA, Famennian) and the Kettle Point Formation (Canada, Upper Devonian), and a cladistic analysis of the Eubrachythoraci (Placodermi, Arthrodira). *Zool J Linn Soc* 159(1):195 - 222.
159. Dupret V & Zhu M (2007) The earliest phyllolepid (Placodermi, Arthrodira) from the Late Lochkovian (Early Devonian) of Yunnan (South China). *Geol Mag* 145:257 - 278.
160. Rücklin M (2011) First selenosteoid placoderms from the eastern Anti-Atlas of Morocco; osteology, phylogeny and palaeogeographical implications. *Palaeontology* 54(1):25-62.
161. Sequeira SEK & Coates MI (2000) Reassessment of '*Cladodus'neilsoni* Traquair: a primitive shark from the Lower Carboniferous of East Kilbride, Scotland. *Palaeontology* 43(1):153-172.
162. Dietze K (2000) A revision of paramblypterid and amblypterid actinopterygians from Upper Carboniferous - Lower Permian lacustrine deposits of Central Europe. *Palaeontology* 43(5):927 - 966.
163. Grande L & Bemis WE (1998) A comprehensive phylogenetic study of Amiid fishes (Amiidae) based on comparative skeletal anatomy. An empirical search for interconnected patterns of natural history. *Mem Soc Vertebrat Paleontol* 4(1):1 - 690.
164. Arratia G (1996) Reassessment of the phylogenetic relationships of certain Jurassic teleosts and their implications on teleostean phylogeny. *Mesozoic Fishes – Systematics and Paleoecology*, eds Arratia G & Viohl G (Verlag, München), pp 219 - 242.
165. Arratia G & Tischlinger H (2010) The first record of Late Jurassic crossognathiform fishes from Europe and their phylogenetic importance for teleostean phylogeny. *Fossil Record* 13(2):317-341.
166. Swartz BA (2009) Devonian actinopterygian phylogeny and evolution based on a redescription of *Stegotrachelus finlayi*. *Zool J Linn Soc* 156(4):750-784.
167. López-Arbarello A & Zavattieri AM (2008) Systematic revision of *Pseudobeaconia* Bordas, 1944, and *Mendocinichthys* Whitley, 1953 (Actinopterygii: 'Perleidiformes') from the Triassic of Argentina. *Palaeontology* 51(5):1025 - 1052.

168. López-Arbarello A (2012) Phylogenetic interrelationships of ginglymodian fishes (Actinopterygii: Neopterygii). *PLoS ONE* 7(7):e39370.
169. Wilson MVH & Murray AM (2008) Osteoglossomorpha: phylogeny, biogeography, and fossil record and the significance of key African and Chinese fossil taxa. *Geol Soc Lond Spec Publ* 295(1):185-219.
170. Xu G-H & Gao K-Q (2011) A new scanilepiform from the Lower Triassic of northern Gansu Province, China, and phylogenetic relationships of non-teleostean Actinopterygii. *Zool J Linn Soc* 161(3):595-612.
171. Santini F & Tyler JC (2003) A phylogeny of the families of fossil and extant tetraodontiform fishes (Acanthomorpha, Tetraodontiformes), Upper Cretaceous to Recent. *Zool J Linn Soc* 139(4):565 - 617.
172. Cloutier R & Ahlberg PE (1995) Morphology, characters, and the interrelationships of basal sarcopterygians. *Interrelationships of fishes, II*, eds Siassny MLJ & Parenti L (Academic Press, London), pp 445 - 479.
173. Zhu M, Yu X, & Ahlberg PE (2001) A primitive sarcopterygian fish with an eyestalk. *Nature* 410(6824):81 - 84.
174. Cloutier R (1991) Patterns, trends and rates of evolution within the Actinistia. *Environmental Biology of Fishes* 32(1):23 - 58.
175. Forey PL (1991) *Latimeria chalumnae* and its pedigree. *Environmental Biology of Fishes* 32(1):75 - 97.
176. Clement G (2005) A new coelacanth (Actinistia, Sarcopterygii) from the Jurassic of France, and the question of the closest fossil relative to *Latimeria*. *J Vertebr Paleontol* 25(3):481 - 491.
177. Friedman M (2007) The interrelationships of Devonian lungfishes (Sarcopterygii: Dipnoi) as inferred from neurocranial evidence and new data from the genus *Soederberghia* Lehman, 1959. *Zool J Linn Soc* 151(1):115-171.
178. Cavin L, Suteethorn V, Buffetaut E, & Tong H (2007) A new Thai Mesozoic lungfish (Sarcopterygii, Dipnoi) with an insight into post-Palaeozoic dipnoan evolution. *Zool J Linn Soc* 149(2):141-177.
179. Johanson Z, Long JA, Talent JA, Janvier P, & Warren JW (2006) Oldest coelacanth, from the Early Devonian of Australia. *Biol Lett* 2(3):443-446.
180. Ahlberg PE, Clack JA, Luksevics E, Blom H, & Zupins I (2008) *Ventastega curonica* and the origin of tetrapod morphology. *Nature* 453(7199):1199-1204.
181. Clack JA (2001) *Eucritta melanolimnetes* from the Early Carboniferous of Scotland, a stem tetrapod showing a mosaic of characteristics. *Tran R Soc Edin Earth Sci* 92(1):75 - 95.
182. Warren A & Marsicano C (2000) A phylogeny of the Brachyopoidea (Temnospondyli, Stereospondyli). *J Vertebr Paleontol* 20(3):462-483.
183. Damiani RJ, Vasconcelos C, Renaut A, Hancox J, & Yates A (2007) *Dolichuranus primaevus* (Therapsida: Anomodontia) from the Middle Triassic of Namibia and its phylogenetic relationships. *Palaeontology* 50(6):1531 - 1546.
184. Schoch RR & Milner AR (2008) The intrarelations and evolutionary history of the temnospondyl family Branchiosauridae. *J Syst Palaeontol* 6(4):409 - 431.
185. Schoch RR (2008) The Capitosauria (Amphibia): characters, phylogeny, and stratigraphy. *Palaeodiversity* 1:189-226.

186. Steyer JS (2003) A revision of the early Triassic “capitosaurs” (Stegocephali, Stereospondyli) from Madagascar, with remarks on their comparative ontogeny. *J Vertebr Paleontol* 23(3):544-555.
187. Englehorn J, Small BJ, & Huttenlocker A (2008) A redescription of *Acroplos vorax* (Temnospondyli: Dvinosauria) based on new specimens from the Early Permian of Nebraska and Kansas, U.S.A. *J Vertebr Paleontol* 28(2):291-305.
188. Sidor CA, *et al.* (2005) Permian tetrapods from the Sahara show climate-controlled endemism in Pangaea. *Nature* 434(7035):886-889.
189. Steyer JS, *et al.* (2006) The vertebrate fauna of the Upper Permian of Niger. IV. *Nigerpeton ricqlesi* (Temnospondyli: Cochleosauridae), and the edopoid colonization of Gondwana. *J Vertebr Paleontol* 26(1):18-28.
190. Damiani RJ (2001) A systematic revision and phylogenetic analysis of Triassic mastodonsauroids (Temnospondyli: Stereospondyli). *Zool J Linn Soc* 133(4):379 – 482.
191. Milner AR (1994) Late Triassic and Jurassic amphibians: fossil record and phylogeny. *In the Shadow of the Dinosaurs*, eds Fraser NC & Sues H-D (Cambridge University Press, New York), pp 5 - 23.
192. Laurin M & Soler-Gijón R (2006) The oldest known stegocephalian (Sarcopterygii: Temnospondyli) from Spain. *J Vertebr Paleontol* 26(2):284 - 299.
193. Schoch RR (2008) A new stereospondyl from the German Middle Triassic, and the origin of the Metoposauridae. *Zool J Linn Soc* 152(1):79-113.
194. Benson RBJ (2012) Interrelationships of basal synapsids: cranial and postcranial morphological partitions suggest different topologies. *J Syst Palaeontol* 10(4):601-624.
195. Maddin HC, Evans DC, & Reisz RR (2006) An Early Permian varanodontine varanopid (Synapsida: Eupelycosauria) from the Richards Spur locality, Oklahoma. *J Vertebr Paleontol* 26(4):957-966.
196. Angielczyk KD (2002) Redescription, phylogenetic position, and stratigraphic significance of the dicynodont genus *Odontocyclops* (Synapsida: Anomodontia). *J Paleontol* 76(6):1047 - 1059.
197. Fröbisch J (2007) The cranial anatomy of *Kombuisia frerensis* Hotton (Synapsida, Dicynodontia) and a new phylogeny of anomodont therapsids. *Zool J Linn Soc* 150(1):117-144.
198. Botha J, Abdala F, & Smith R (2007) The oldest cynodont: new clues on the origin and early diversification of the Cynodontia. *Zool J Linn Soc* 149(3):477-492.
199. Angielczyk KD (2007) New specimens of the Tanzanian dicynodont “*Cryptocynodon parringtoni*” von Huene, 1942 (Therapsida, Anomodontia), with an expanded analysis of Permian dicynodont phylogeny. *J Vertebr Paleontol* 27(1):116 - 131.
200. Abdala F (2007) Redescription of *Platycraniellus elegans* (Therapsida, Cynodontia) from the Lower Triassic of South Africa, and the cladistic relationships of eutheriodonts. *Palaeontology* 50(3):591 - 618.
201. Huttenlocker A (2009) An investigation into the cladistic relationships and monophyly of therocephalian therapsids (Amniota: Synapsida). *Zool J Linn Soc* 157(4):865-891.

202. Huttenlocker AK, Sidor CA, & Smith RMH (2011) A new specimen of *Promoschorhynchus* (Therapsida: Therocephalia: Akidnognathidae) from the Lower Triassic of South Africa and its implications for theriodont survivorship across the Permo-Triassic boundary. *J Vertebr Paleontol* 31(2):405-421.
203. Abdala F & Ribeiro AM (2003) A new traversodontid cynodont from the Santa Maria Formation (Ladinian-Carnian) of southern Brazil, with a phylogenetic analysis of Gondwanan traversodontids. *Zool J Linn Soc* 139(4):529 - 545.
204. Kammerer CF, Flynn JJ, Ranivoharimanana L, & Wyss RR (2008) New material of *Menadon besairiei* (Cynodontia: Traversodontidae) from the Triassic of Madagascar. *J Vertebr Paleontol* 28(2):445-462.
205. Rougier GW, Isaji S, & Manabe M (2007) An Early Cretaceous mammal from the Kuwajima Formation (Tetori Group), Japan, and a reassessment of triconodont phylogeny. *Annals Carnegie Mus* 76(2):73-115.
206. Marivaux L, *et al.* (2011) Zegdomyidae (Rodentia, Mammalia), stem anomaluroid rodents from the Early to Middle Eocene of Algeria (Gour Lazib, Western Sahara): new dental evidence. *J Syst Palaeontol* 9(4):563-588.
207. Lihoreau F, Blondel C, Barry J, & Brunet M (2004) A new species of the genus *Microbunodon* (Anthracotheriidae, Artiodactyla) from the Miocene of Pakistan: genus revision, phylogenetic relationships and palaeobiogeography. *Zool Scr* 33(1):97 - 115.
208. Wang X, McKenna MC, & Dashzeveg D (2005) *Amphicticeps* and *Amphicynodon* (Arctoidea, Carnivora) from Hsanda Gol Formation, Central Mongolia and phylogeny of basal arctoids with comments on zoogeography. *Am Mus Novit* 3483:1 - 57.
209. Hopkins SSB (2008) Phylogeny and evolutionary history of the Aplodontoidea (Mammalia: Rodentia). *Zool J Linn Soc* 153(4):769-838.
210. Uhen MD & Gingerich PD (2001) New genus of dorudontine archaeocete (Cetacea) from the middle-to-late Eocene of South Carolina. *Mar Mam Sci* 17(1):1-34.
211. Dashzeveg D & Meng J (1998) New Eocene ctenodactyloid rodents from the Eastern Gobi Desert of Mongolia and a phylogenetic analysis of ctenodactyloids based on dental features. *Am Mus Novit* 3246:1 - 20.
212. Guo J, Dawson MR, & Beard KC (2000) *Zhailimeryx*, a new lophiomerycid artiodactyl (Mammalia) from the Late Middle Eocene of Central China and the early evolution of ruminants. *Journal of Mammalian Evolution* 7(4):239-258.
213. Muizon Cd (1999) Marsupial skulls from the Deseadan (late Oligocene) of Bolivia and phylogenetic analysis of the Borhyaenoidea (Marsupialia, Mammalia). *Geobios* 32(3):483 - 509.
214. Wang X, Tedford RH, & Taylor BE (1999) Phylogenetic systematics of the Borophaginae (Carnivora: Canidae). *Bull Am Mus Nat Hist* 243:1-392.
215. Mhlbachler MC (2008) Species taxonomy, phylogeny, and biogeography of the Brontotheriidae (Mammalia: Perissodactyla). *Bull Am Mus Nat Hist* 311(1):1 - 475.
216. Wesley-Hunt GD & Flynn JJ (2005) Phylogeny of the Carnivora: basal relationships among the carnivoramorphan, and assessment of the position of "Miacoidea" relative to crown-clade Carnivora. *J Syst Palaeontol* 3(1):1 - 28.
217. Bloch JI, Fisher DC, Rose KD, & Gingerich PD (2001) Stratocladistic analysis of Paleocene Carpolestidae (Mammalia, Plesiadapiformes) with description of a new late Tiffanian genus. *J Vertebr Paleontol* 21(1):119-131.



218. Holbrook LT (2001) Comparative osteology of early Tertiary tapiromorphs (Mammalia, Perissodactyla). *Zool J Linn Soc* 132(1):1 - 54.
219. Hooker JJ & Dashzeveg D (2004) The origin of chalicotheres (Perissodactyla, Mammalia). *Palaeontology* 47(6):1363 - 1386.
220. Woodburne MO (2007) Phyletic diversification of the *Cormohipparion occidentale* complex (Mammalia; Perissodactyla, Equidae), Late Miocene, North America, and the origin of the Old World *Hippotherium* datum. *Bull Am Mus Nat Hist* 306(1):1-138.
221. Archibald JD, Averianov AO, & Ekdale EG (2001) Late Cretaceous relatives of rabbits, rodents, and other extant eutherian mammals. *Nature* 414(6859):62-65.
222. Métais G, Guo J, & Beard KC (2004) A new small dichobunid artiodactyl from Shanghuang (Middle Eocene, Eastern China): Implications for the early evolution of proto-selenodonts in Asia. *Bulletin of Carnegie Museum of Natural History* 36(1):177-197.
223. Gelfo JN (2004) A new South American mioclaenid (Mammalia: Ungulatomorpha) from the Tertiary of Patagonia, Argentina. *Ameghiniana* 41:475 - 484.
224. Shoshani J, *et al.* (2006) A proboscidean from the Late Oligocene of Eritrea, a "missing link" between early Elephantiformes and Elephantimorpha, and biogeographic implications. *Proc Natl Acad Sci USA* 103(46):17296 - 17301.
225. Froehlich DJ (2002) Quo vadis *Eohippus*? The systematics and taxonomy of the early Eocene equids (Perissodactyla). *Zool J Linn Soc* 134(2):141 - 256.
226. Rougier GW, Novacek MJ, McKenna MC, & Wible JR (2001) Gobiconodonts from the Early Cretaceous of Oshih (Ashile), Mongolia. *Am Mus Novit* 3348:1-30.
227. Alroy J (1995) Continuous track analysis: a new phylogenetic and biogeographic method. *Syst Bio* 44(2):152 - 178.
228. Prado JL & Alberdi MT (1996) A cladistic analysis of the horses of the tribe Equini. *Palaeontology* 39(3):663 - 680.
229. Forasiepi AM, *et al.* (2006) A new species of Hathliacynidae (Metatheria, Sparassodonta) from the Middle Miocene of Quebrada Honda, Bolivia. *J Vertebr Paleontol* 26(3):670 - 684.
230. Boisserie J-R (2005) The phylogeny and taxonomy of Hippopotamidae (Mammalia: Artiodactyla): a review based on morphology and cladistic analysis. *Zool J Linn Soc* 143(1):1 - 26.
231. Geraads D, *et al.* (2008) New Hippotragini (Bovidae, Mammalia) from the Late Miocene of Toros-Menalla (Chad). *J Vertebr Paleontol* 28(1):231-242.
232. Strait DS & Grine FE (2004) Inferring hominoid and early hominid phylogeny using craniodental characters: the role of fossil taxa. *J Human Evol* 47(6):399-452.
233. Finarelli JA & Clyde WC (2004) Reassessing hominoid phylogeny: evaluating congruence in the morphological and temporal data. *Paleobiology* 30(4):614 - 651.
234. Werdelin L & Solounias N (1991) The Hyaenidae: taxonomic systematics and evolution. *Fossils and Strata* 30:1 - 104.

235. Polly PD (1996) The skeleton of *Gazinocyon vulpeculus* gen. et. comb nov. and the cladistic relationships of Hyaenodontidae (Eutheria, Mammalia). *J Vertebr Paleontol* 16(2):303 - 319.
236. Solé F (2013) New proviverrine genus from the Early Eocene of Europe and the first phylogeny of Late Palaeocene–Middle Eocene hyaenodontidans (Mammalia). *J Syst Palaeontol* 11(4):375 - 398.
237. Hooker JJ & Dashzeveg D (2003) Evidence for direct mammalian faunal interchange between Europe and Asia near the Paleocene-Eocene boundary. *Geol Soc America Spec Papers* 369:479 – 500.
238. Hooker JJ & Russell DE (2012) Early Palaeogene Louisinidae (Macroscelidea, Mammalia), their relationships and north European diversity. *Zool J Linn Soc* 164(4):856-936.
239. Wallace SC & Hulbert RC, Jr. (2013) A New Machairodont from the Palmetto Fauna (Early Pliocene) of Florida, with Comments on the Origin of the Smilodontini (Mammalia, Carnivora, Felidae). *PLoS ONE* 8(3):e56173.
240. Pujos F, De Iuliis G, Argot C, & Werdelin L (2007) A peculiar climbing Megalonychidae from the Pleistocene of Peru and its implication for sloth history. *Zool J Linn Soc* 149(2):179-235.
241. Carlini AA, Ciancio MR, Flynn JJ, Scillato-Yané GJ, & Wyss AR (2009) The phylogenetic and biostratigraphic significance of new armadillos (Mammalia, Xenarthra, Dasypodidae, Euphractinae) from the Tinguirirican (Early Oligocene) of Chile. *J Syst Palaeontol* 7(4):489-503.
242. Williamson TE & Carr TD (2007) *Bomburia* and *Ellipsodon* (Mammalia: Mioclaenidae) from the Early Paleocene of New Mexico. *J Paleontol* 81(5):966-985.
243. Kielan-Jaworowska Z & Hurum JH (2001) Phylogeny and systematics of multituberculate mammals. *Palaeontology* 44(3):389-429.
244. Finarelli JA (2008) A total evidence phylogeny of the Arctoidea (Carnivora: Mammalia): relationships among basal taxa. *Journal of Mammalian Evolution* 15(4):231 - 259.
245. Bisconti M (2007) A new basal balaenopterid whale from the Pliocene of northern Italy. *Palaeontology* 50(5):1103 - 1122.
246. Peigne S (2003) Systematic review of European Nimravinae (Mammalia, Carnivora, Nimravidae) and the phylogenetic relationships of Palaeogene Nimravidae. *Zool Scr* 32(3):199-229.
247. Shockey BJ (1997) Two new notoungulates (Family Notohippidae) from the Salla Beds of Bolivia (Deseadan: late Oligocene): systematics and functional morphology. *J Vertebr Paleontol* 17(3):584-599.
248. Kohno N (2006) A new Miocene odobenid (Mammalia: Carnivora) from Hokkaido, Japan, and its implications for odobenid phylogeny. *J Vertebr Paleontol* 26(2):411-421.
249. Ni X, et al. (2010) A new tarkadectine primate from the Eocene of Inner Mongolia, China: phylogenetic and biogeographic implications. *Proc Biol Sci* 277(1679):247-256.
250. Goin FJ, Candela AM, Abello MA, & Oliveira EV (2009) Earliest South American paucituberculatans and their significance in the understanding of 'pseudodiprotodont' marsupial radiations. *Zool J Linn Soc* 155(4):867-884.

251. Grégoire M, Guo J, & Beard KC (2004) A new small dichobunid artiodactyl from Shanghuang (Middle Eocene, eastern China): implications for the early evolution of proto-selenodonts in Asia. *Bulletin of Carnegie Museum of Natural History*:177-197.
252. Métais G (2006) New basal selenodont artiodactyls from the Pondaung Formation (Late Middle Eocene, Myanmar and the phylogenetic relationships of early ruminants. *Annals Carnegie Mus* 75(1):51 - 67.
253. Sweetman SC (2008) A spalacolestine spalacotheriid (Mammalia, Trechnotheria) from the Early Cretaceous (Barremian) of southern England and its bearing on spalacotheriid evolution. *Palaeontology* 51(6):1367 – 1385.
254. Rook DL & Hunter JP (2011) Phylogeny of the Taeniodonta: evidence from dental characters and stratigraphy. *J Vertebr Paleontol* 31(2):422 - 427.
255. Nasif NL, Musalem S, & Cerdeño E (2000) A new toxodont from the Late Miocene of Catamarca, Argentina, and a phylogenetic analysis of the Toxodontidae. *J Vertebr Paleontol* 20(3):591-600.
256. Gelfo JN, Lopez GM, & Bond M (2008) A new Xenungulata (Mammalia) from the Paleocene of Patagonia, Argentina. *J Paleontol* 82(2):329 – 335.
257. López-Antoñanzas R & Sen S (2006) New Saudi Arabian Miocene jumping mouse (Zapodidae): systematics and phylogeny. *J Vertebr Paleontol* 26(1):170-181.
258. Tsuji LA, Müller J, & Reisz RR (2010) *Microleter mckinzieorum* gen. et sp. nov. from the Lower Permian of Oklahoma: the basalmost parareptile from Laurasia. *J Syst Palaeontol* 8(2):245-255.
259. Lyson TR & Joyce WG (2009) A new species of *Palatobaena* (Testudines: Baenidae) and a Maximum Parsimony and Bayesian phylogenetic analysis of Baenidae. *J Paleontol* 83(3):457 - 470.
260. Joyce WG (2007) Phylogenetic relationships of Mesozoic turtles. *Bull Peabody Mus Nat Hist* 48(1):3-102.
261. Sues H-D & Reisz RR (2008) Anatomy and phylogenetic relationships of *Sclerosaurus armatus* (Amniota: Parareptilia) from the Buntsandstein (Triassic) of Europe. *J Vertebr Paleontol* 28(4):1031-1042.
262. Cisneros JC, Rubidge BS, Mason RD, & Dube C (2008) Analysis of millerettid parareptile relationships in the light of new material of *Broomia perplexa* Watson, 1914, from the Permian of South Africa. *J Syst Palaeontol* 6(4):453 - 462.
263. Joyce WG & Norell MA (2005) *Zangerlia ukhaachelys*, new species, a nanhsiungchelyid turtle from the Late Cretaceous of Ukhaa Tolgod, Mongolia. *Am Mus Novit* 3481:1 - 20.
264. Cisneros JC (2008) Phylogenetic relationships of procolophonid parareptiles with remarks on their geological record. *J Syst Palaeontol* 6(3):345-366
265. Motani R (1999) Phylogeny of the Ichthyopterygia. *J Vertebr Paleontol* 19(3):473 - 496.
266. Thorne PM, Ruta M, & Benton MJ (2011) Resetting the evolution of marine reptiles at the Triassic-Jurassic boundary. *Proc Natl Acad Sci USA* 108(20):8339-8344.
267. Bell GL, Jr. (1997) A phylogenetic revision of North American and Adriatic Mosasauroida. *Ancient marine reptiles*, eds Callaway JM & Nicholls EL (Academic Press, San Diego), pp 293 - 332.

268. Christiansen P & Bonde N (2002) A new species of gigantic mosasaur from the Late Cretaceous of Israel. *J Vertebr Paleontol* 22(3):629 - 644.
269. Dortangs RW, *et al.* (2002) A large new mosasaur from the Upper Cretaceous of the Netherlands. *Netherlands Journal of Geosciences* 81:1 - 8.
270. O'Keefe FR & Street HP (2009) Osteology of the cryptocleidoid plesiosaur *Tatenectes laramiensis*, with comments on the taxonomic status of the Cimoliasauridae. *J Vertebr Paleontol* 29(1):48-57.
271. Jiang D-Y, Maisch MW, Hao W-C, Sun YO, & Sun Z-Y (2006) *Nothosaurus yangyuanensis* n. sp (Reptilia, Sauropterygia, Nothosauridae) from the middle Anisian (Middle Triassic) of Guizhou, southwestern China. *Neues Jahrb Geol Paläontol Monat* 2006(5):257 - 276.
272. Rieppel O (2000) *Paraplocodus* and the phylogeny of the Placodontia (Reptilia: Sauropterygia). *Zool J Linn Soc* 130(6):635 - 659.
273. Großmann F (2007) The taxonomic and phylogenetic position of the Plesiosauroidea from the Lower Jurassic Posidonia Shale of south-west Germany. *Palaeontology* 50(3):545 - 564.
274. O'Keefe FR (2001) A cladistic analysis and taxonomic revision of the Plesiosauria (Reptilia: Sauropterygia). *Acta Zool Fennica* 213:1 - 63.
275. O'Keefe FR (2008) Cranial anatomy and taxonomy of *Dolichorhynchops bonneri* new combination, a polycotyloid (Sauropterygia: Plesiosauria) from the Pierre Shale of Wyoming and South Dakota. *J Vertebr Paleontol* 28(3):664 - 676.
276. Reynoso V-H (1996) A Middle Jurassic *Sphenodon*-like sphenodontian (Diapsida: Lepidosauria) from Huizachal Canyon, Tamaulipas, Mexico. *J Vertebr Paleontol* 16(2):210-221.
277. Dilkes DW (1998) The early Triassic rhynchosaur *Mesosuchus browni* and the interrelationships of basal archosauromorph reptiles. *Phil Trans Royal Soc London Ser B* 353(1368):501 - 541.
278. Clark JM & Sues H-D (2002) Two new basal crocodylomorph archosaurs from the Lower Jurassic and the monophyly of the Sphenosuchia. *Zool J Linn Soc* 136(1):77 - 95.
279. Salisbury SW, Molnar RE, Frey E, & Willis PM (2006) The origin of modern crocodyliforms: new evidence from the Cretaceous of Australia. *Proc Biol Sci* 273(1600):2439 - 2448.
280. Brusatte SL, Benton MJ, Desojo JB, & Langer MC (2010) The higher-level phylogeny of Archosauria (Tetrapoda: Diapsida). *J Syst Palaeontol* 8(1):3 - 47.
281. Buchwitz M, Foth C, Kogan I, & Voigt S (2012) On the use of osteoderm features in a phylogenetic approach on the internal relationships of the Chroniosuchia (Tetrapoda: Reptiliomorpha). *Palaeontology* 55(3):623 - 640.
282. Brochu CA (1997) Morphology, fossils, divergence timing, and the phylogenetic relationships of *Gavialis*. *Syst Bio* 46(3):479 - 522.
283. Zaher H, *et al.* (2006) Redescription of the cranial morphology of *Mariliasuchus amarali*, and its phylogenetic affinities (Crocodyliformes, Notosuchia). *Am Mus Novit* 3512(1):1 - 40.

284. Piras P & Buscalioni AD (2006) *Diplocynodon muelleri* comb. nov., an Oligocene diplocynodontine alligatoroid from Catalonia (Ebro Basin, Lleida Province, Spain). *J Vertebr Paleontol* 26(3):608-620.
285. Hill RV, *et al.* (2008) Dyrosaurid (Crocodyliformes: Mesoeucrocodylia) fossils from the Upper Cretaceous and Paleogene of Mali: implications for phylogeny and survivorship across the K/T Boundary. *Am Mus Novit* 3631:1-19.
286. Young MT & De Andrade MB (2009) What is *Geosaurus*? Redescription of *Geosaurus giganteus* (Thalattosuchia: Metriorhynchidae) from the Upper Jurassic of Bayern, Germany. *Zool J Linn Soc* 157(3):551-585.
287. Wilkinson LE, Young MT, & Benton MJ (2008) A new metriorhynchid crocodile (Mesoeucrocodylia: Thalattosuchia) from the Kimmeridgian (Upper Jurassic) of Wiltshire, UK. *Palaeontology* 51(6):1307-1333.
288. Hungerbühler A (2002) The Late Triassic phytosaur *Mystriosuchus westphali*, with a revision of the genus. *Palaeontology* 45:377 - 418.
289. Stocker MR (2010) A new taxon of phytosaur (Archosauria: Pseudosuchia) from the Late Triassic (Norian) Sonsela Member (Chinle Formation) in Arizona, and a critical reevaluation of *Leptosuchus* Case, 1922. *Palaeontology* 53(5):997-1022.
290. Stocker MR (2012) A new phytosaur (Archosauriformes, Phytosauria) from the Lot's Wife beds (Sonsela Member) within the Chinle Formation (Upper Triassic) of Petrified Forest National Park, Arizona. *J Vertebr Paleontol* 32(3):573-586.
291. Gasparini Z, Pol D, & Spalletti LA (2006) An unusual marine crocodyliform from the Jurassic-Cretaceous boundary of Patagonia. *Science* 311(5757):70-73.
292. Pol D, Leardi JM, Lecuona A, & Krause M (2012) Postcranial anatomy of *Sebecus icaeorhinus* (Crocodyliformes, Sebecidae) from the Eocene of Patagonia. *J Vertebr Paleontol* 32(2):328-354.
293. Kellner AWA, Pinheiro AEP, & Campos DA (2014) A new sebecid from the Paleogene of Brazil and the crocodyliform radiation after the K-Pg Boundary. *PLoS ONE* 9(1):e81386.
294. Liu J & Rieppel O (2005) Restudy of *Anshunsaurus huangguoshuensis* (Reptilia: Thalattosauria) from the Middle Triassic of Guizhou, China. *Am Mus Novit* 3488:1 - 34.
295. Andres B, Clark JM, & Xing X (2010) A new rhamphorhynchid pterosaur from the Upper Jurassic of Xinjiang, China, and the phylogenetic relationships of basal pterosaurs. *J Vertebr Paleontol* 30(1):163 - 187.
296. Lü J, Unwin DM, Jin X, Liu Y, & Ji Q (2010) Evidence for modular evolution in a long-tailed pterosaur with a pterodactyloid skull. *Proc Biol Sci* 277(1680):383 - 389.
297. Brusatte SL & Sereno PC (2008) Phylogeny of Allosauroida (Dinosauria: Theropoda): comparative analysis and resolution. *J Syst Palaeontol* 6(2):155-182.
298. Thompson RS, Parish JC, Maidment SCR, & Barrett PM (2012) Phylogeny of the ankylosaurian dinosaurs (Ornithischia: Thyreophora). *J Syst Palaeontol* 10(2):301-312.
299. Ösi A (2005) *Hungarosaurus tormai*, a new ankylosaur (Dinosauria) from the Upper Cretaceous of Hungary. *J Vertebr Paleontol* 25(2):370-383.
300. McDonald AT (2012) Phylogeny of basal iguanodonts (Dinosauria: Ornithischia): an update. *PLoS ONE* 7(5):e36745.

301. Benson R, Carrano M, & Brusatte S (2010) A new clade of archaic large-bodied predatory dinosaurs (Theropoda: Allosauroidae) that survived to the latest Mesozoic. *Naturwissenschaften* 97(1):71-78.
302. Wu X-c, Brinkman DB, Eberth DA, & Braman DR (2007) A new ceratopsid dinosaur (Ornithischia) from the Upper most Horseshoe Canyon Formation (Upper Maastrichtian), Alberta, Canada. *Can J Earth Sciences* 44(9):1243-1265.
303. Carrano MT & Sampson SD (2008) The phylogeny of Ceratosauria (Dinosauria). *J Syst Palaeontol* 6(2):183-236.
304. Sampson SD, *et al.* (2010) New horned dinosaurs from Utah provide evidence for intracontinental dinosaur endemism. *PLoS Biol* 5(9):1 - 12.
305. Makovicky PJ & Sues H-D (1998) Anatomy and phylogenetic relationships of the theropod dinosaur *Microvenator celer* from the Lower Cretaceous of Montana. *Am Mus Novit* 3240:1 - 27.
306. Xu X, Cheng Y-N, Wang X-L, & Chang C-H (2002) An unusual oviraptorosaurian dinosaur from China. *Nature* 419:291 - 293.
307. Hwang SH, Norell MA, Qiang JI, & Keqin GAO (2002) New specimens of *Microraptor zhaoianus* (Theropoda: Dromaeosauridae) from northeastern China. *Am Mus Novit* 381:1 - 44.
308. Whitlock JA (2011) A phylogenetic analysis of Diplodocoidea (Saurischia: Sauropoda). *Zool J Linn Soc* 161(4):872-915.
309. Zheng X, Xu X, You H, Zhao Q, & Dong Z (2010) A short-armed dromaeosaurid from the Jehol Group of China with implications for early dromaeosaurid evolution. *Proc Biol Sci* 277(1679):211-217.
310. Weishampel DB & Heinrich RE (1992) Systematics of Hypsilophodontidae and basal Iguanodontia (Dinosauria: Ornithopoda). *Hist Biol* 6(3):159 - 184.
311. Gates TA & Sampson SD (2007) A new species of *Gryposaurus* (Dinosauria: Hadrosauridae) from the late Campanian Kaiparowits Formation, southern Utah, USA. *Zool J Linn Soc* 151(2):351 - 376.
312. Sues H-D & Averianov A (2009) A new basal hadrosauroid dinosaur from the Late Cretaceous of Uzbekistan and the early radiation of duck-billed dinosaurs. *Proc Biol Sci* 276(1667):2549-2555.
313. Makovicky PJ & Norell MA (2006) *Yamaceratops dorn gobiensis*, a new primitive ceratopsian (Dinosauria: Ornithischia) from the Cretaceous of Mongolia. *Am Mus Novit* 3530(1):1 - 42.
314. Zhao X, Cheng Z, Xu X, & Makovicky PJ (2006) A new ceratopsian from the Upper Jurassic Houcheng Formation of Hebei, China. *Acta Geol Sinica* 80(4):467 - 473.
315. Weishampel DB, Jianu C-M, Csiki Z, & Norman DB (2003) Osteology and phylogeny of *Zalmoxes* (n.g), an unusual euornithopod dinosaur from the latest Cretaceous of Romania. *J Syst Palaeontol* 1(2):65 - 123.
316. Xu X, Norell MA, Wang X-l, Makovicky PJ, & Wu X-c (2002) A basal troodontid from the Early Cretaceous of China. *Nature* 415(6873):780-784.
317. Yates AM (2003) A new species of the primitive dinosaur *Thecodontosaurus* (Saurischia: Sauropodomorpha) and its implications for the systematics of early dinosaurs. *J Syst Palaeontol* 1(1):1-42.
318. Prieto-Márquez A (2010) Global phylogeny of Hadrosauridae (Dinosauria: Ornithopoda) using parsimony and Bayesian methods. *Zool J Linn Soc* 159(2):435-502.

319. Harris JD (2006) The significance of *Suuwassea emilieae* (Dinosauria: Sauropoda) for flagellicaudatan intrarelationships and evolution. *J Syst Palaeontol* 4(2):185 - 198.
320. D'Emic MD (2012) The early evolution of titanosauriform sauropod dinosaurs. *Zool J Linn Soc* 166(3):624-671.
321. Brusatte SL, *et al.* (2010) Tyrannosaur paleobiology: new research on ancient exemplar organisms. *Science* 329(5998):1481-1485.
